# Supplementary material for: Divergent reactivity of divinylsilanes toward sulfonamides in different oxidative systems
Source: Royal Society of Chemistry journal article supplement (doi:10.1039/d0ra07469a), 2020-01-01

**Divergent reactivity of divinylsilanes toward sulfonamides in different oxidative systems**

**Vera V. Astakhova, Mikhail Yu. Moskalik, Bagrat A. Shainyan**

A.E. Favorsky Irkutsk Institute of Chemistry, Siberian Division of the Russian Academy of Sciences, 1  
Favorsky Street, 664033 Irkutsk, Russian Federation

\*Corresponding Author: Prof. Dr. Bagrat A. Shainyan,

A.E. Favorsky Irkutsk Institute of Chemistry,  
Siberian Division of the Russian Academy of Sciences, 1 Favorsky Street, 664033 Irkutsk, Russian  
Federation, [bagrat@irioch.irk.ru](mailto:bagrat@irioch.irk.ru).

**Electronic supplementary information**

Copies of  $^1\text{H}$  and  $^{13}\text{C}$  NMR spectra of all compounds

S1-S73

# Copies of <sup>1</sup>H and <sup>13</sup>C NMR spectra of all compounds

Figure S1. <sup>1</sup>H NMR spectrum of compound **4**

*(2-chloro-1-iodoethyl)diphenyl(vinyl)silane, 4*

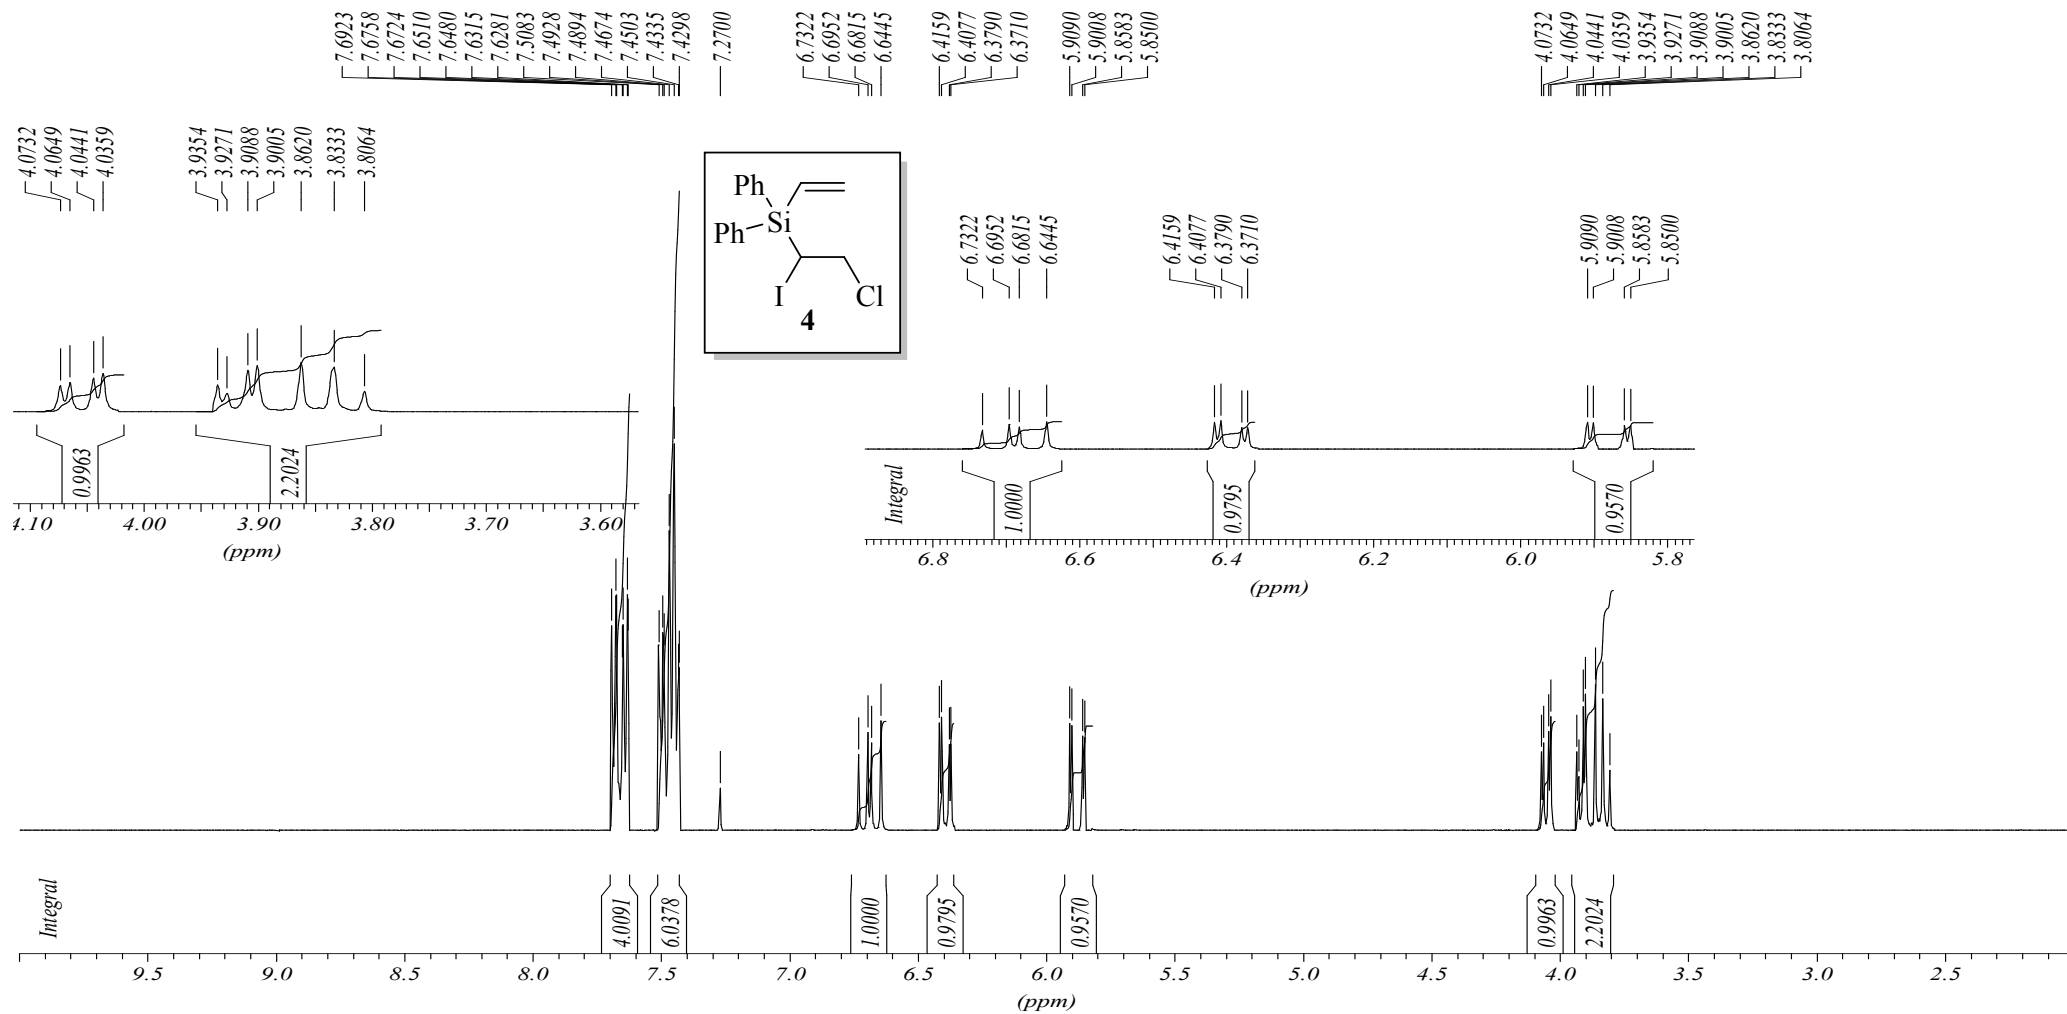

Figure S2.  $^{13}\text{C}$  NMR spectrum of compound **4**

*(2-Chloro-1-iodoethyl)diphenyl(vinyl)silane, 4*

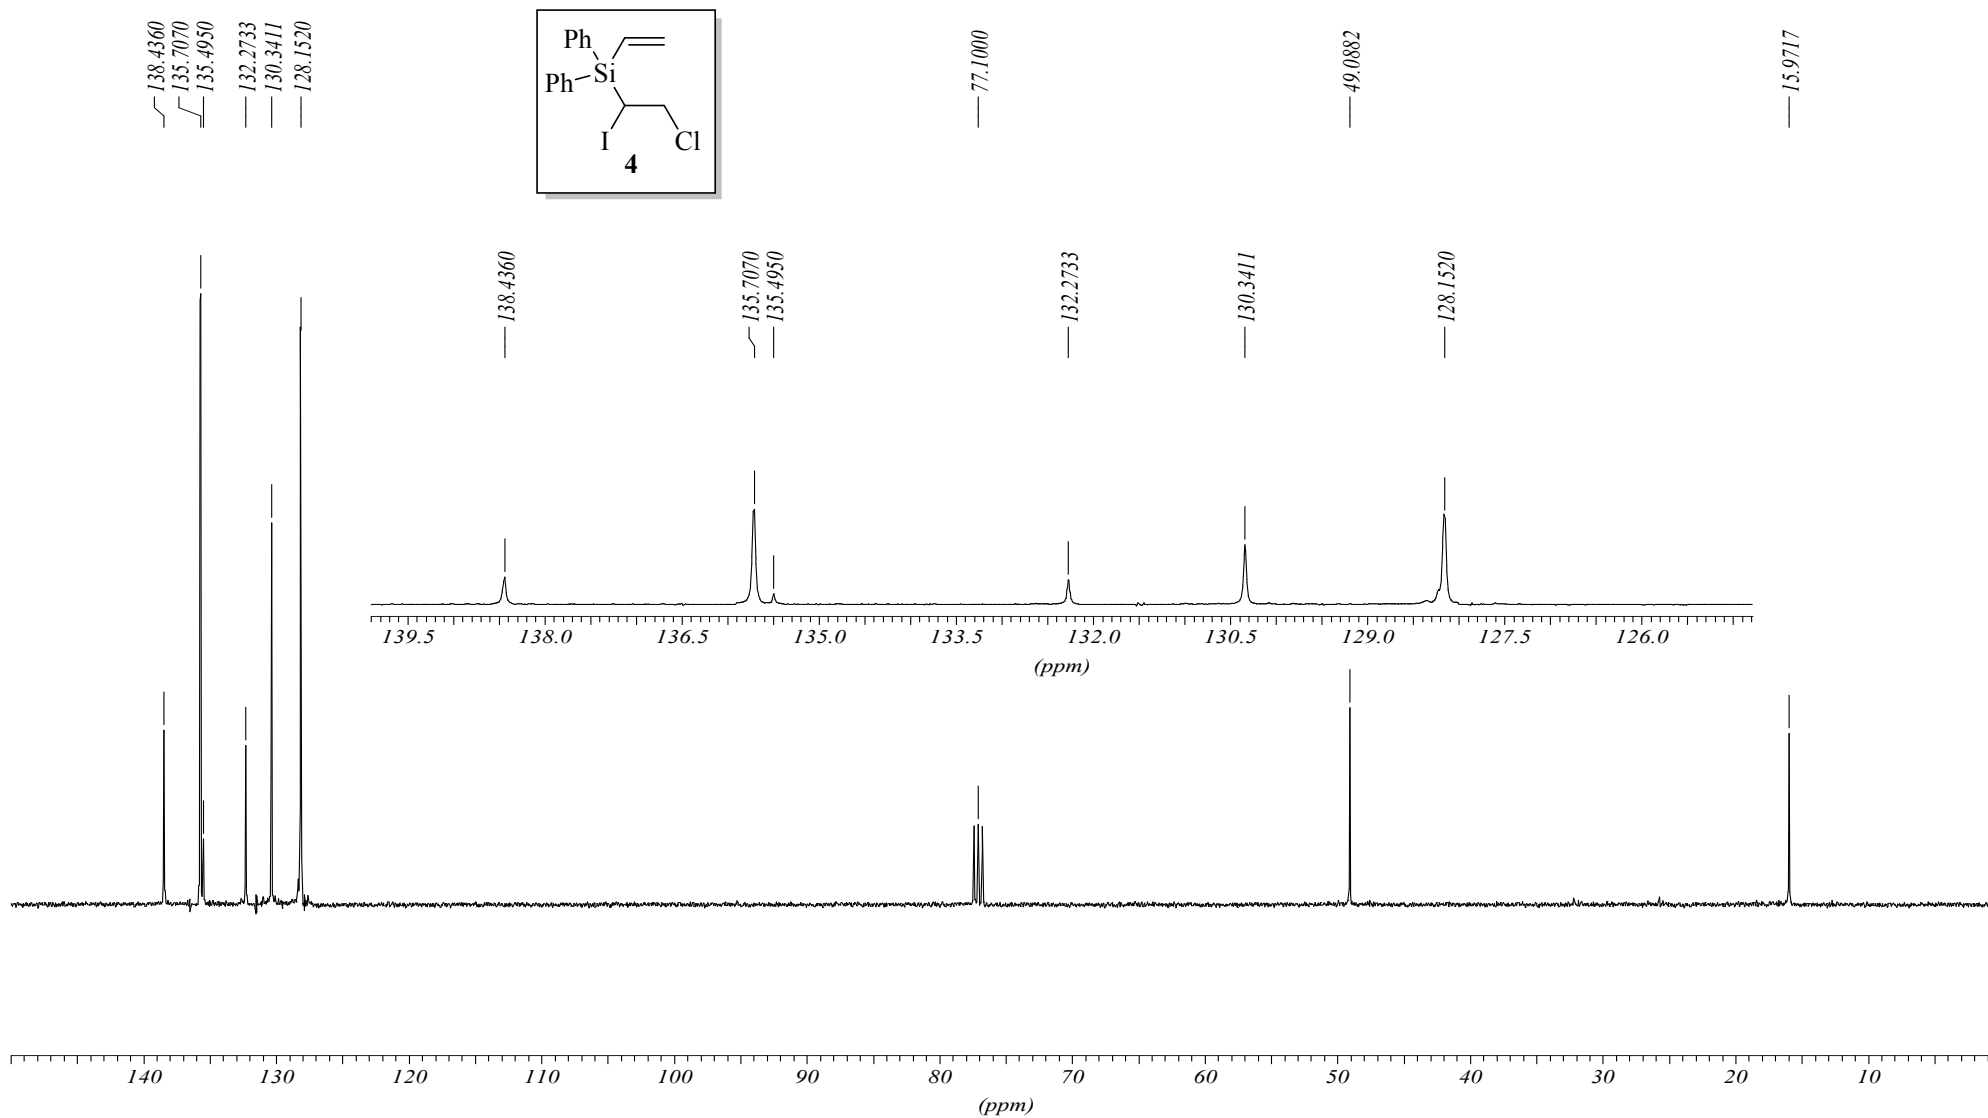

Figure S3. <sup>1</sup>H NMR spectrum of compound **5**

*Bis(1-chloro-2-iodoethyl)diphenylsilane, 5* (R = Ph).

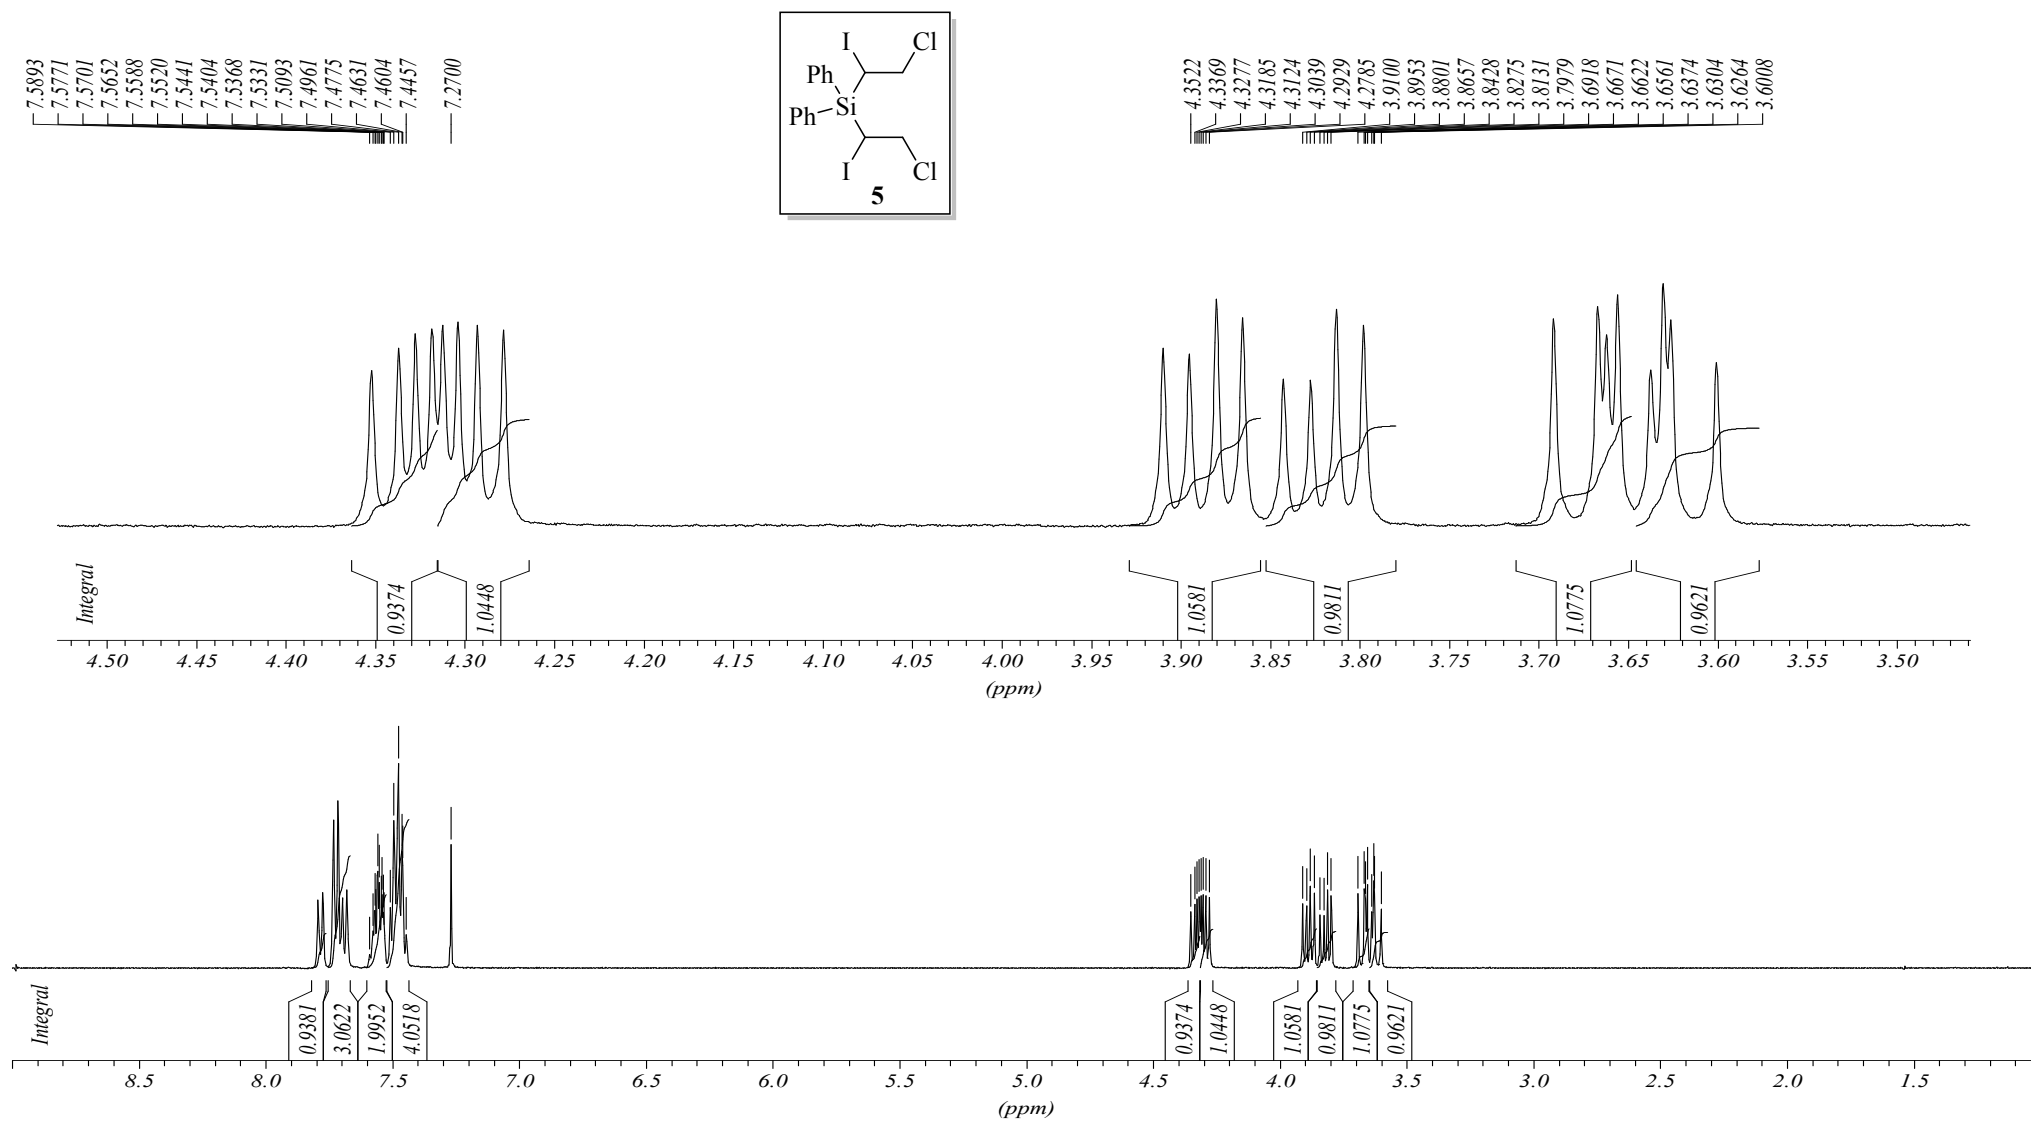

Figure S4.  $^{13}\text{C}$  NMR spectrum of compound **5**

*Bis(1-chloro-2-iodoethyl)diphenylsilane, 5* (R = Ph).

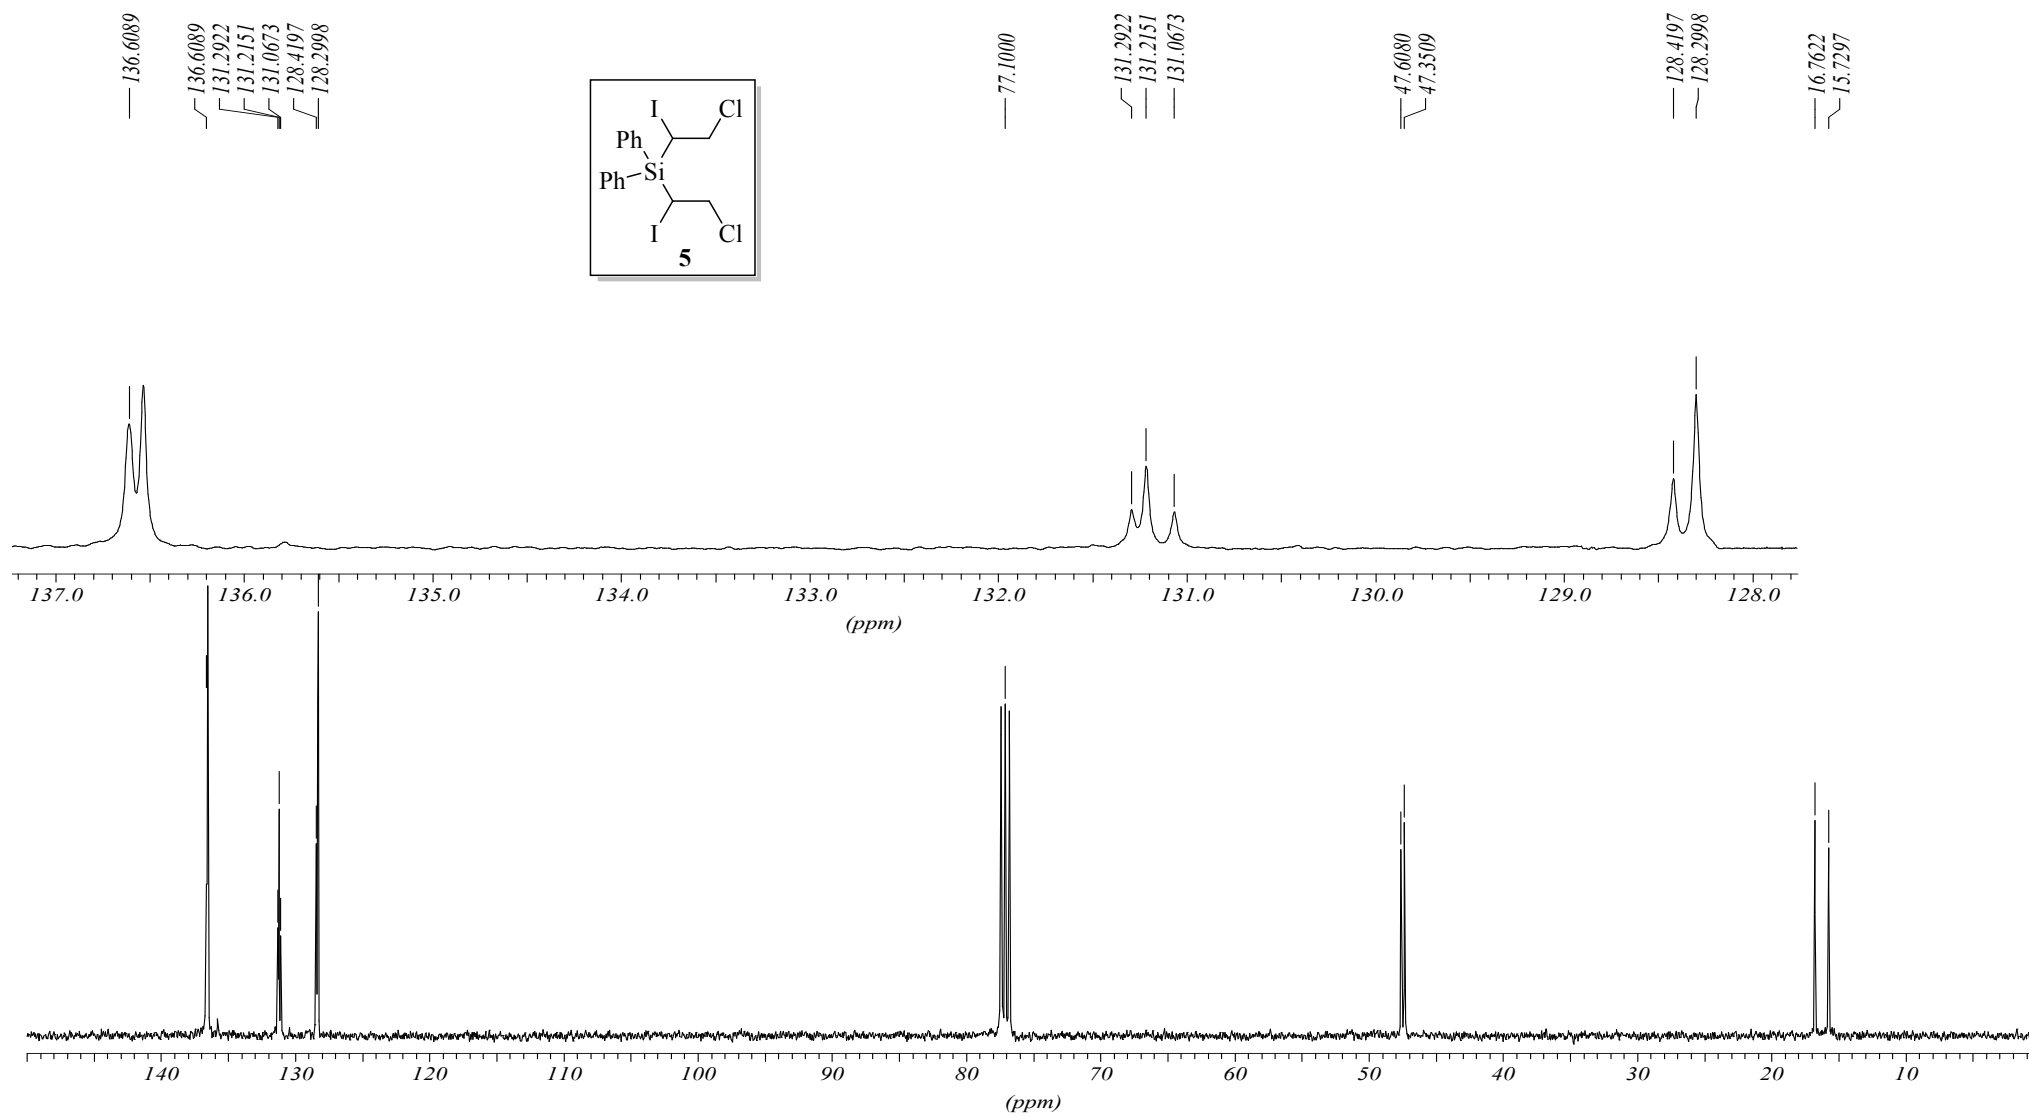

Figure S5. <sup>1</sup>H NMR spectrum of compound **6**

2-(Diphenyl(vinyl)silyl)-1-((4-nitrophenyl)sulfonyl)aziridine, **6**

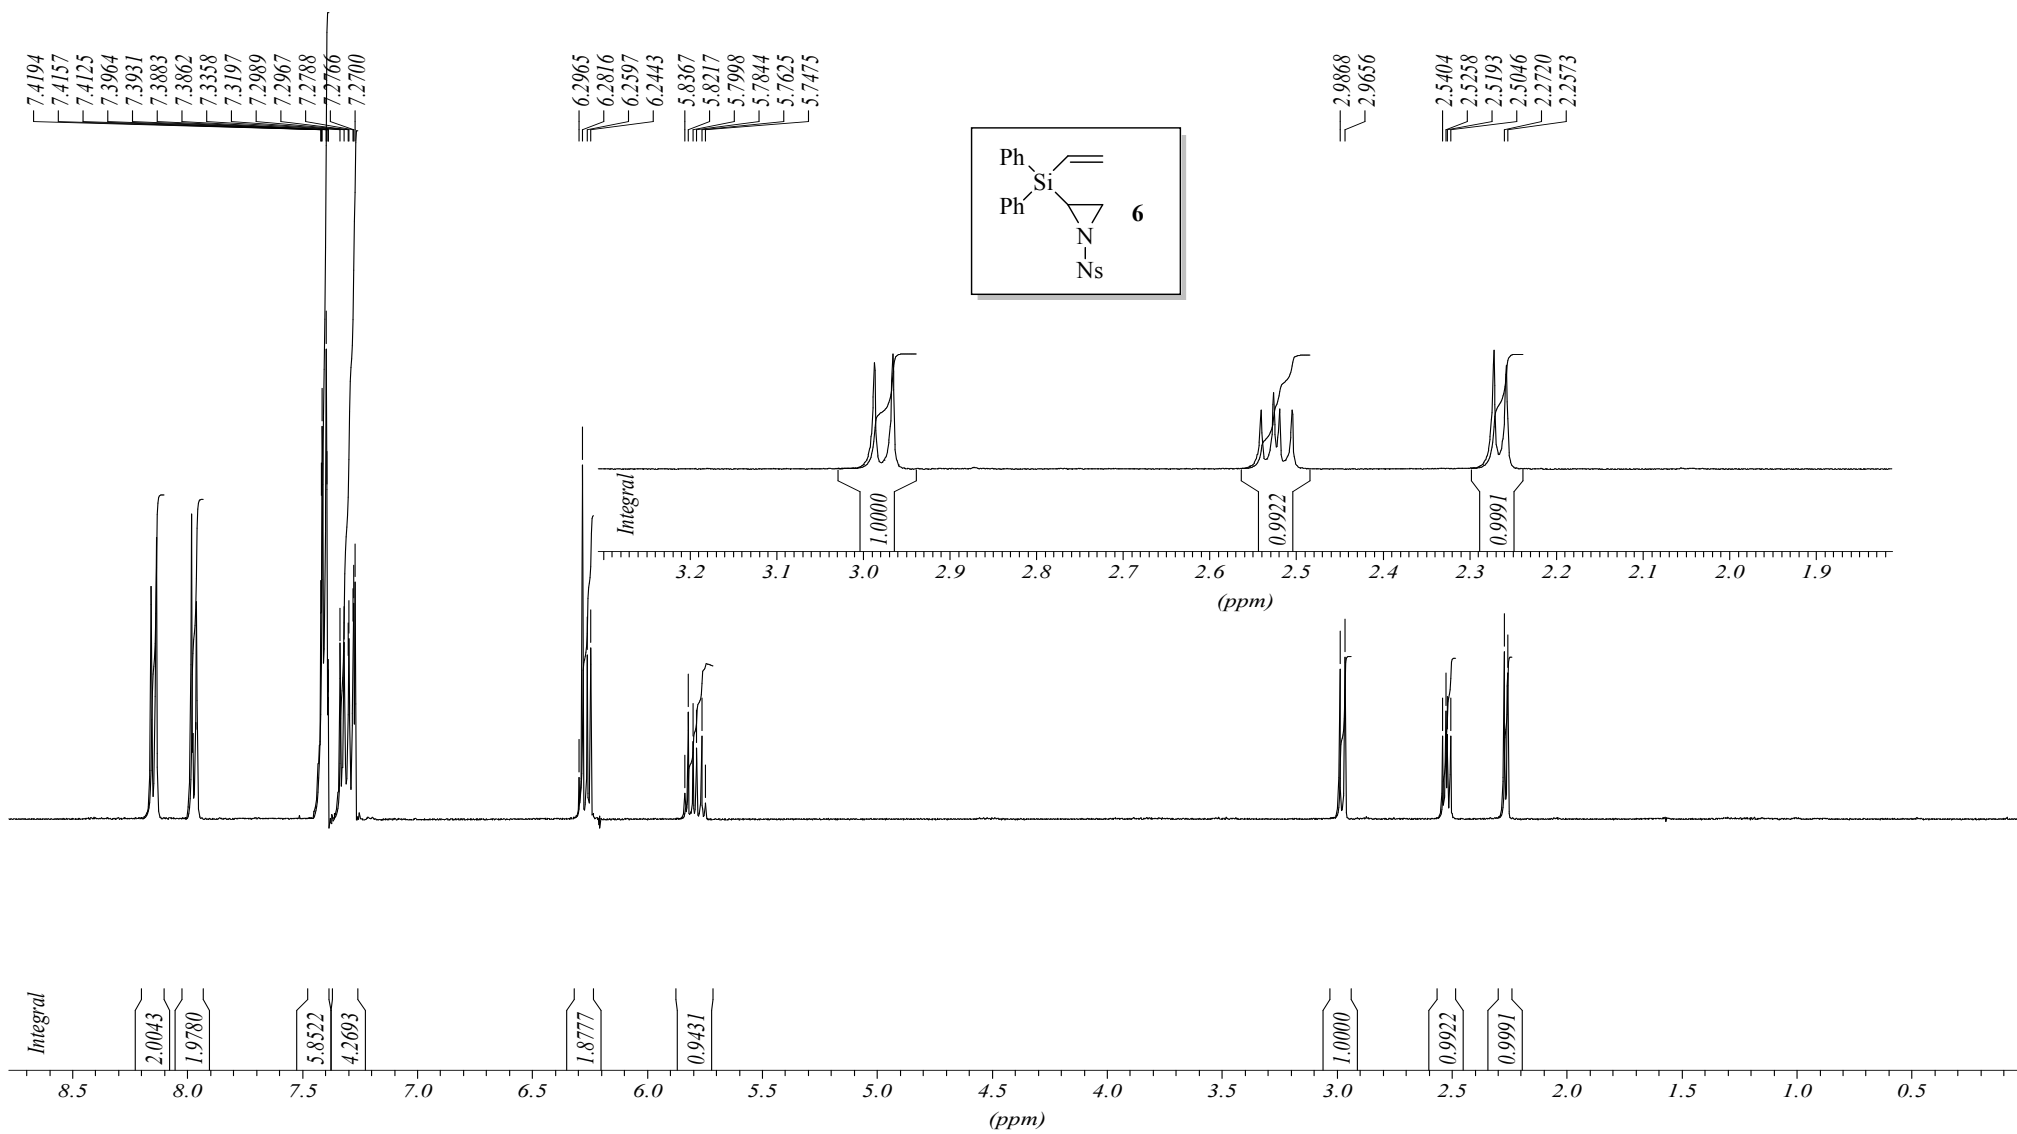

Figure S6. <sup>13</sup>C NMR spectrum of compound **6**

*2-(Diphenyl(vinyl)silyl)-1-((4-nitrophenyl)sulfonyl)aziridine, 6*

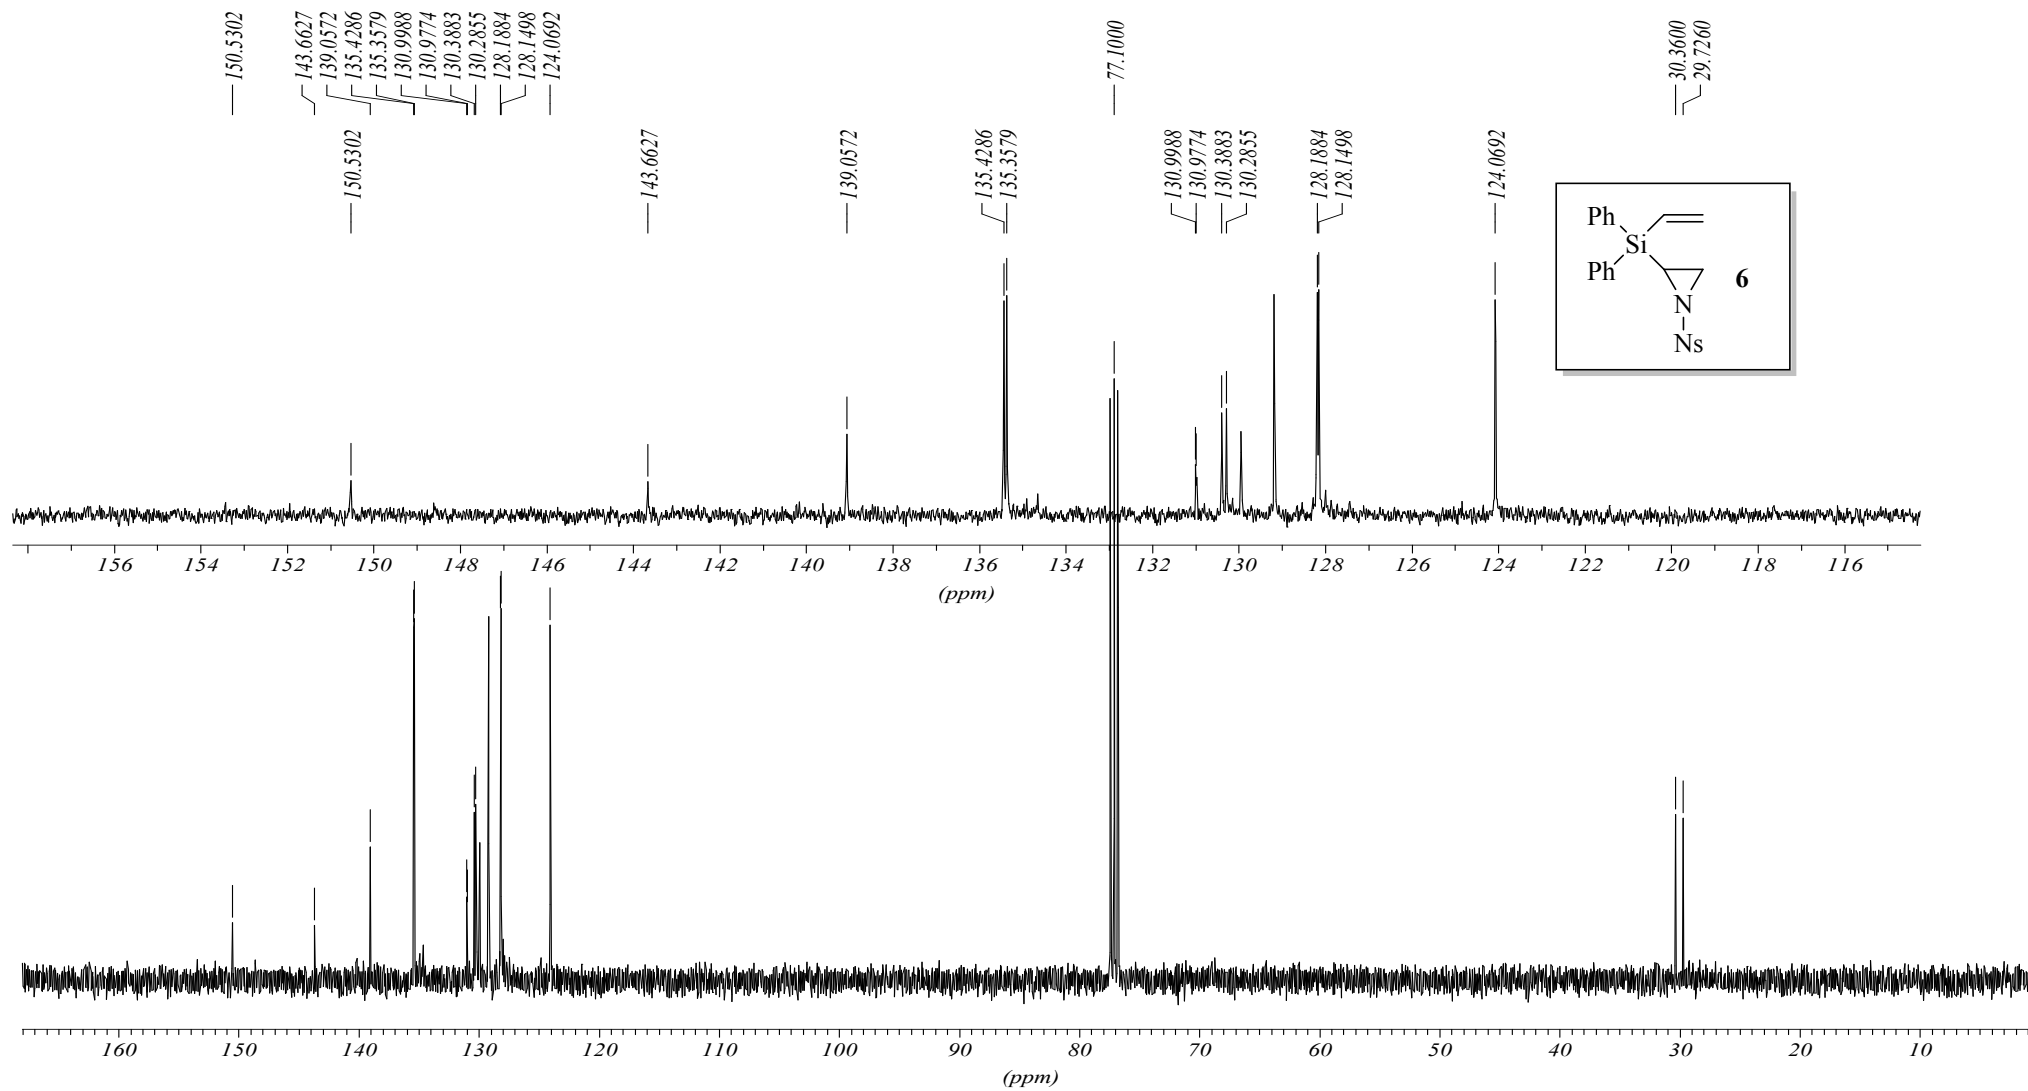

Figure S7. <sup>13</sup>C (J-mod) NMR spectrum of compound **6**

*2-(Diphenyl(vinyl)silyl)-1-((4-nitrophenyl)sulfonyl)aziridine, 6*

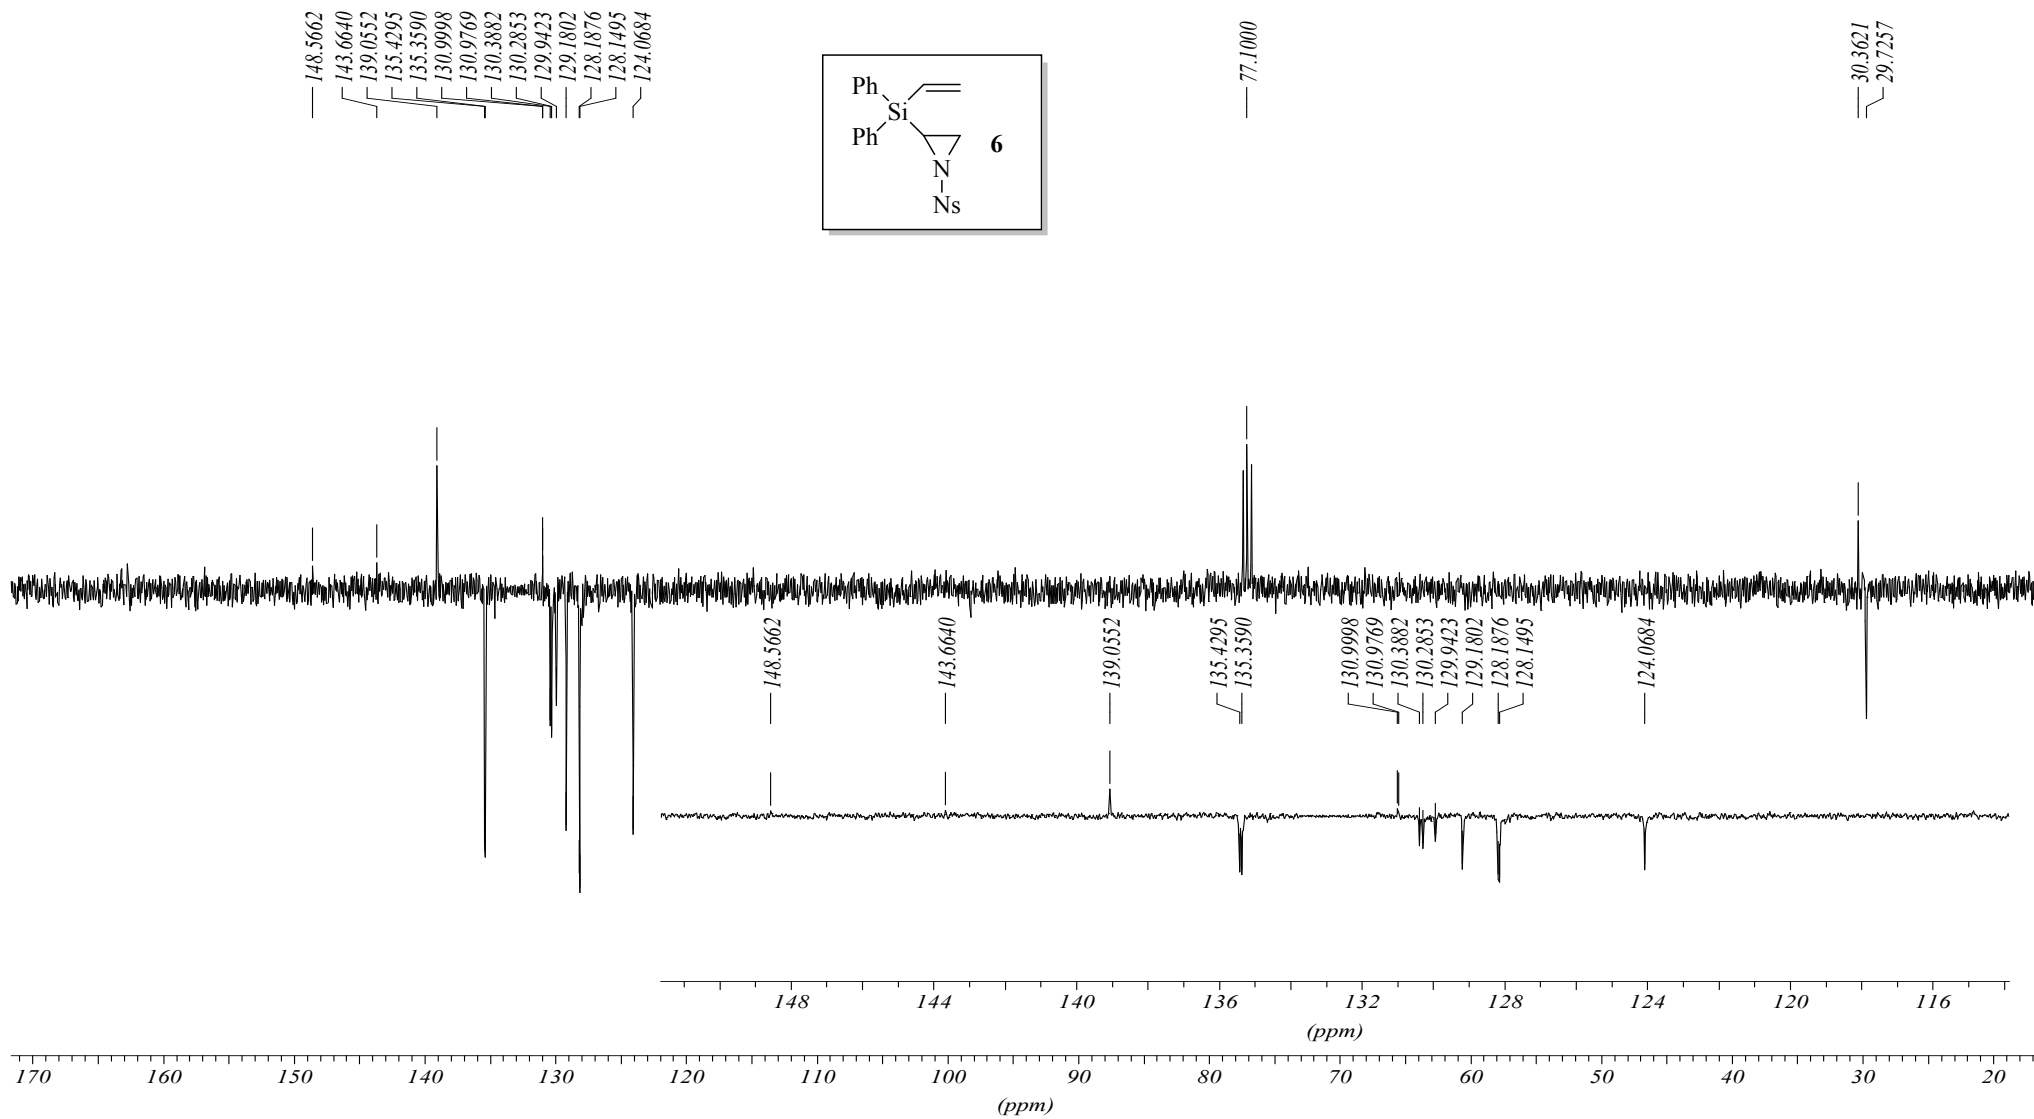



Figure S8. <sup>1</sup>H NMR spectrum of compound 7

*Bis(1-((4-nitrophenyl)sulfonyl)aziridin-2-yl)diphenylsilane, 7*

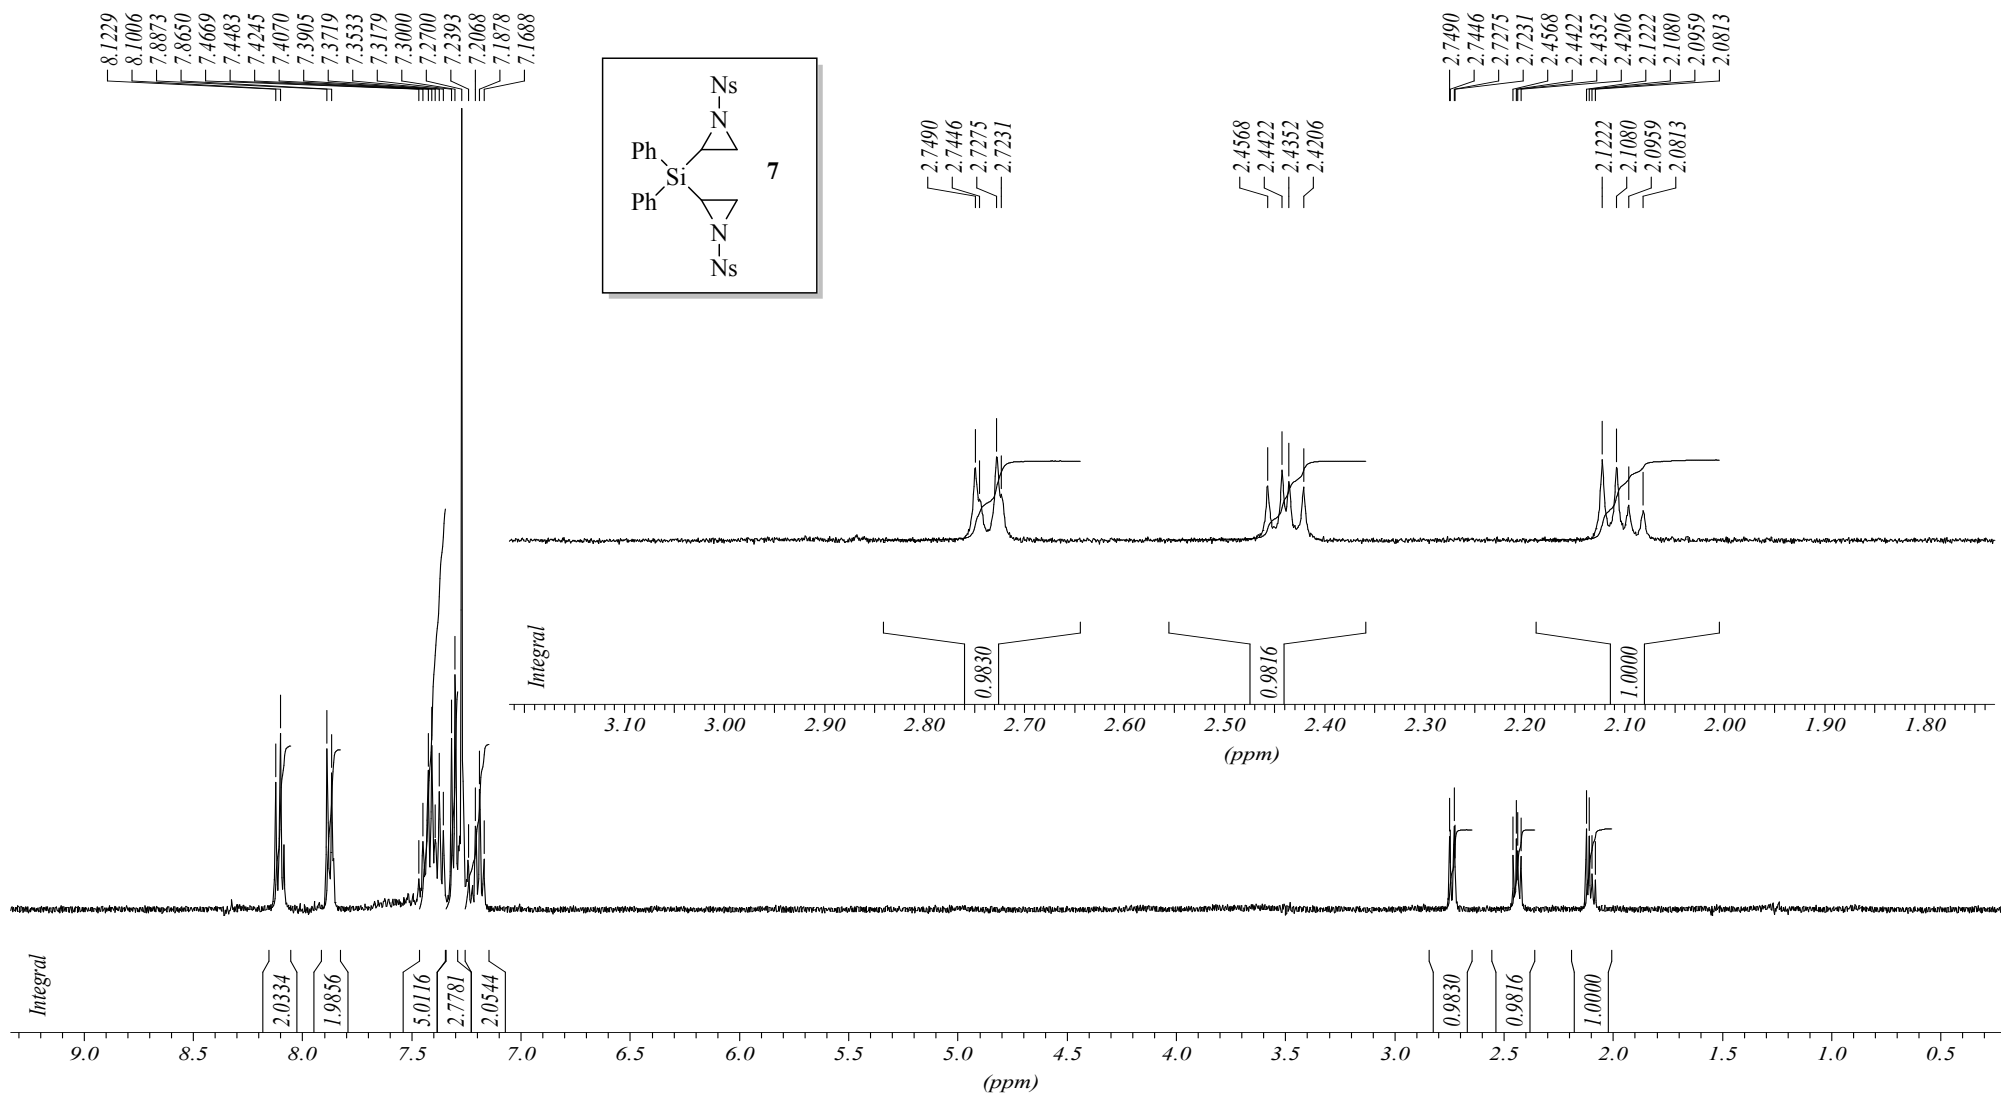

Figure S9. <sup>1</sup>H NMR spectrum of compound **9**

(1,2-Dibromoethyl)dimethyl(vinyl)silane, **9** (R = Me).

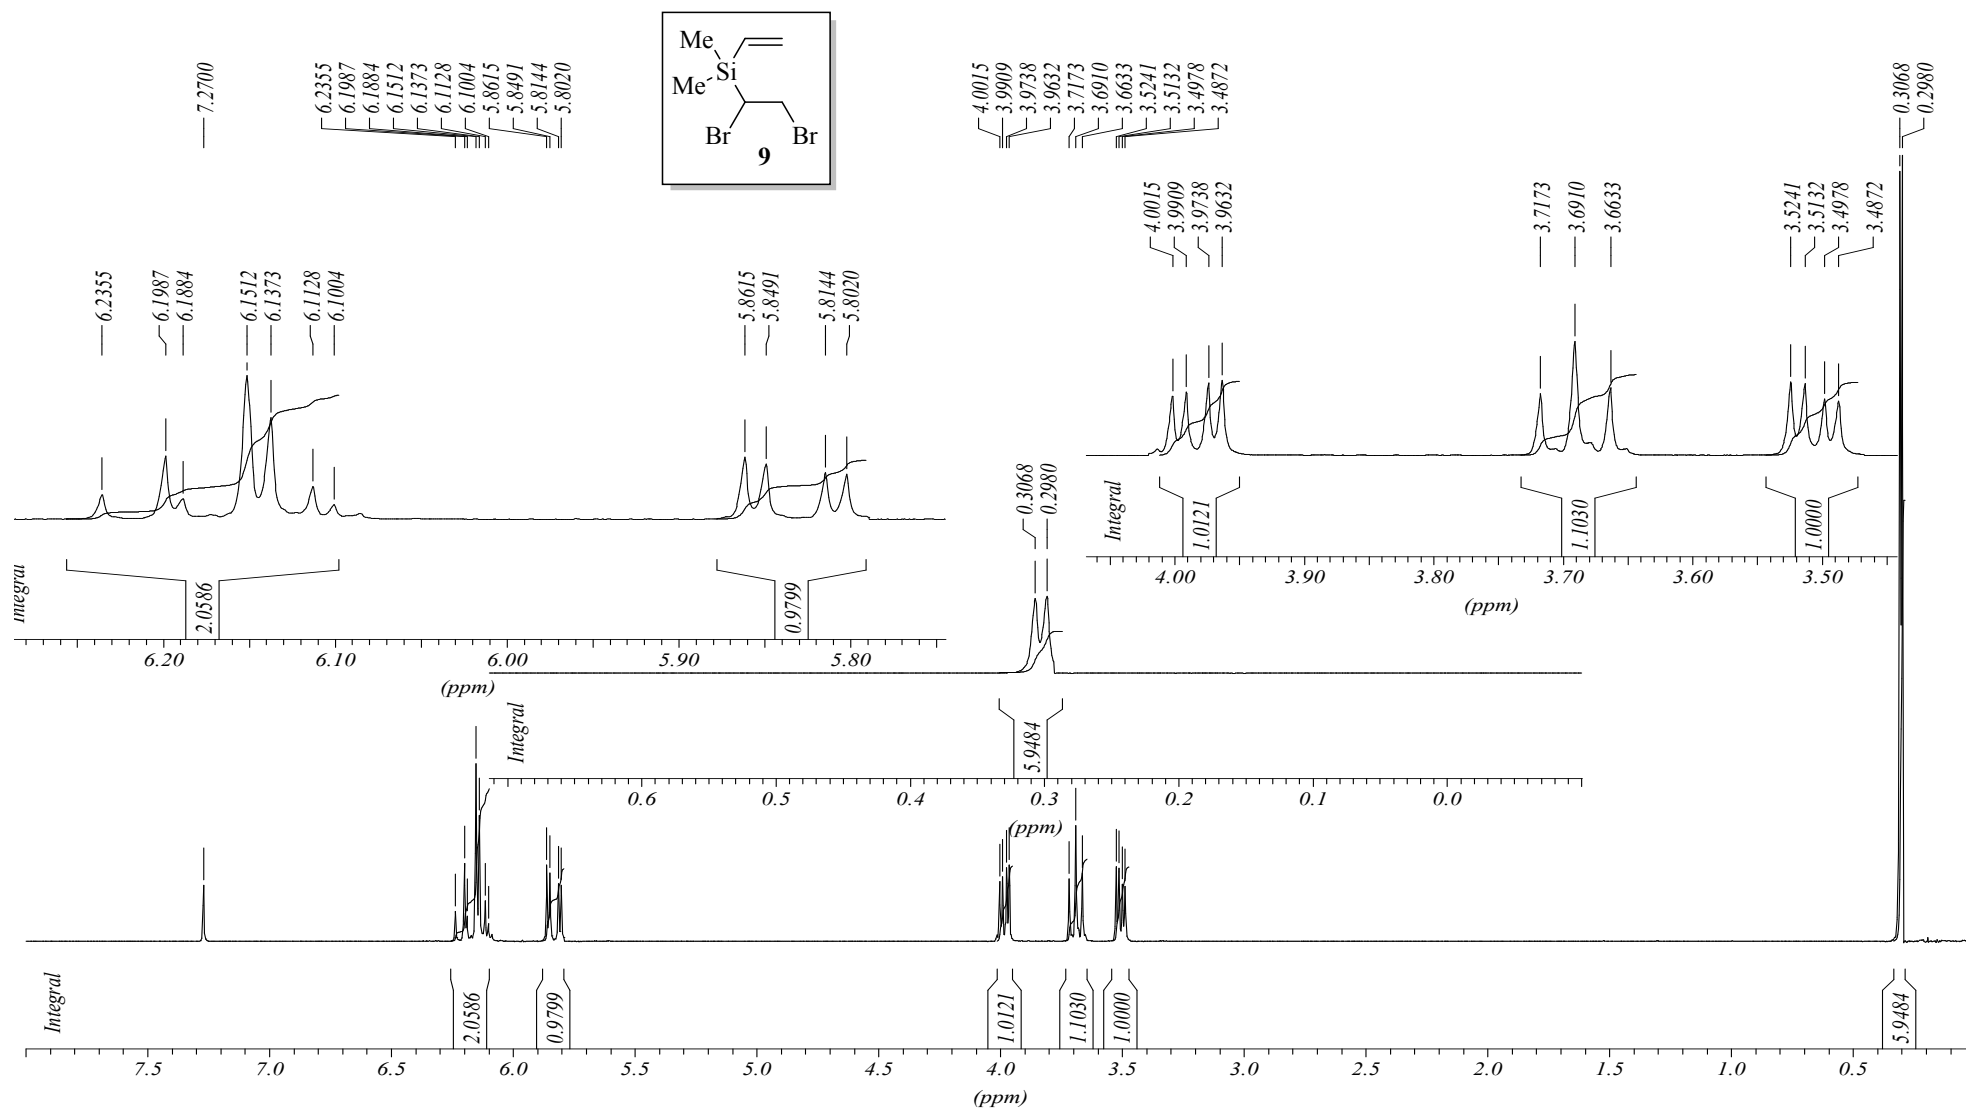

Figure S10.  $^{13}\text{C}$  NMR spectrum of compound **9**.

(1,2-Dibromoethyl)dimethyl(vinyl)silane, **9** (R = Me).

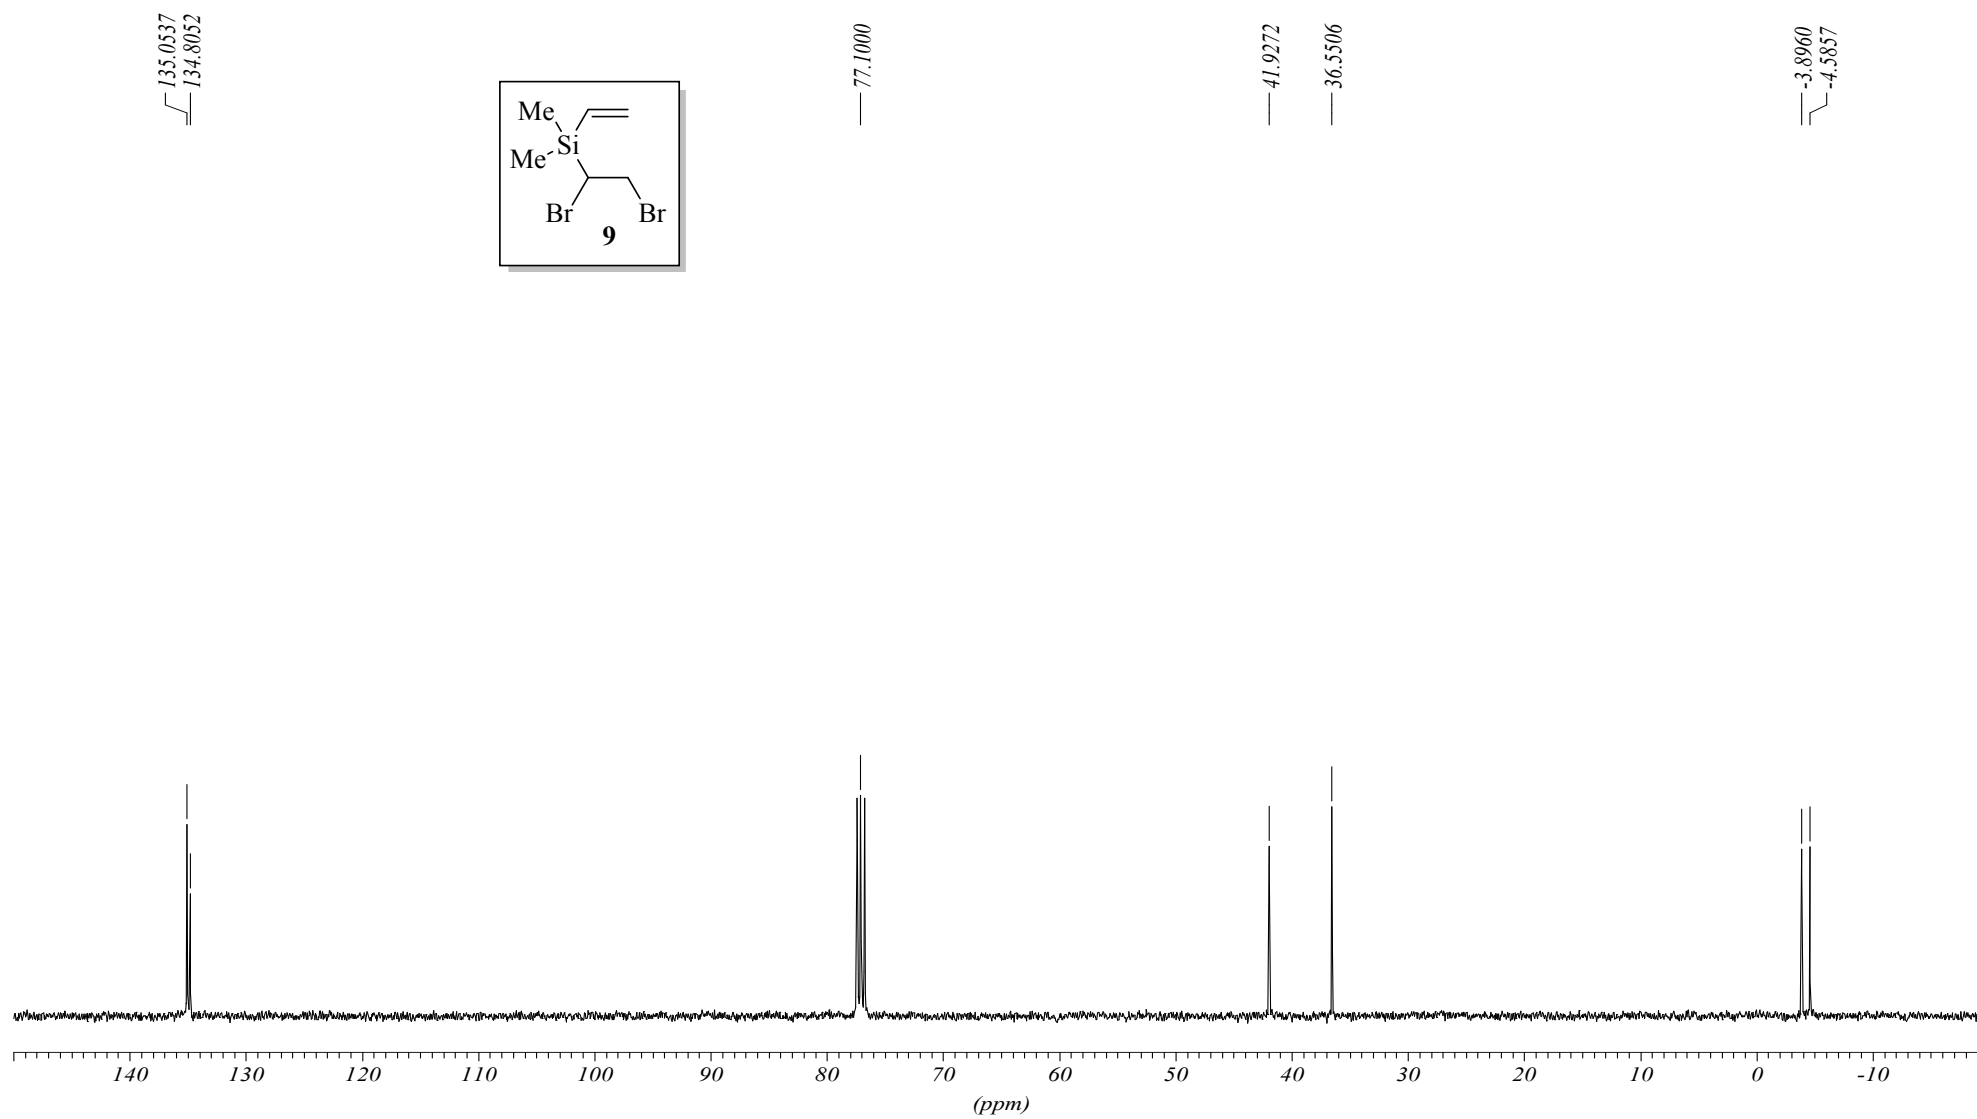

Figure S11. <sup>1</sup>H NMR spectrum of compound **9**

(1,2-dibromoethyl)diphenyl(vinyl)silane, **9** (R = Ph)

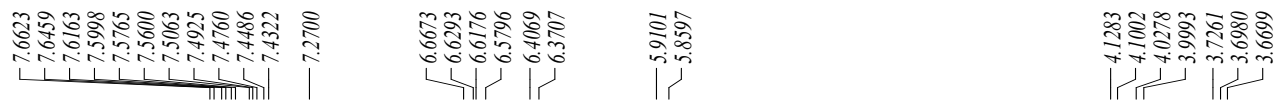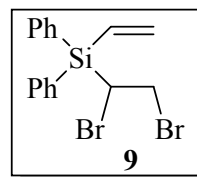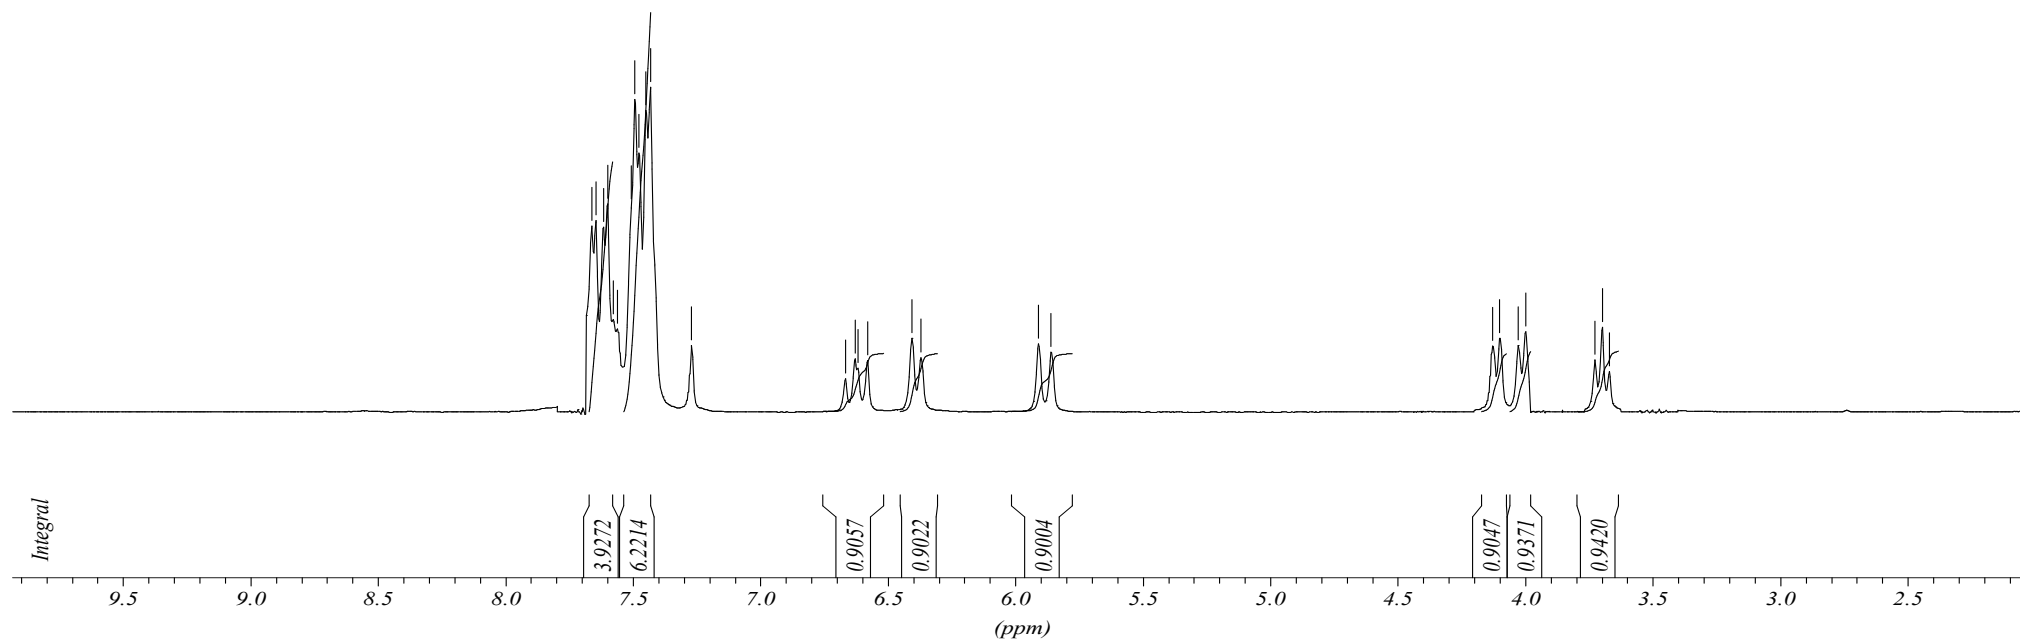

Figure S12.  $^{13}\text{C}$  NMR spectrum of compound **9**  
(1,2-dibromoethyl)diphenyl(vinyl)silane, **9** (R = Ph)

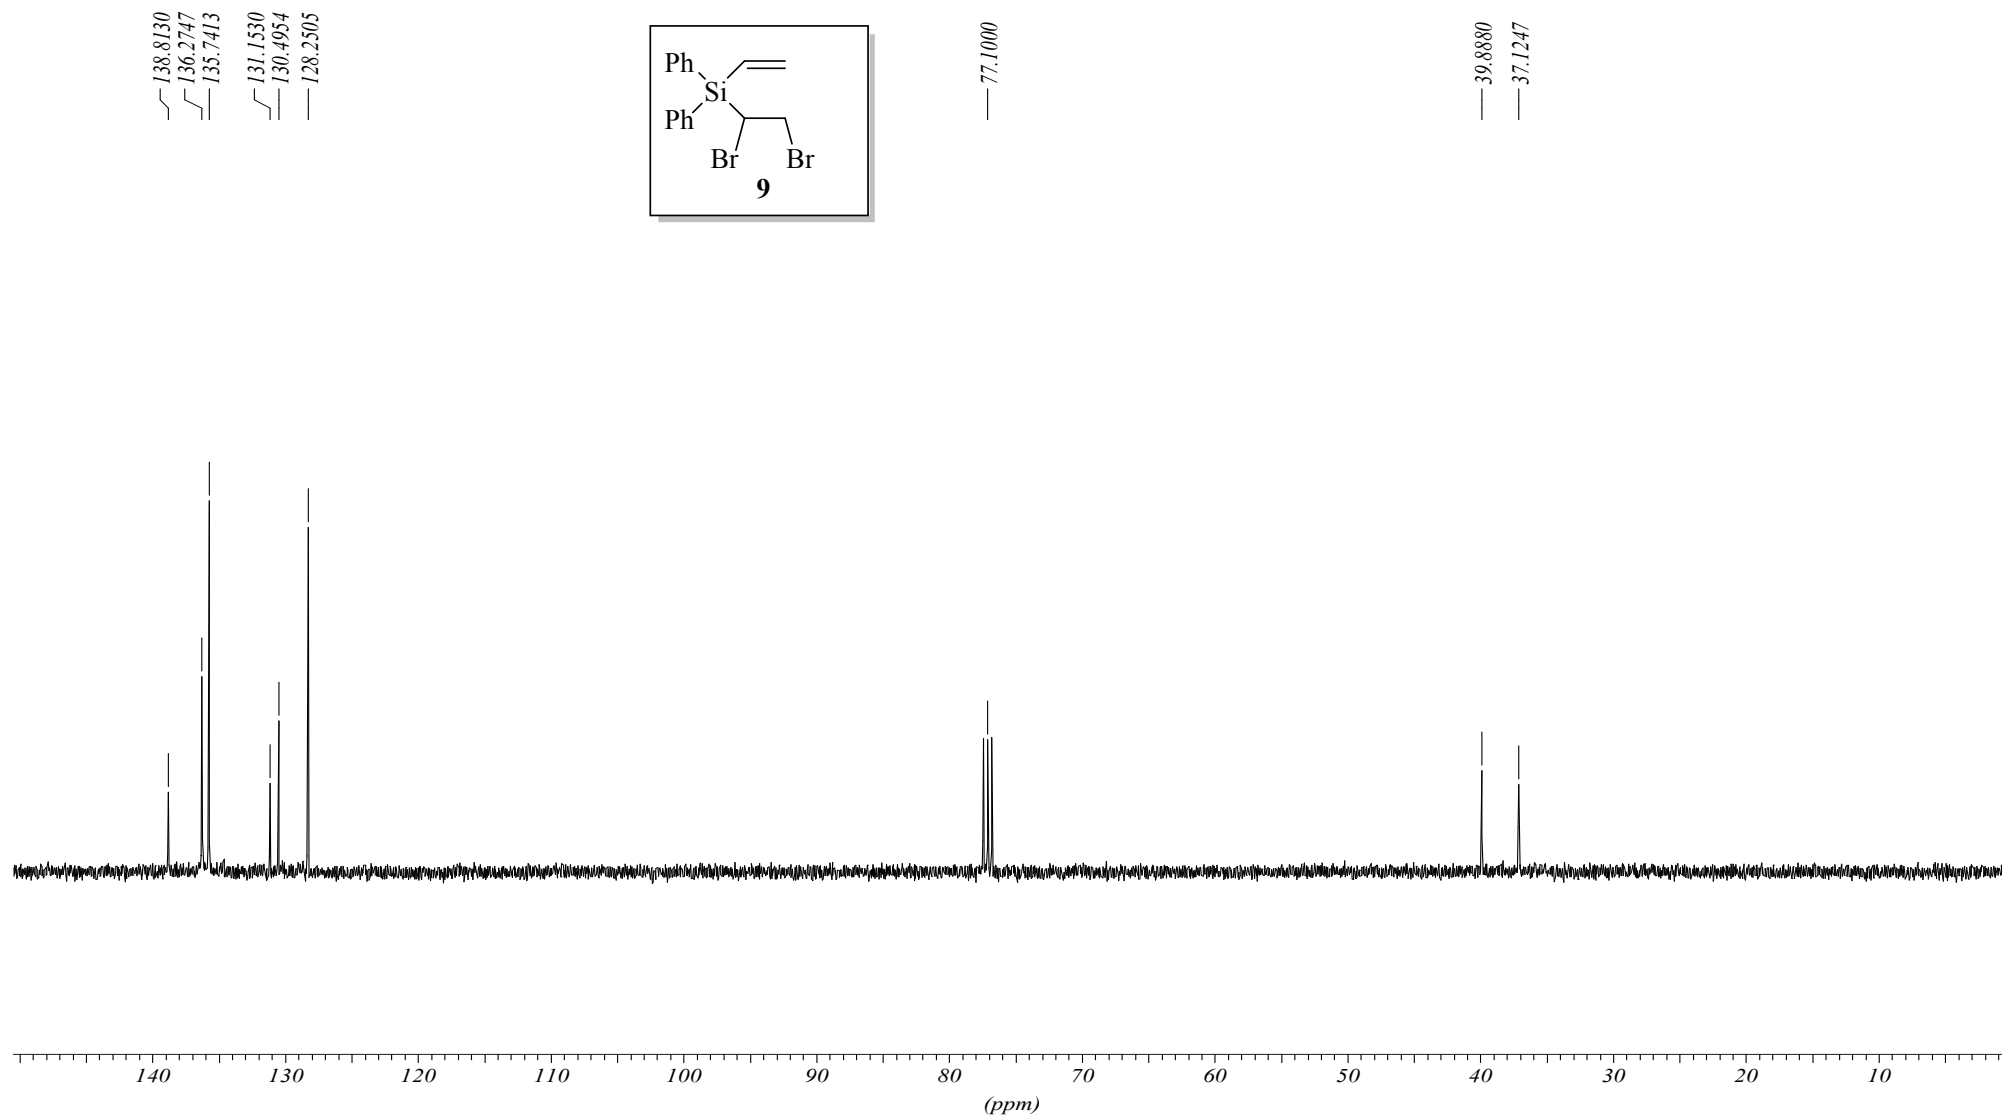

Figure S13. <sup>1</sup>H NMR spectrum of compound **10**

*(1,2-dibromoethyl)diphenyl(vinyl)silane, 10*

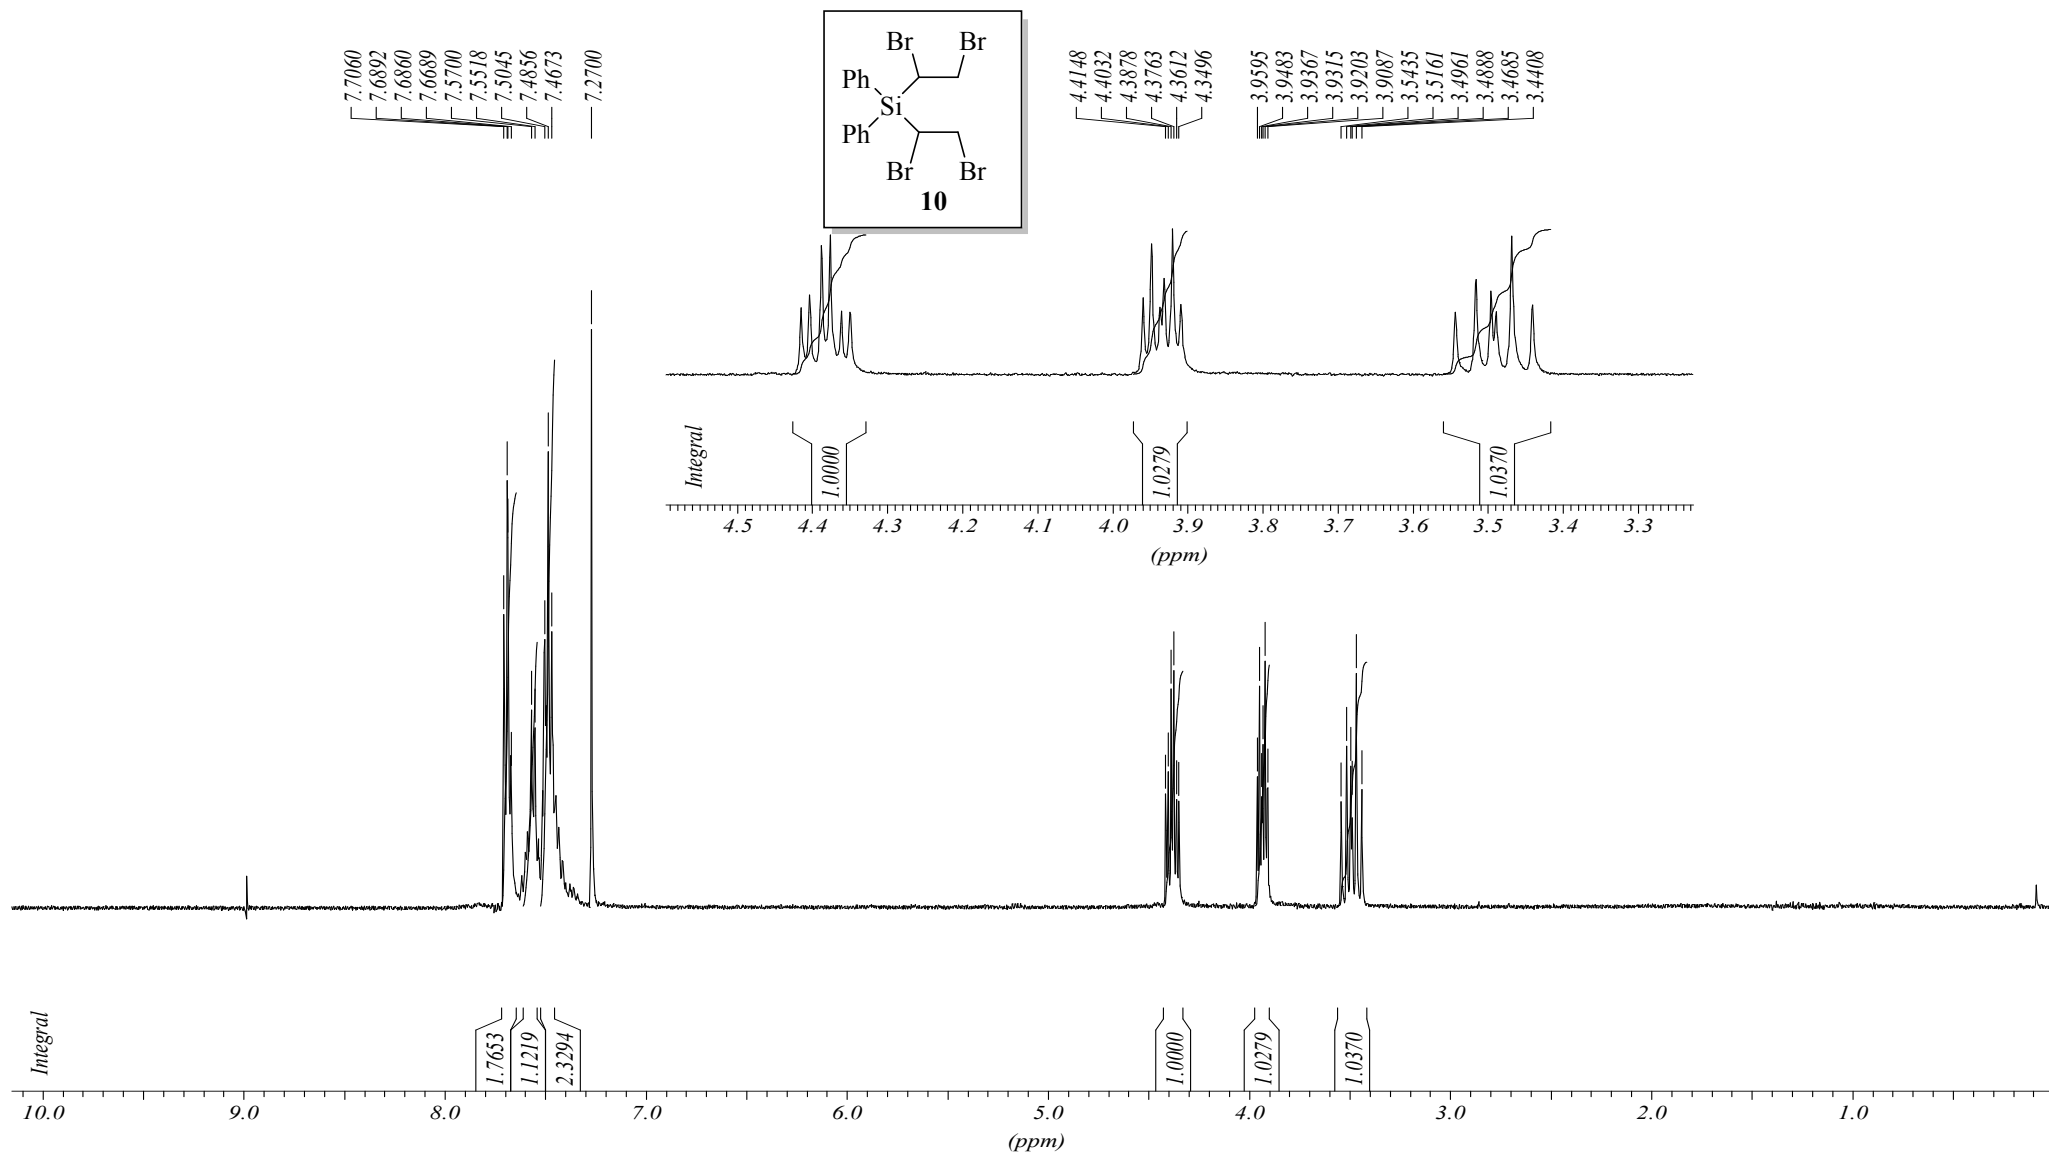

Figure S14.  $^{13}\text{C}$  NMR spectrum of compound **10**

*(1,2-dibromoethyl)diphenyl(vinyl)silane, 10*

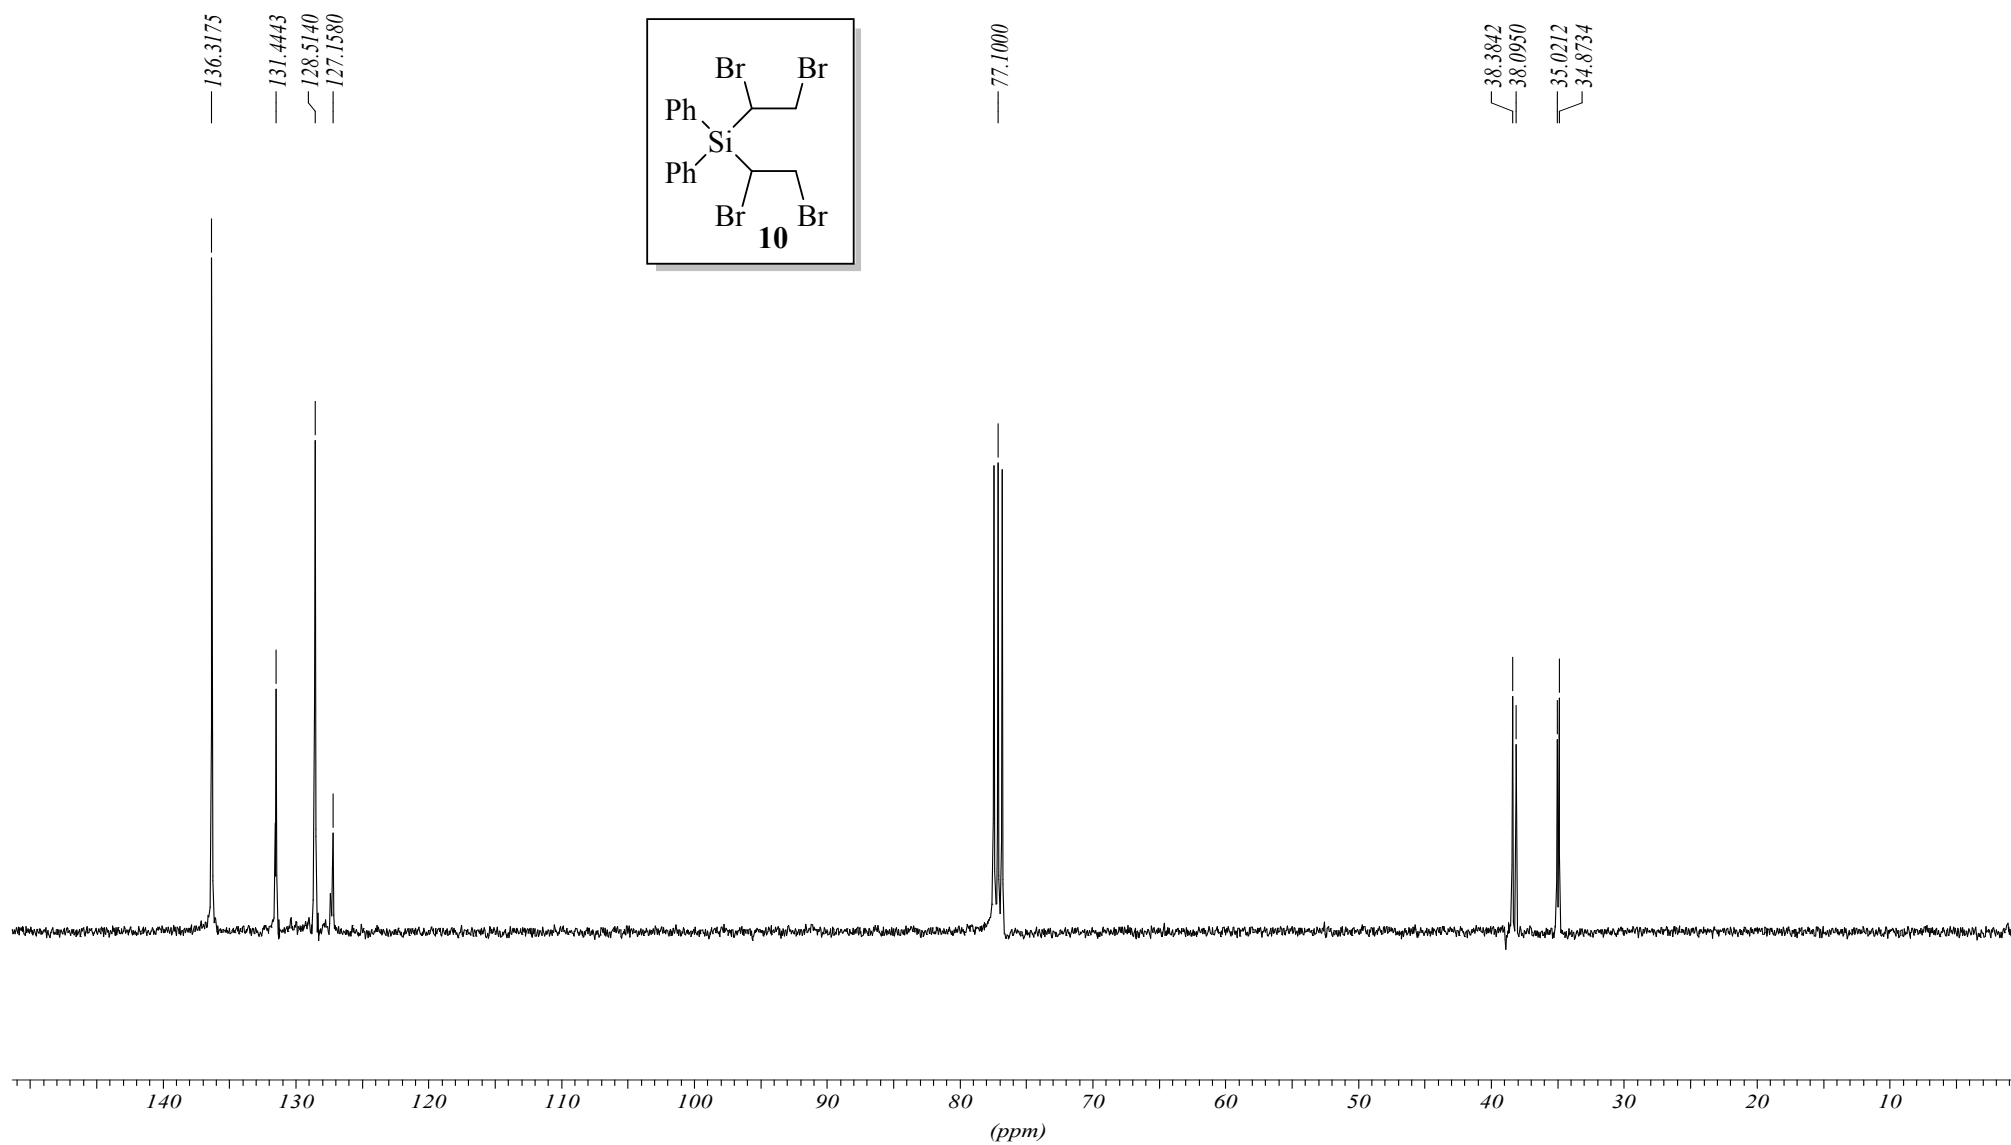

Figure S15. <sup>1</sup>H NMR spectrum of compound **11a**

*N*-(2-bromo-2-(diphenyl(vinyl)silyl)ethyl)trifluoromethanesulfonamide, **11a** (R = Ph).

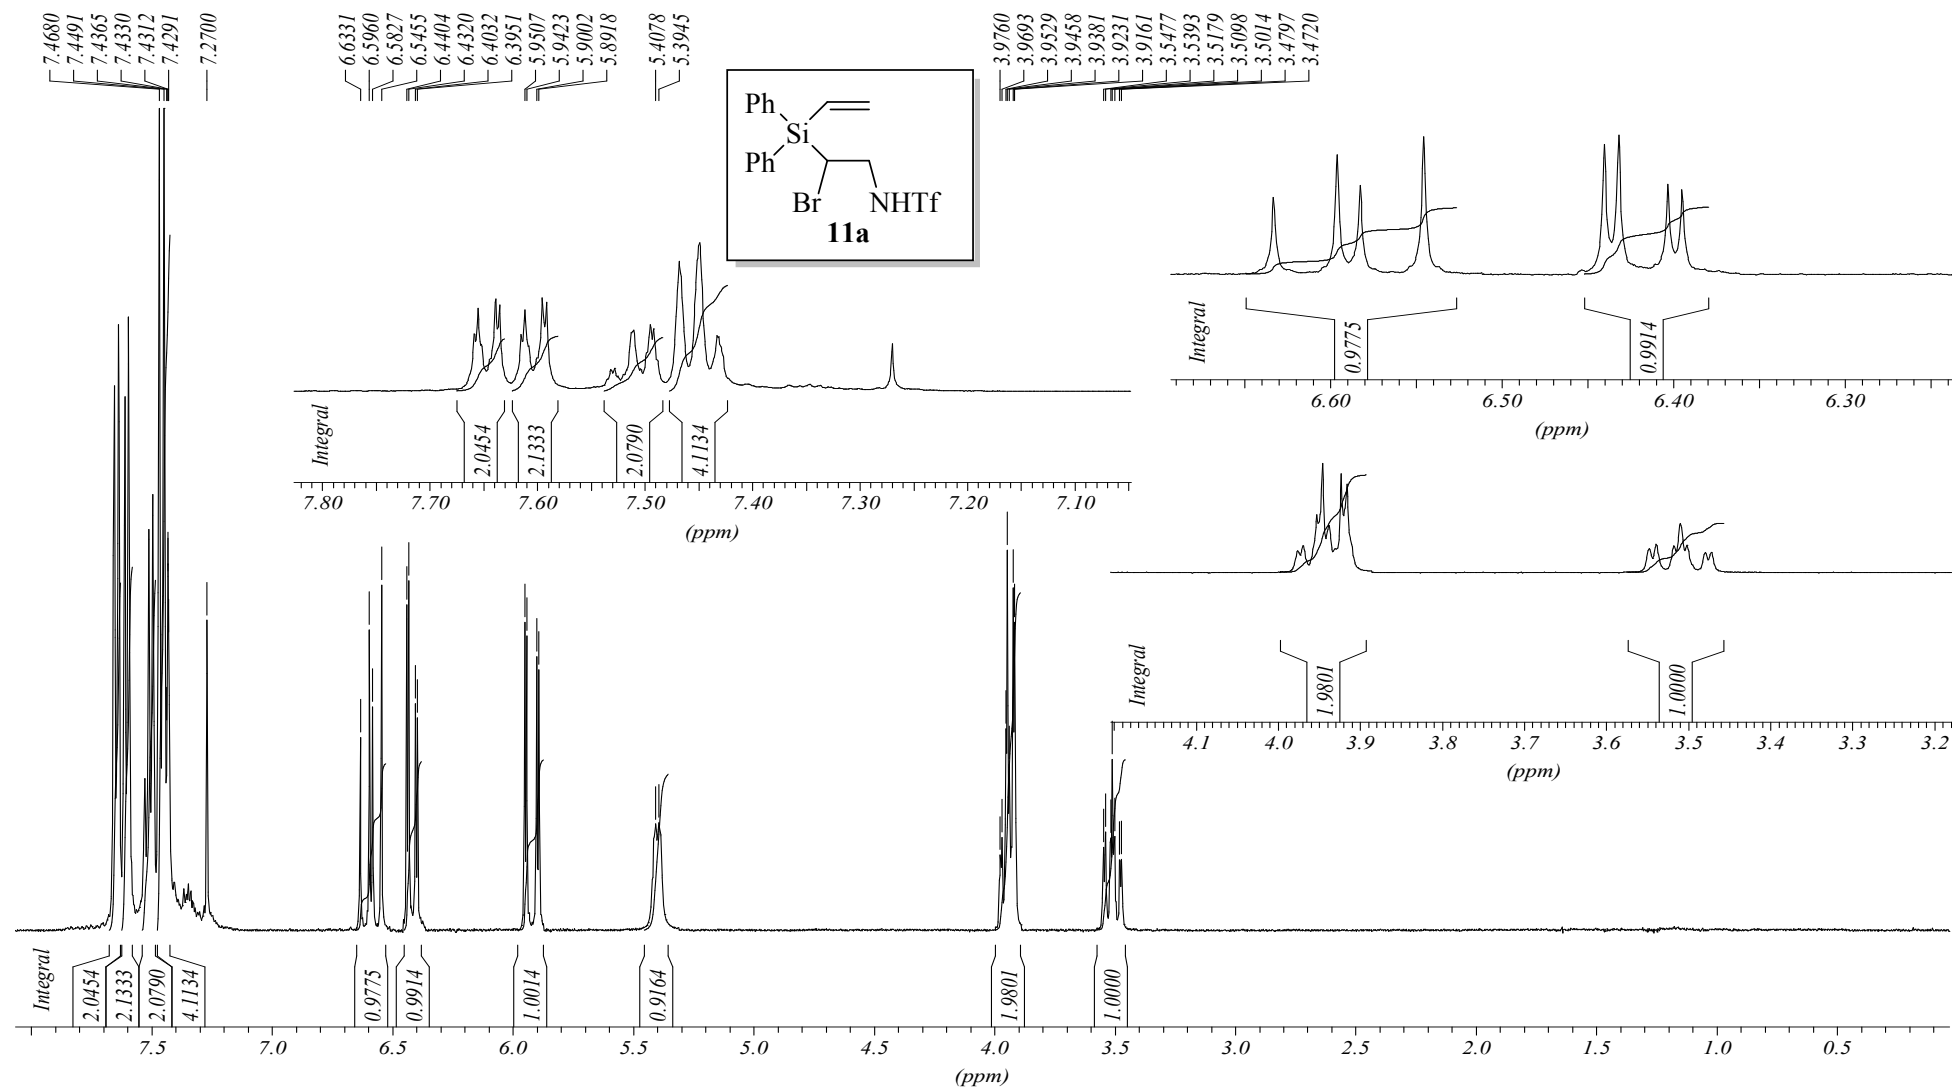



Figure S16.  $^{13}\text{C}$  NMR spectrum of compound **11a**

*N*-(2-bromo-2-(diphenyl(vinyl)silyl)ethyl)trifluoromethanesulfonamide, **11a** (R = Ph).

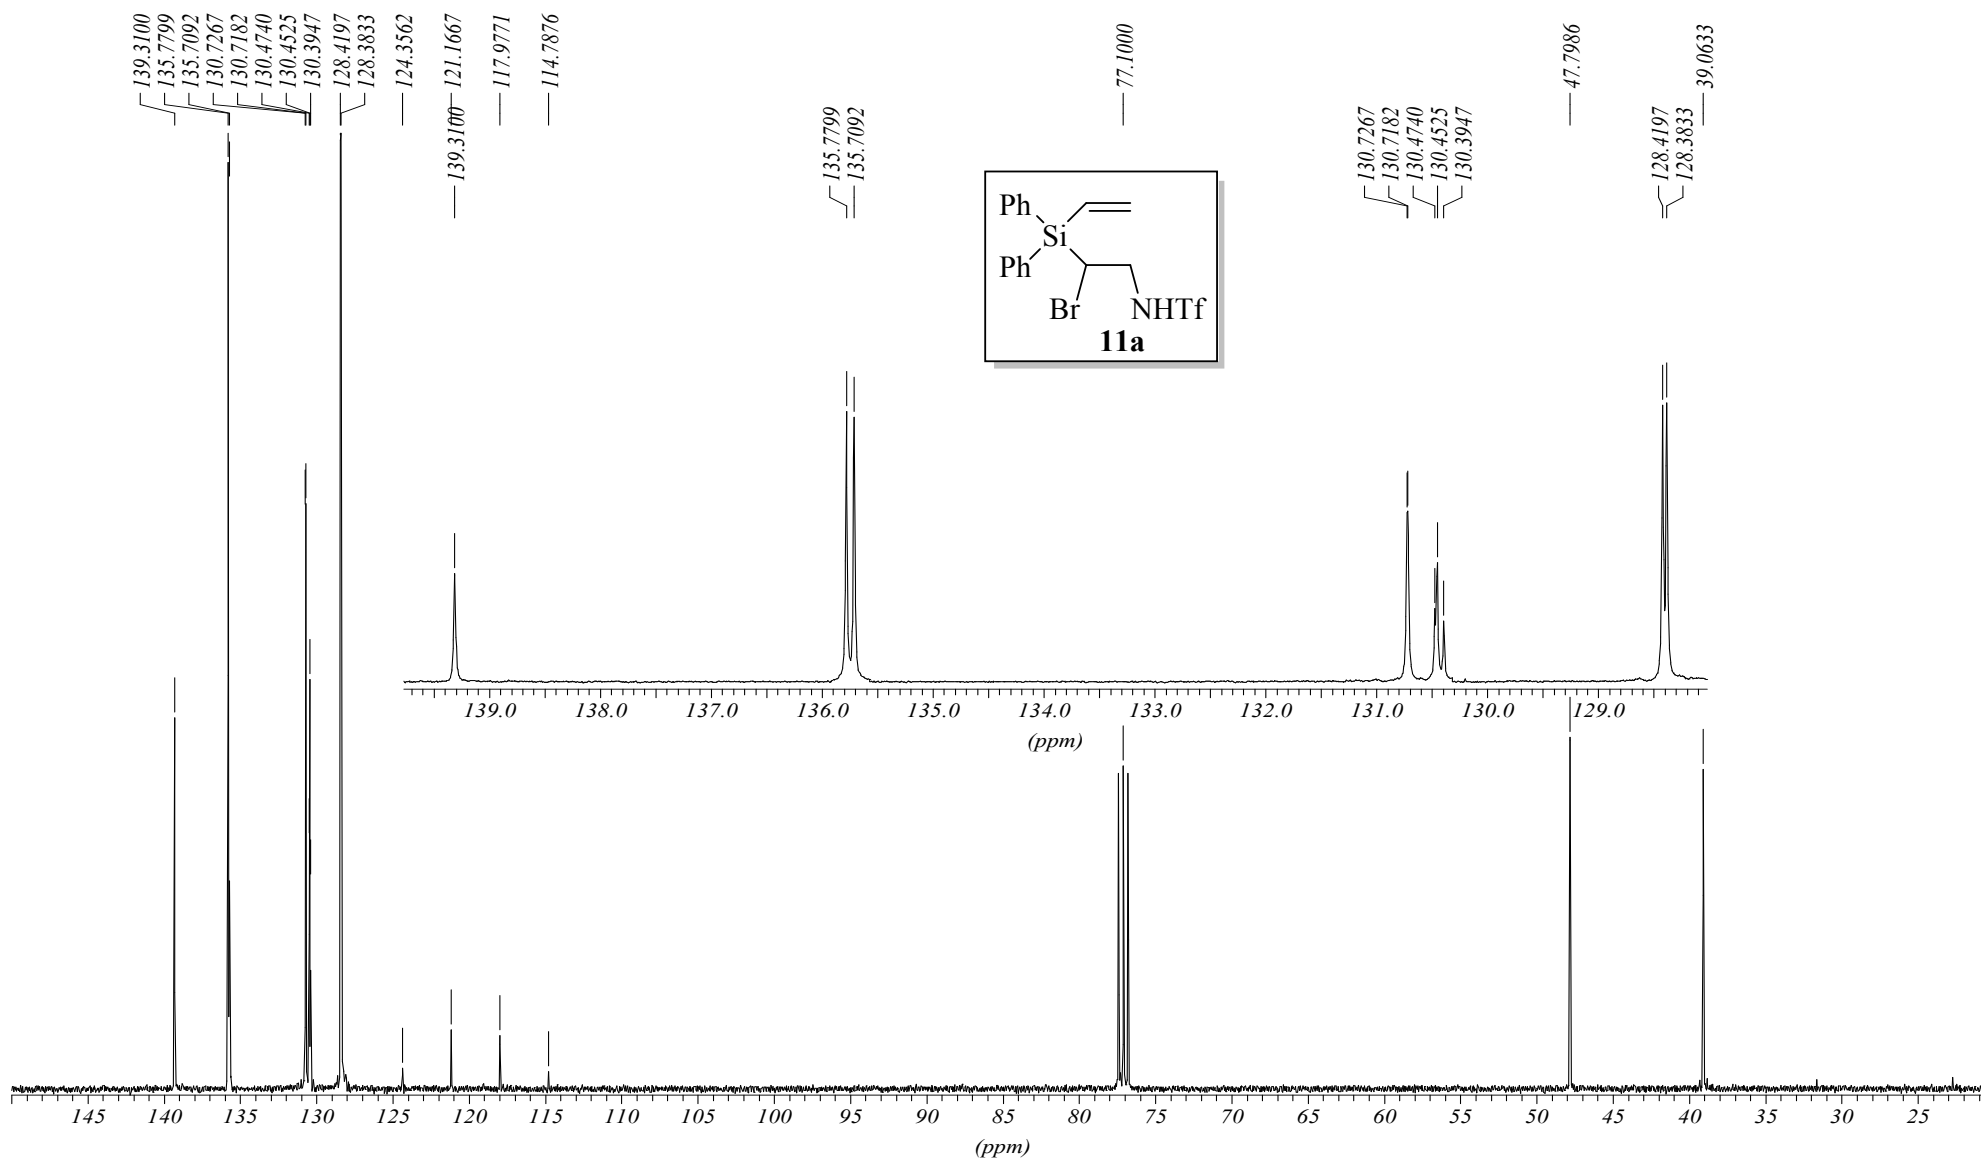

Figure S17. <sup>1</sup>H NMR spectrum of compound **11a**

*N*-(2-bromo-2-(dimethyl(vinyl)silyl)ethyl)trifluoromethanesulfonamide, **11a** (R = Me).

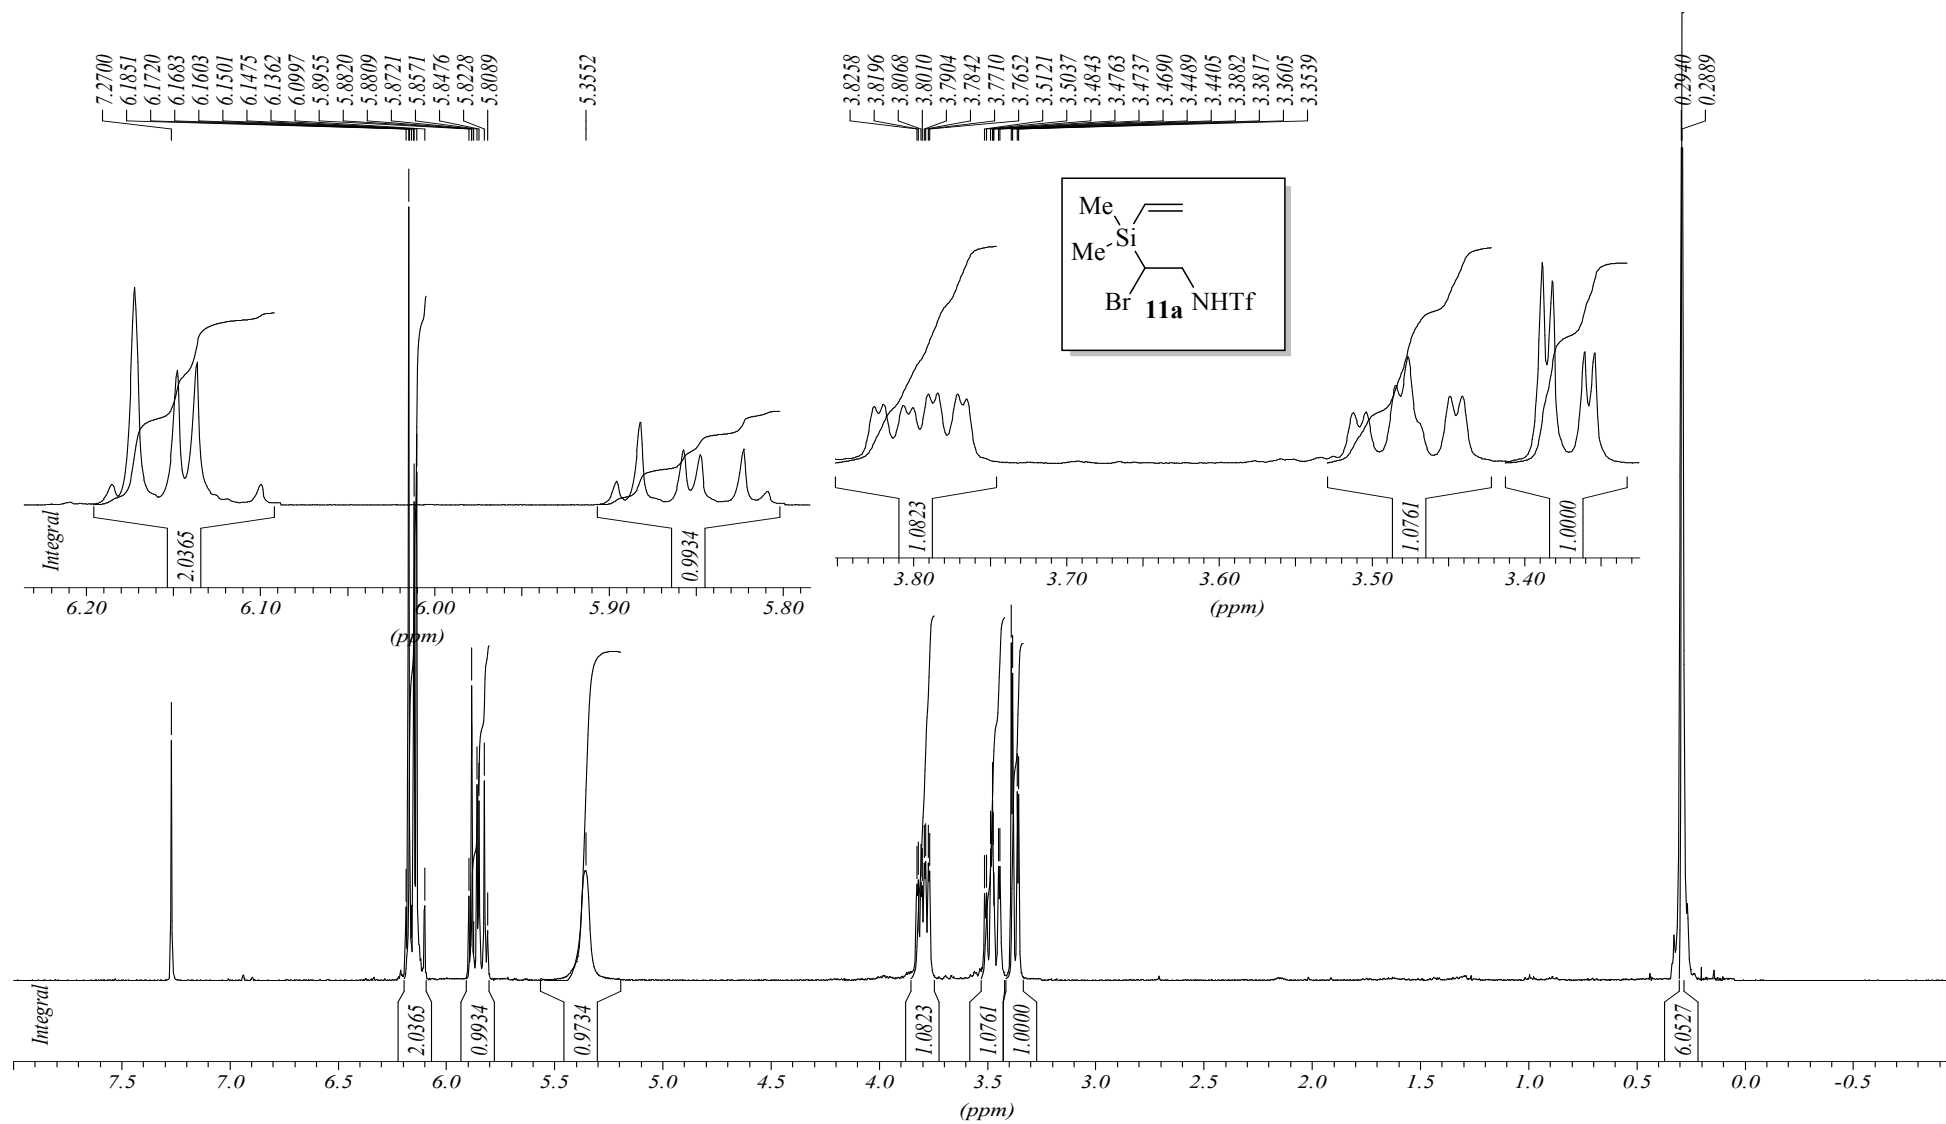

Figure S18.  $^{13}\text{C}$  NMR spectrum of compound **11a**

*N*-(2-bromo-2-(dimethyl(vinyl)silyl)ethyl)trifluoromethanesulfonamide, **11a** (R = Me).

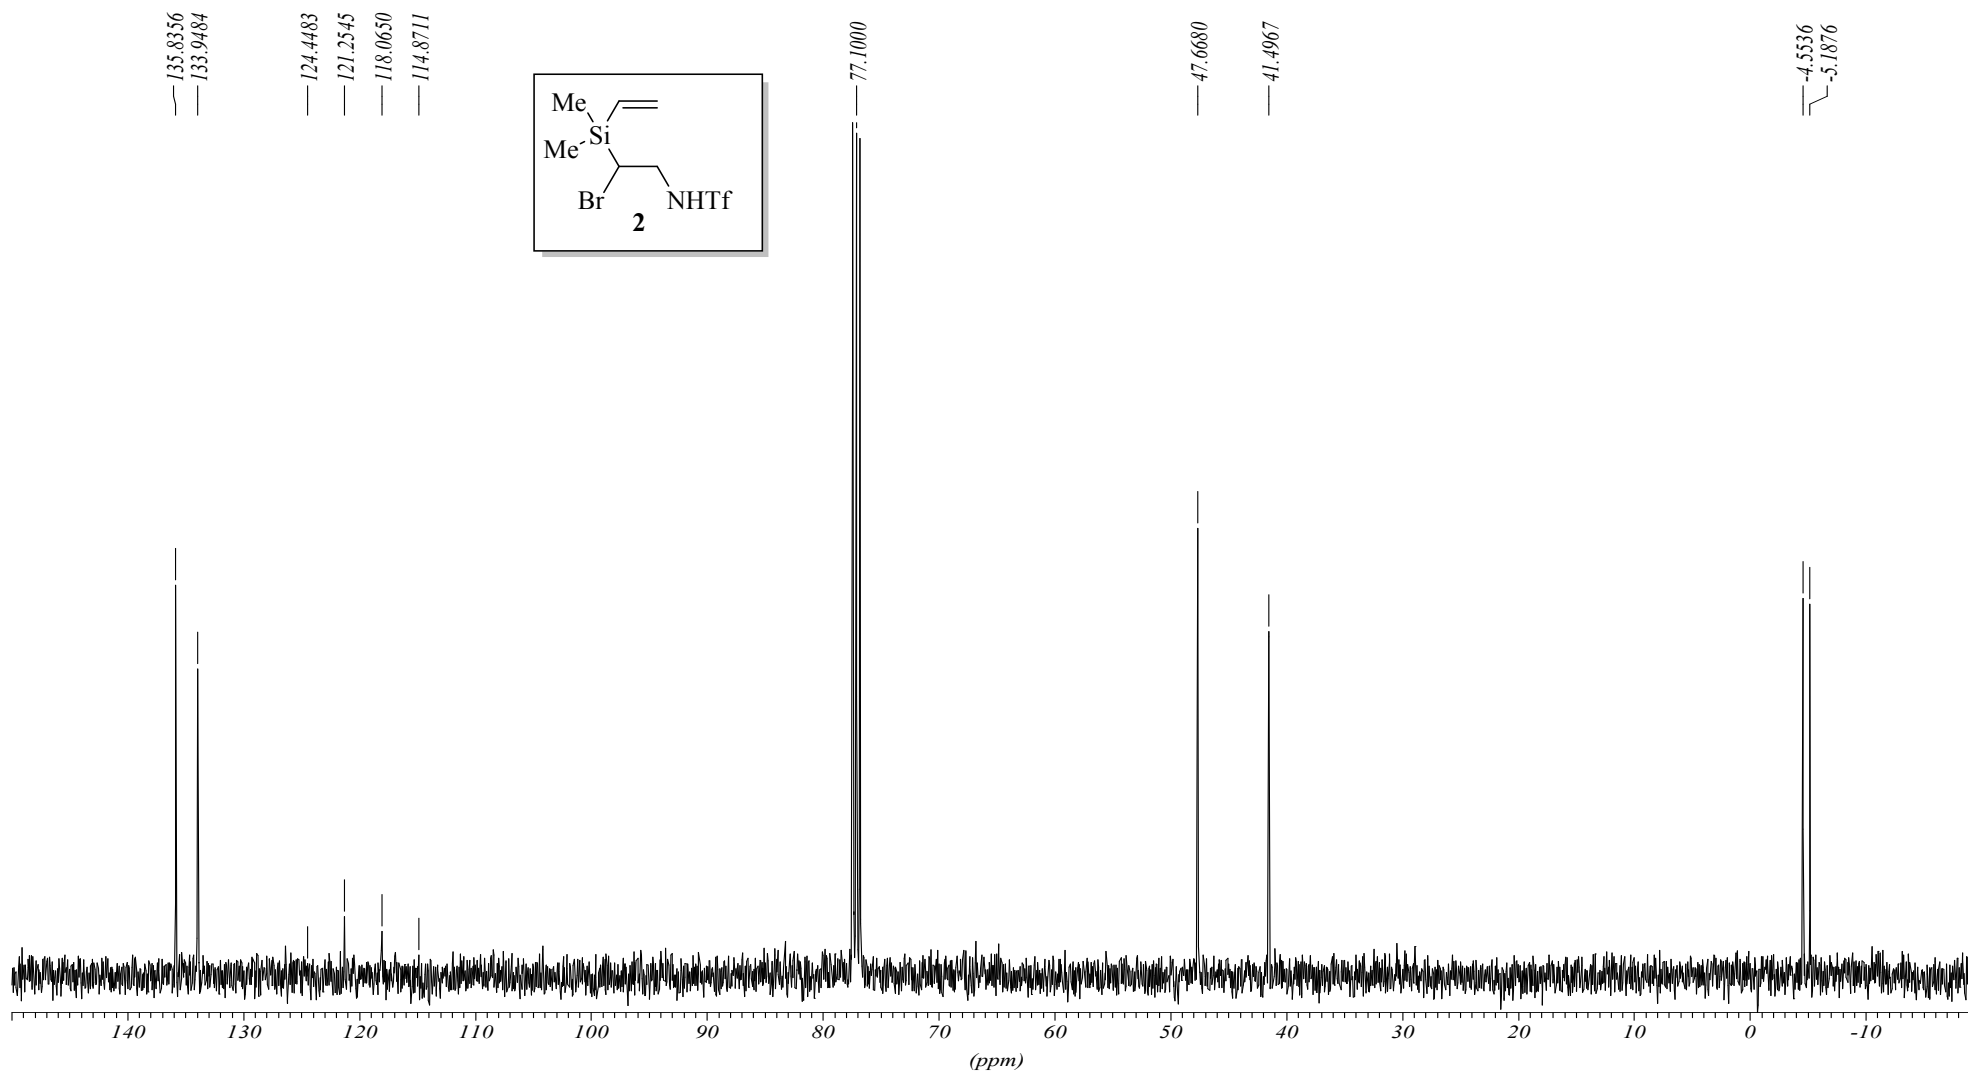

Figure S19. <sup>1</sup>H NMR spectrum of compound **11c**

*N*-(2-Bromo-2-(dimethyl(vinyl)silyl)ethyl)-4-methylbenzenesulfonamide, **11c** (R = Me).

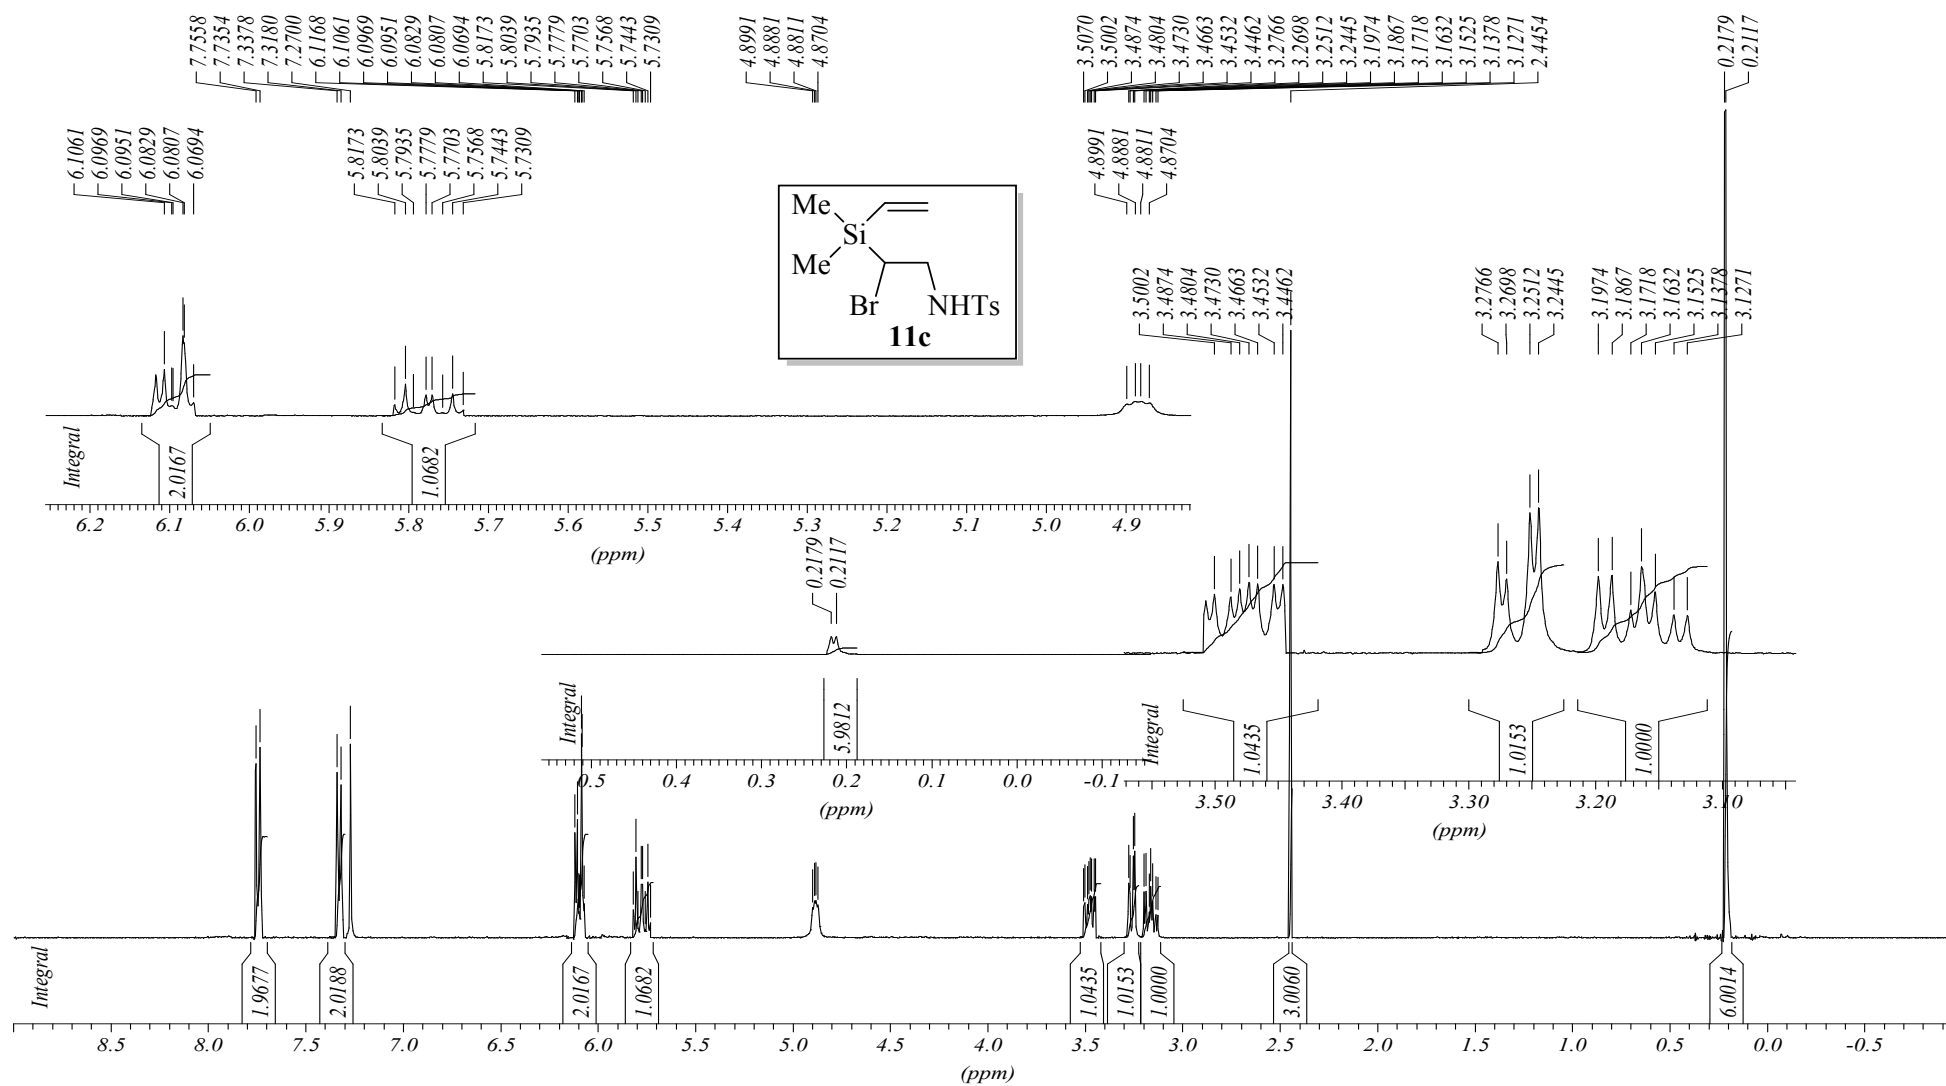

Figure S20.  $^{13}\text{C}$  NMR spectrum of compound **11c**

*N*-(2-Bromo-2-(dimethyl(vinyl)silyl)ethyl)-4-methylbenzenesulfonamide, **11c** (R = Me).

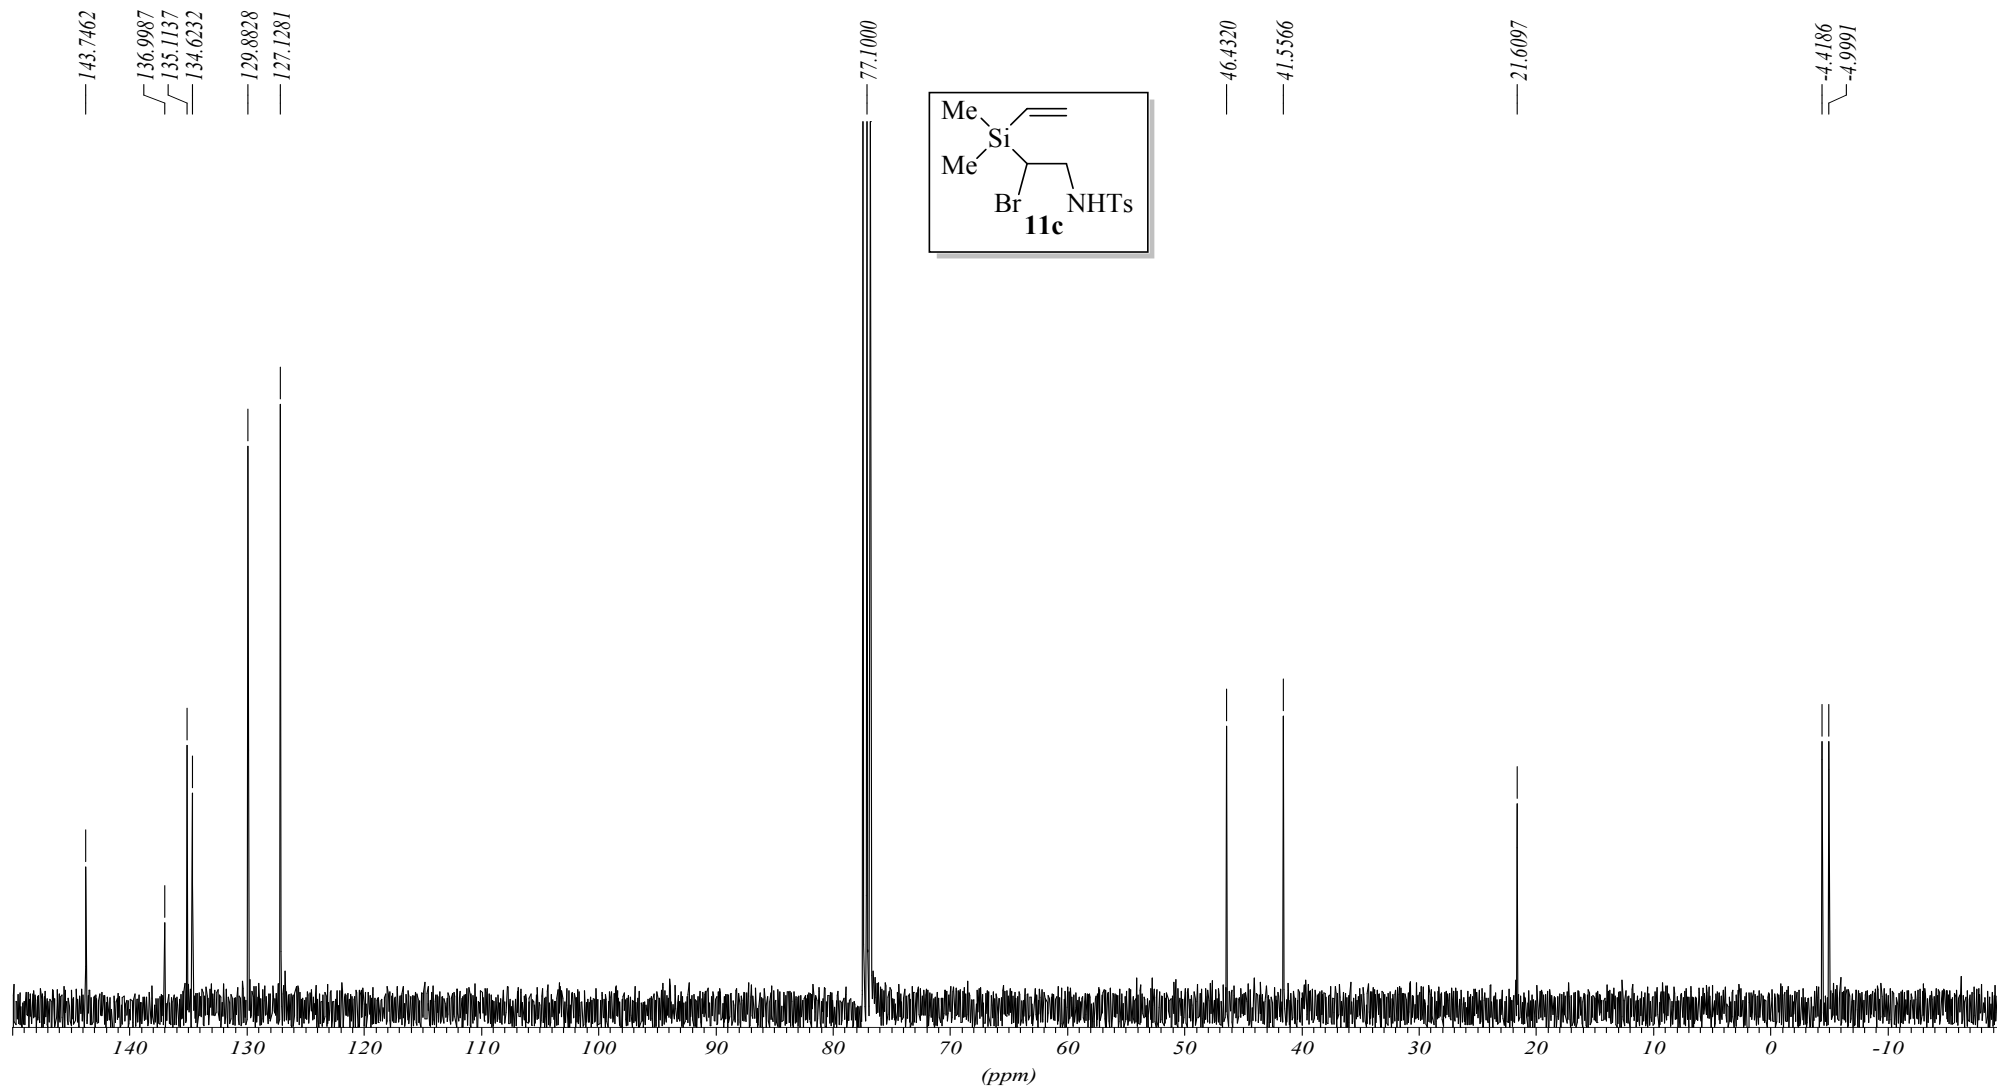

Figure S21. <sup>1</sup>H NMR spectrum of compound **11d**

*N*-(2-Bromo-2-(dimethyl(vinyl)silyl)ethyl)-4-nitrobenzenesulfonamide, **11d** (R = Me).

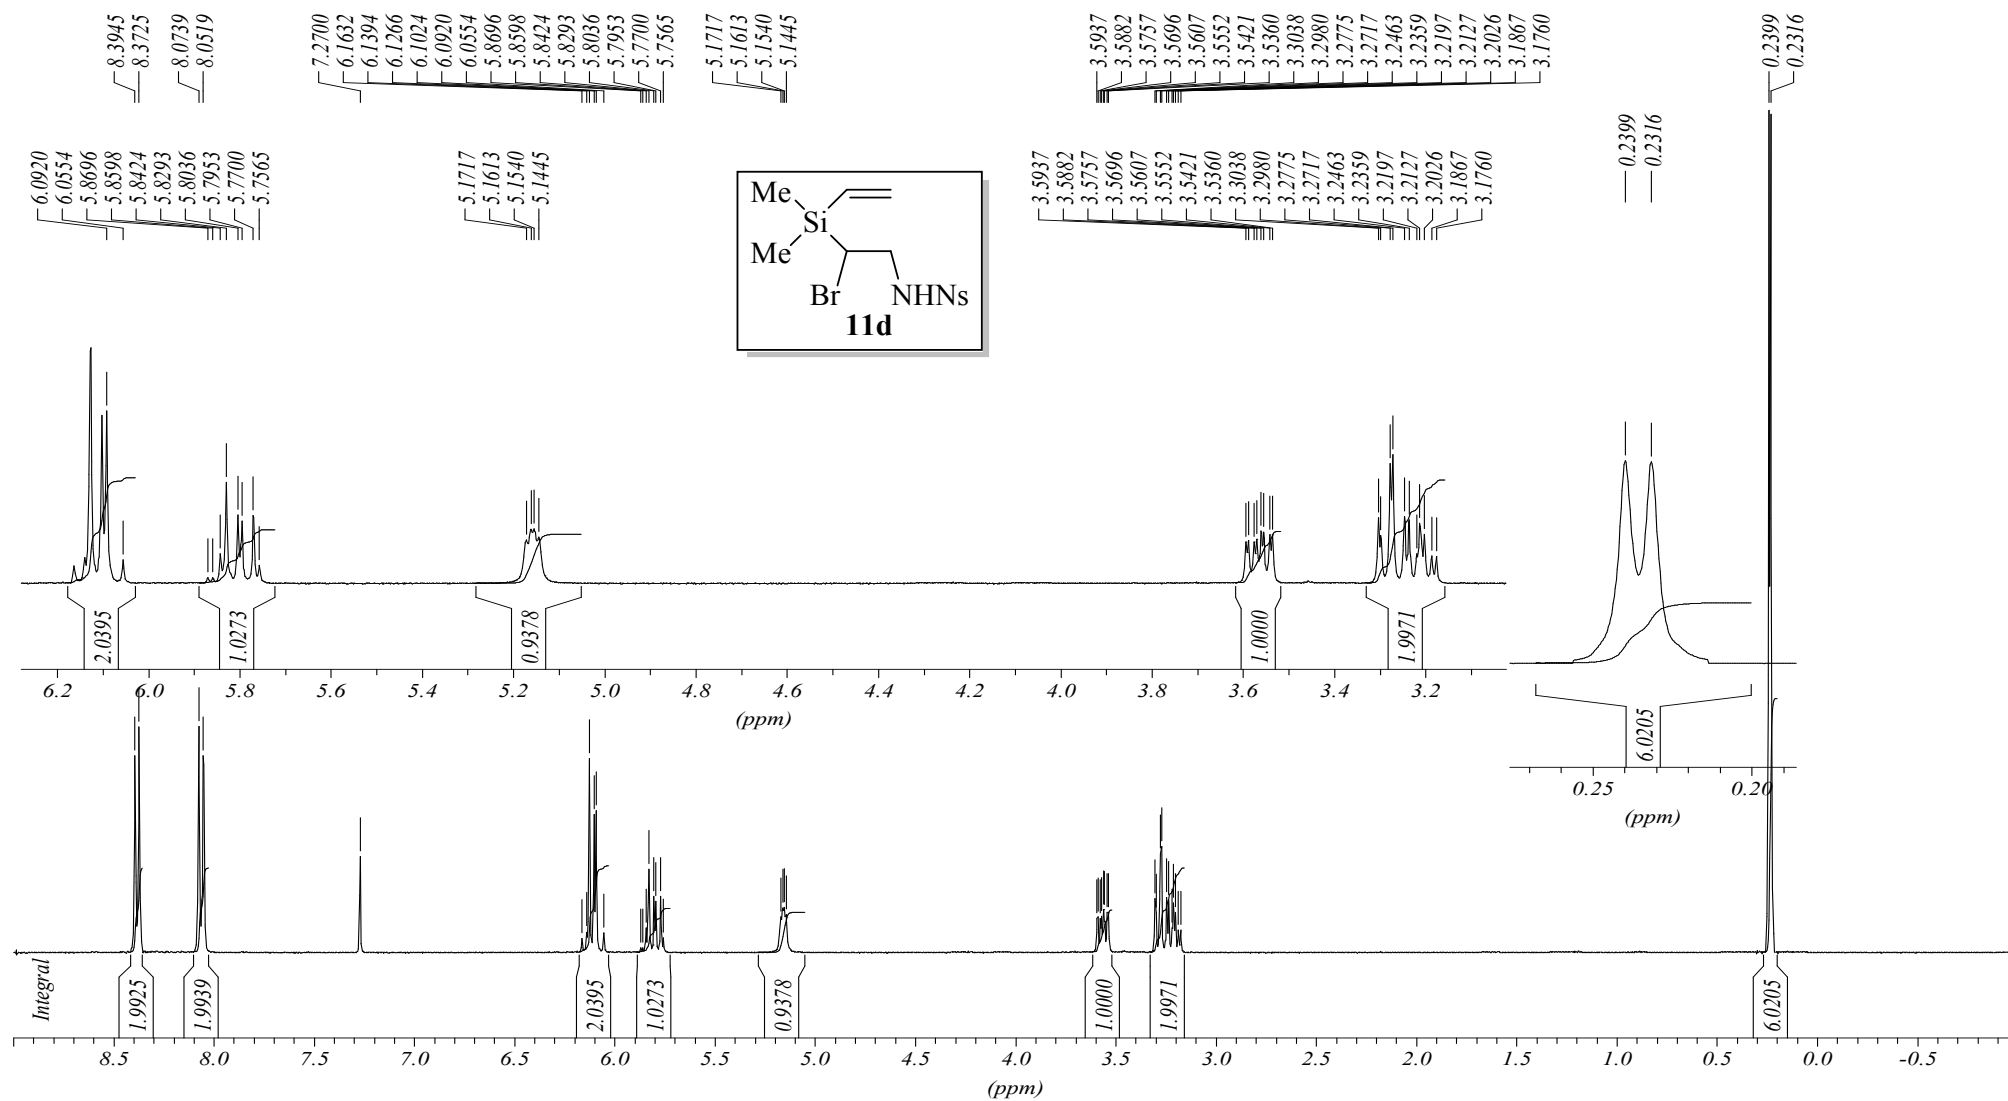

Figure S22.  $^{13}\text{C}$  NMR spectrum of compound **11d**

*N*-(2-Bromo-2-(dimethyl(vinyl)silyl)ethyl)-4-nitrobenzenesulfonamide, **11d** (R = Me).

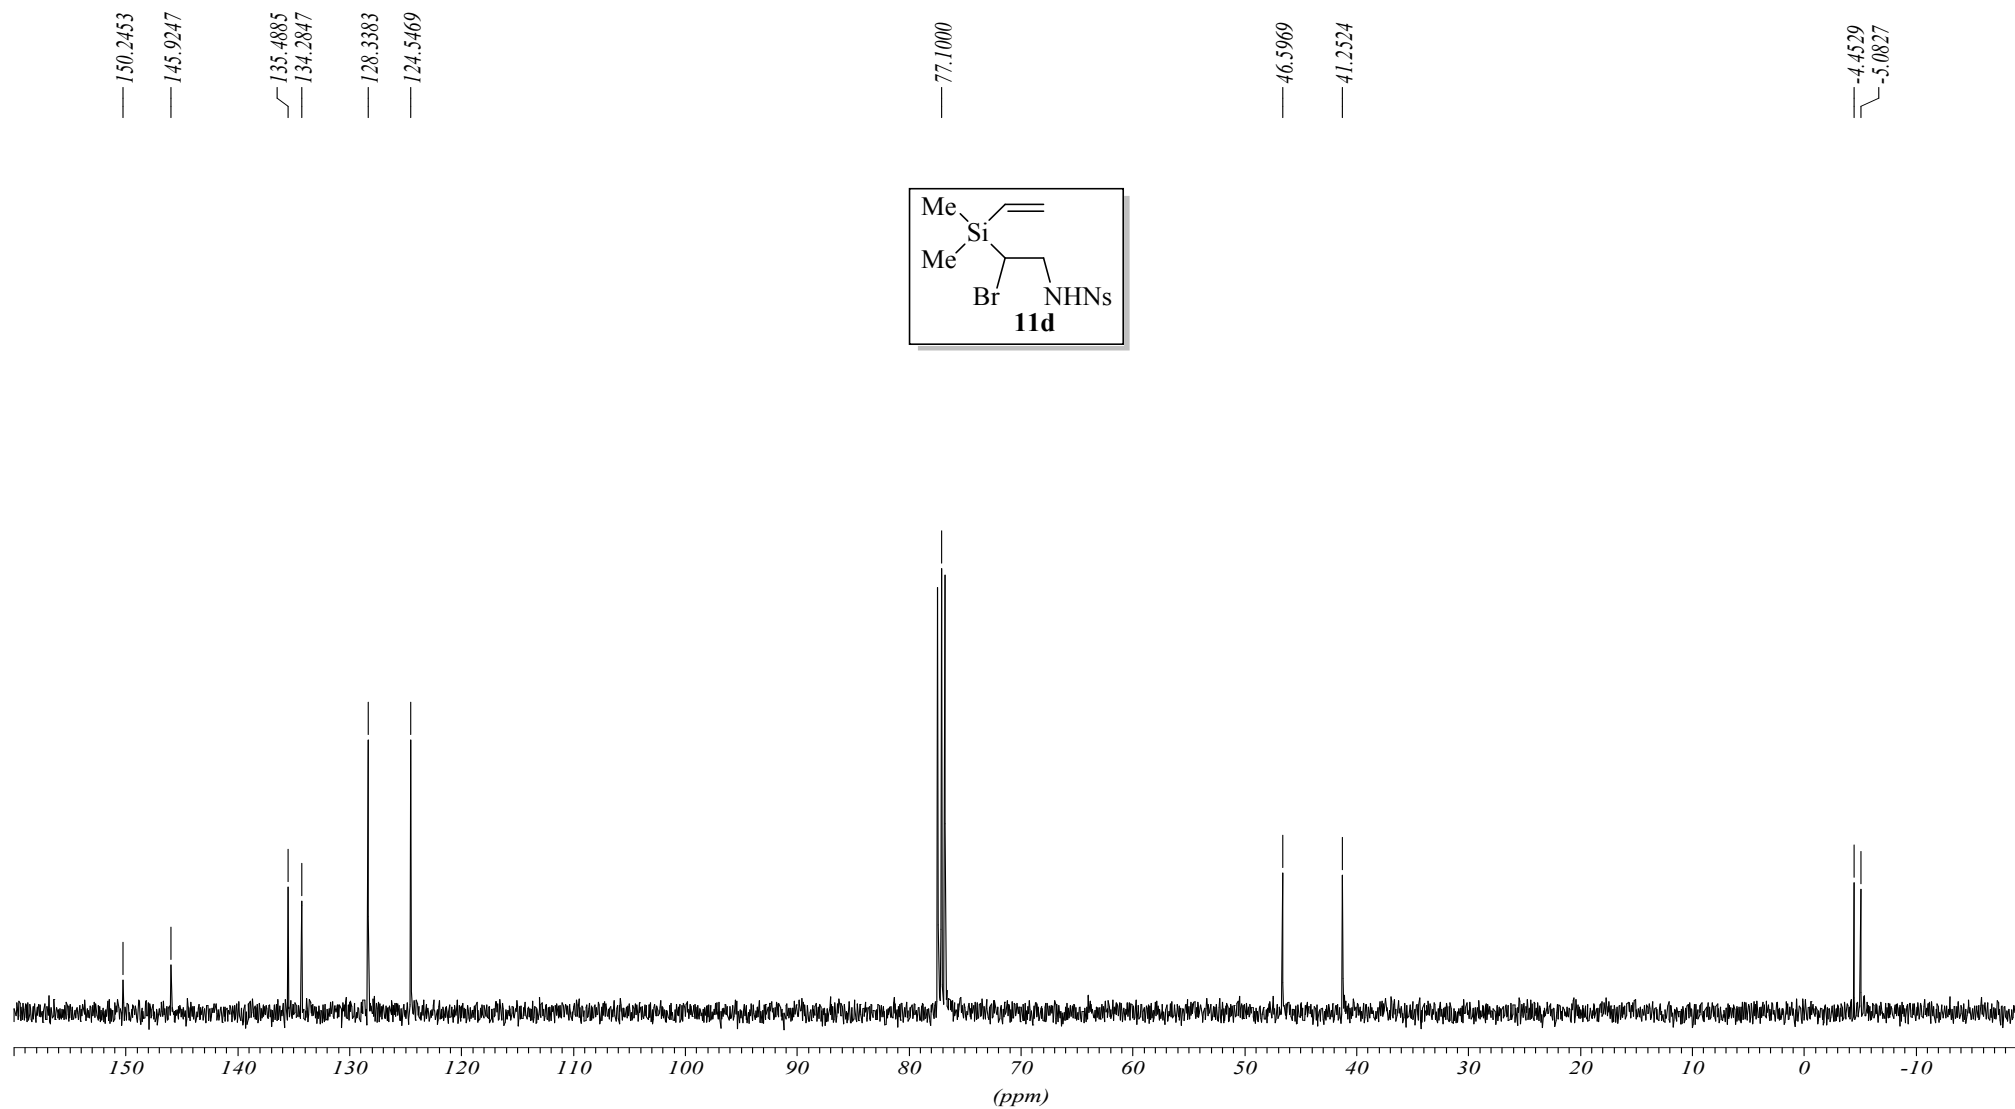

Figure S23. <sup>1</sup>H NMR spectrum of compound **12a**

*N*-(2-bromo-2-(diphenyl(vinyl)silyl)ethyl)-*N'*-((trifluoromethyl)sulfonyl)acetimidamide, **12a** (R = Ph).

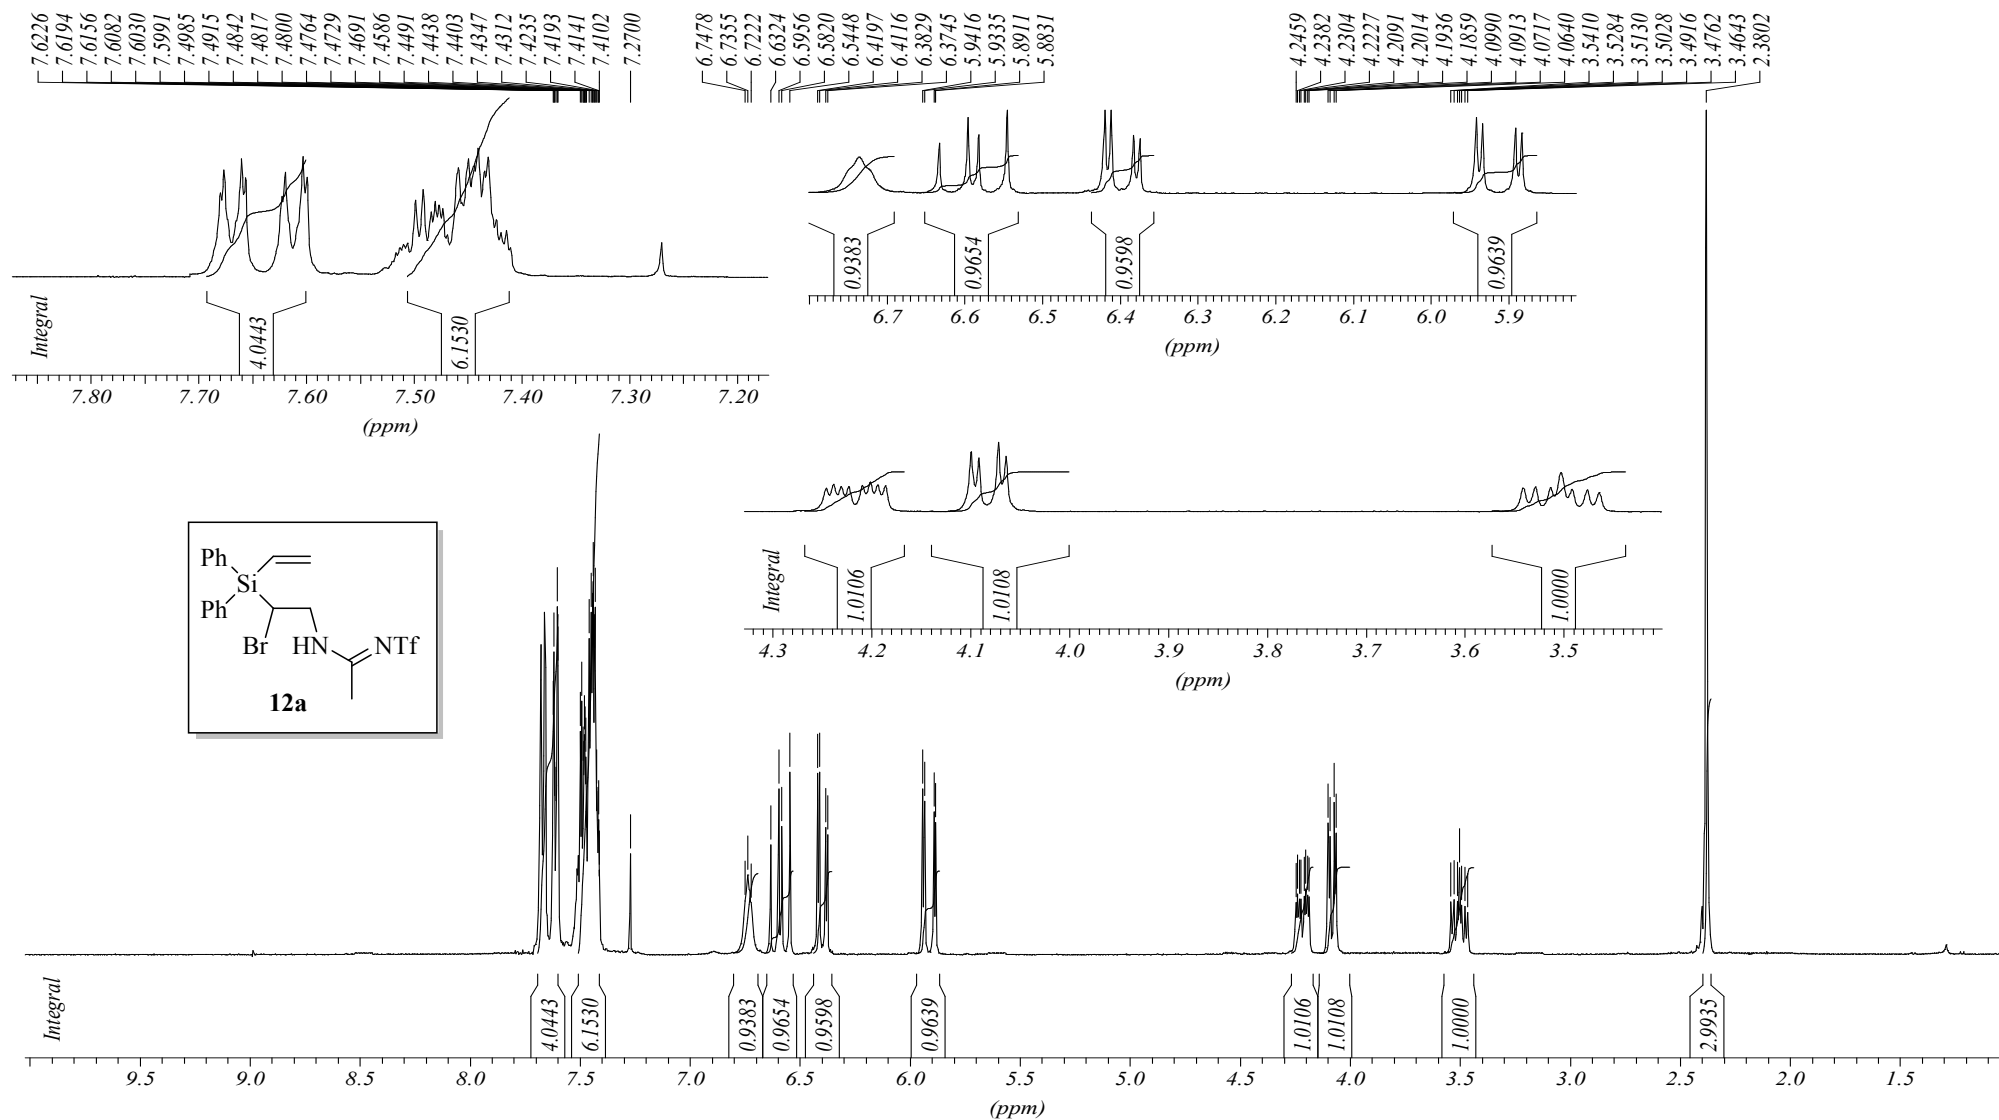



Figure S24.  $^{13}\text{C}$  NMR spectrum of compound **12a**

*N*-(2-bromo-2-(diphenyl(vinyl)silyl)ethyl)-*N'*-((trifluoromethyl)sulfonyl)acetimidamide, **12a**

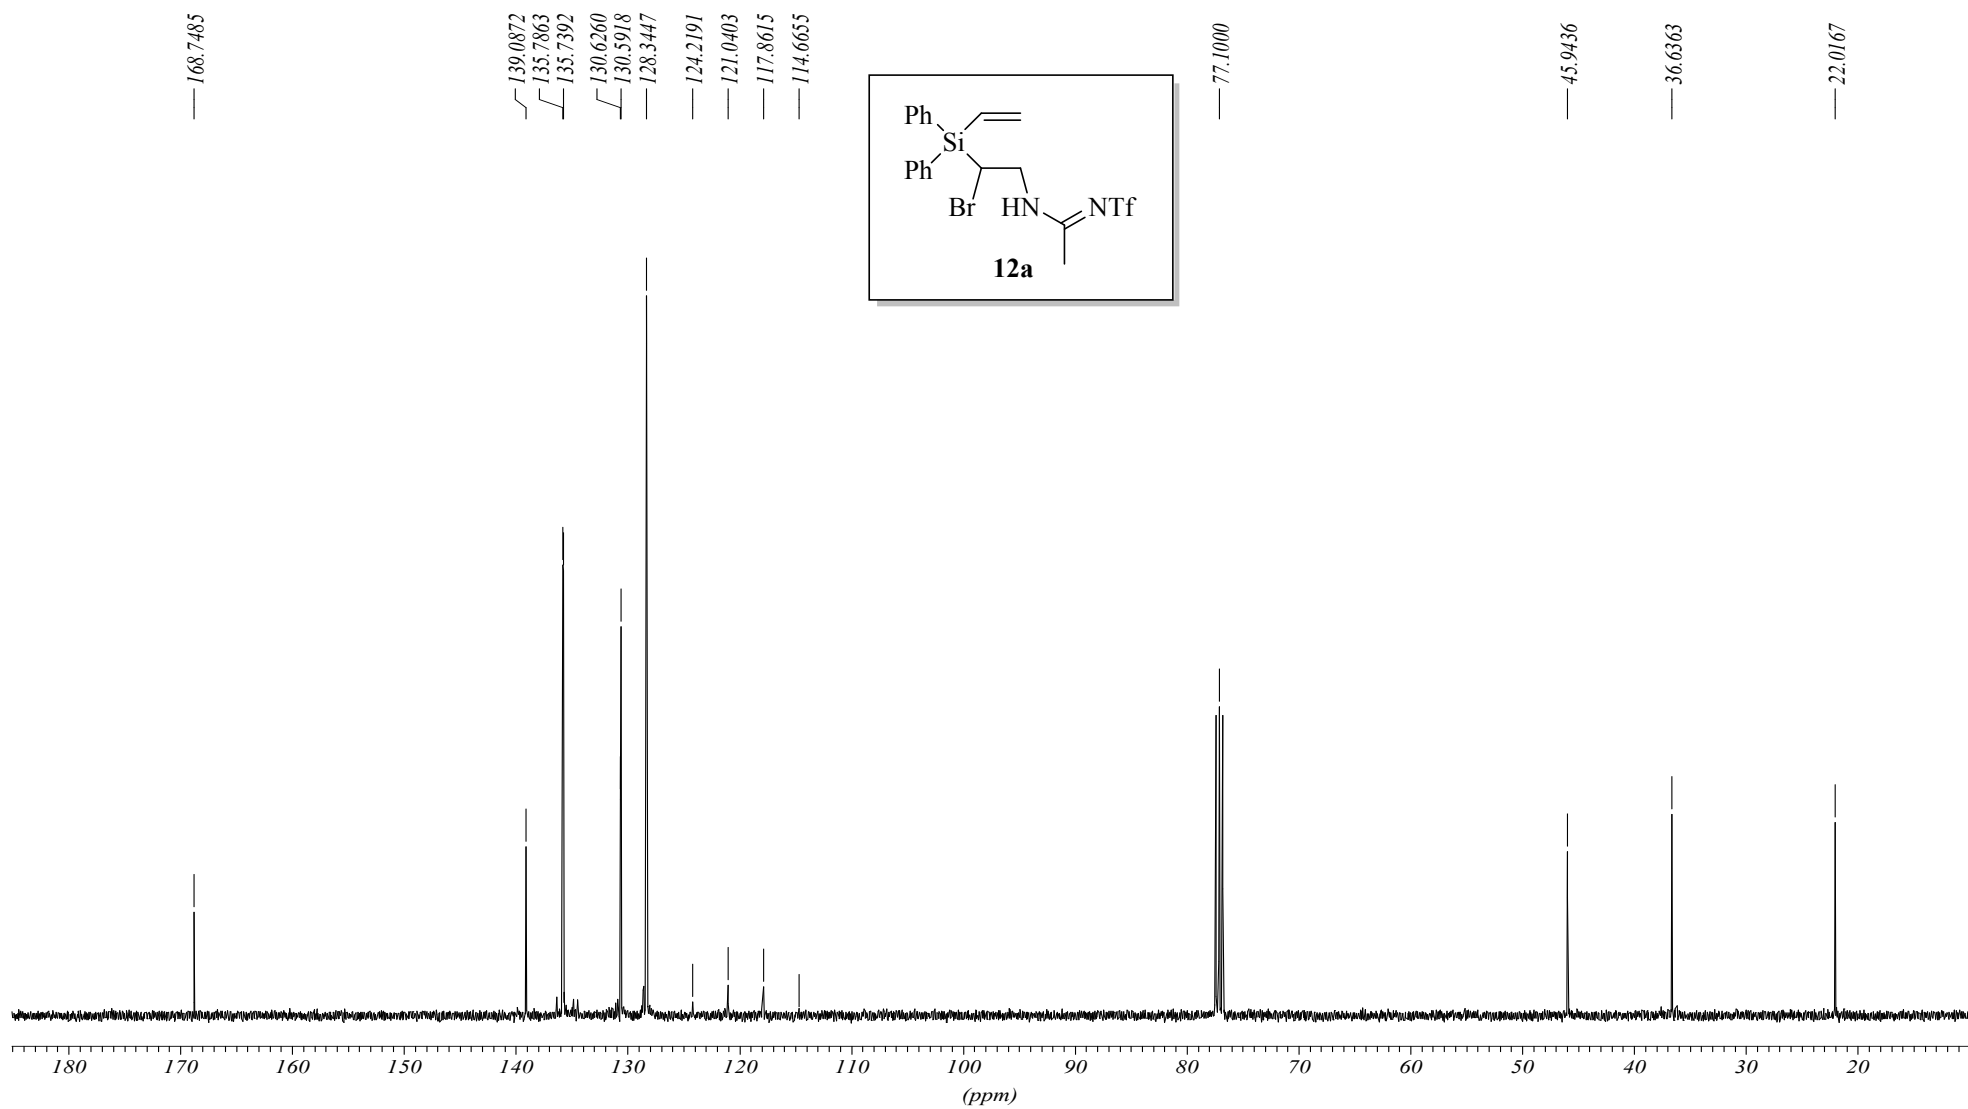

Figure S25. <sup>1</sup>H NMR spectrum of compound **12a**

*N*-(2-bromo-2-(dimethyl(vinyl)silyl)ethyl)-*N'*-((trifluoromethyl)sulfonyl)acetimidamide, **12a** (R = Me).

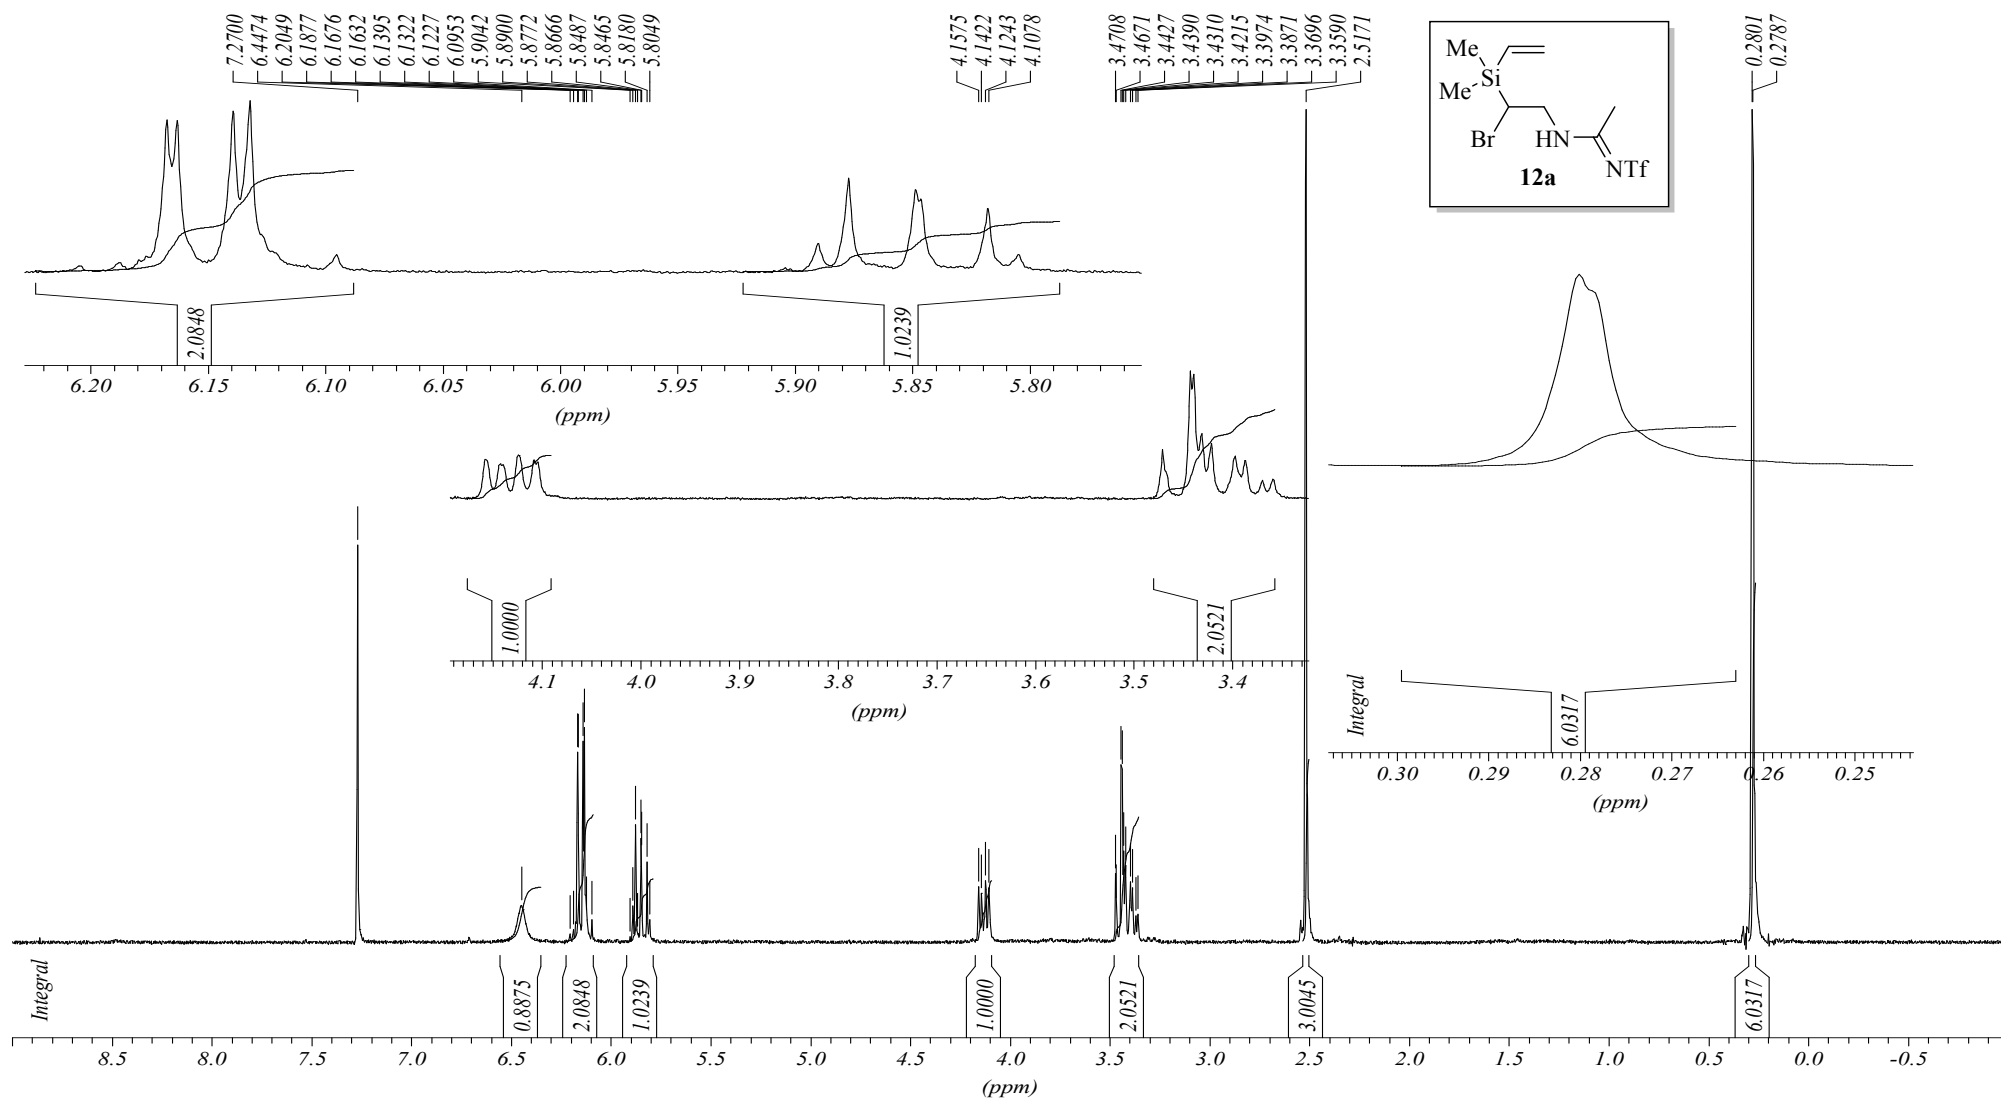

Figure S26.  $^{13}\text{C}$  NMR spectrum of compound **12a**

*N*-(2-bromo-2-(dimethyl(vinyl)silyl)ethyl)-*N'*-((trifluoromethyl)sulfonyl)acetimidamide, **12a** (R = Me).

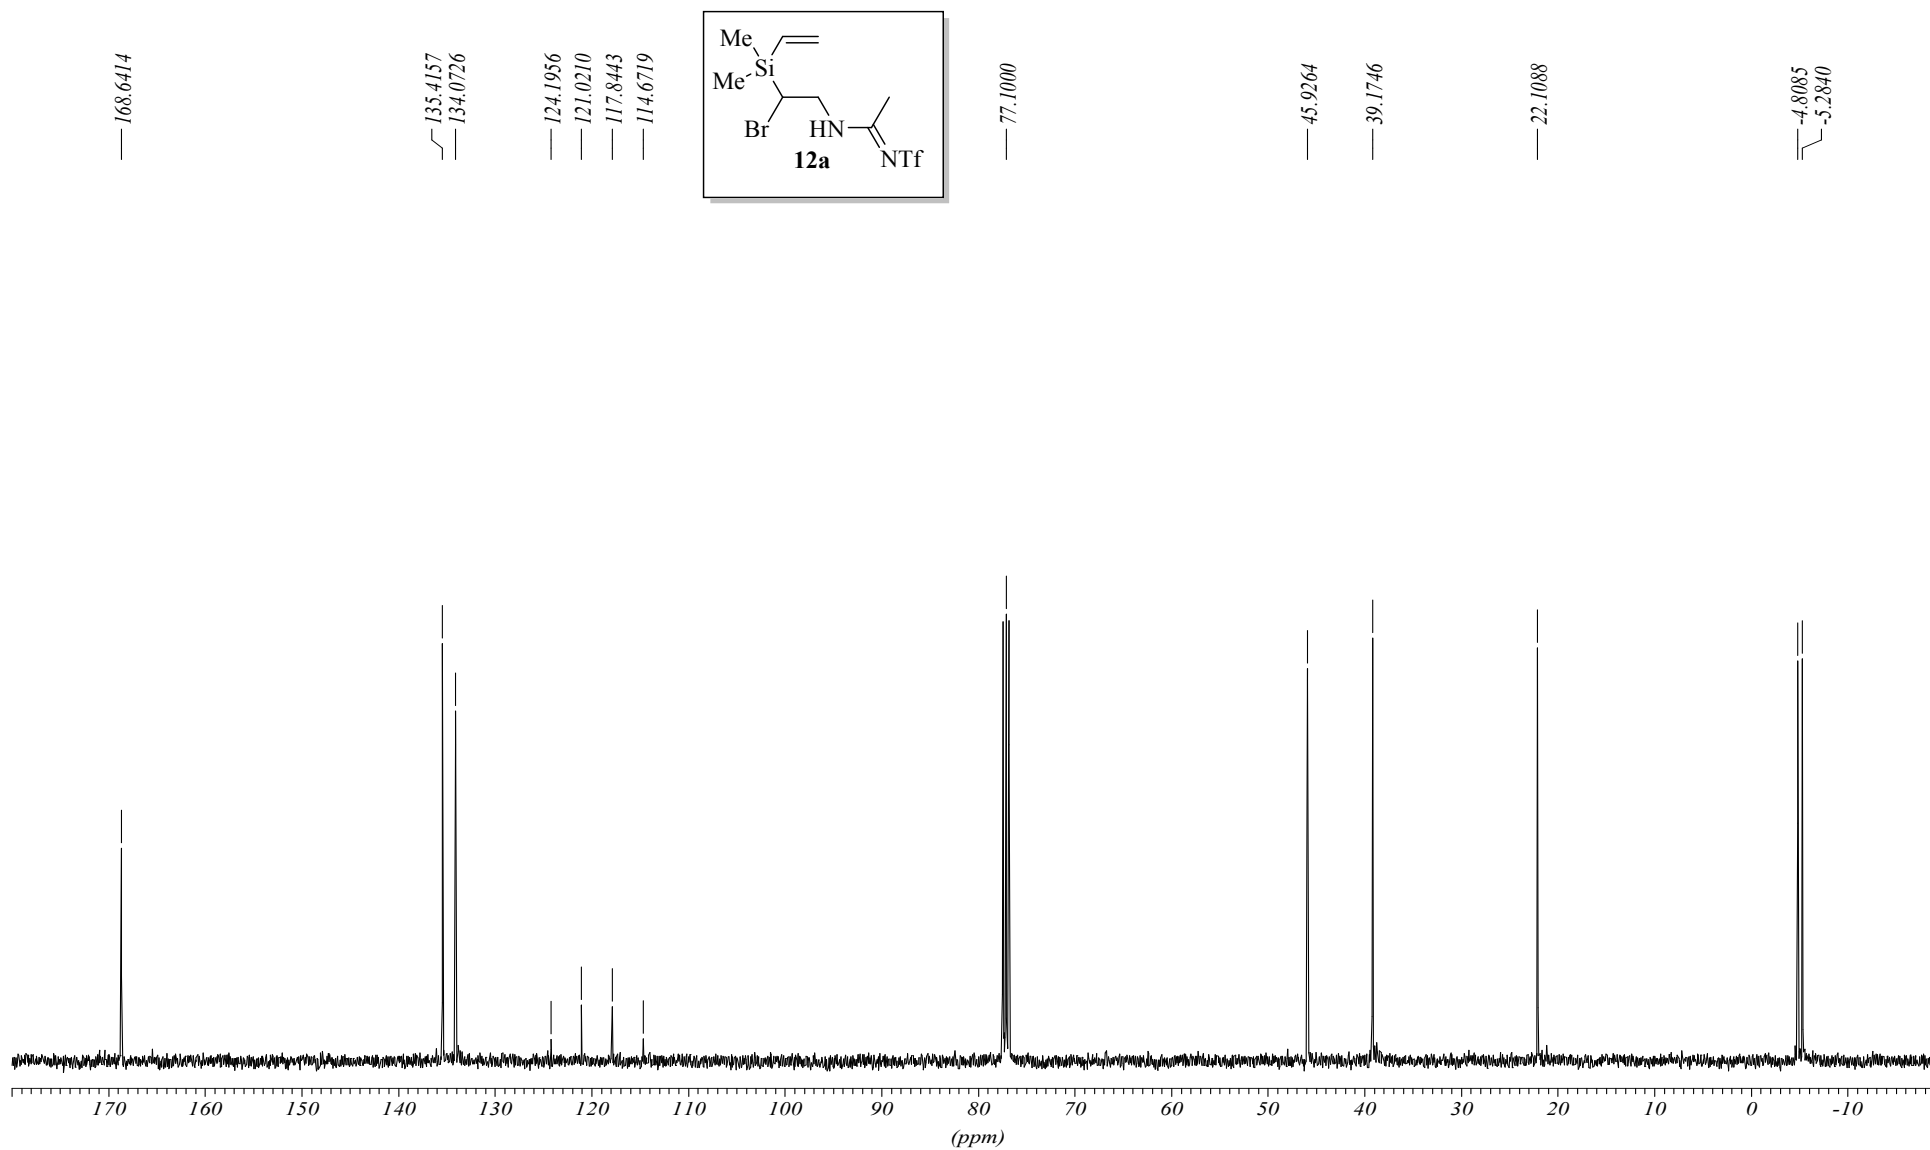

Figure S27. <sup>1</sup>H NMR spectrum of compound **13a**

*N*-(2-bromo-2-((1,2-dibromoethyl)diphenylsilyl)ethyl)-*N'*-((trifluoromethyl)sulfonyl)acetimidamide, **13a** (R = Ph).

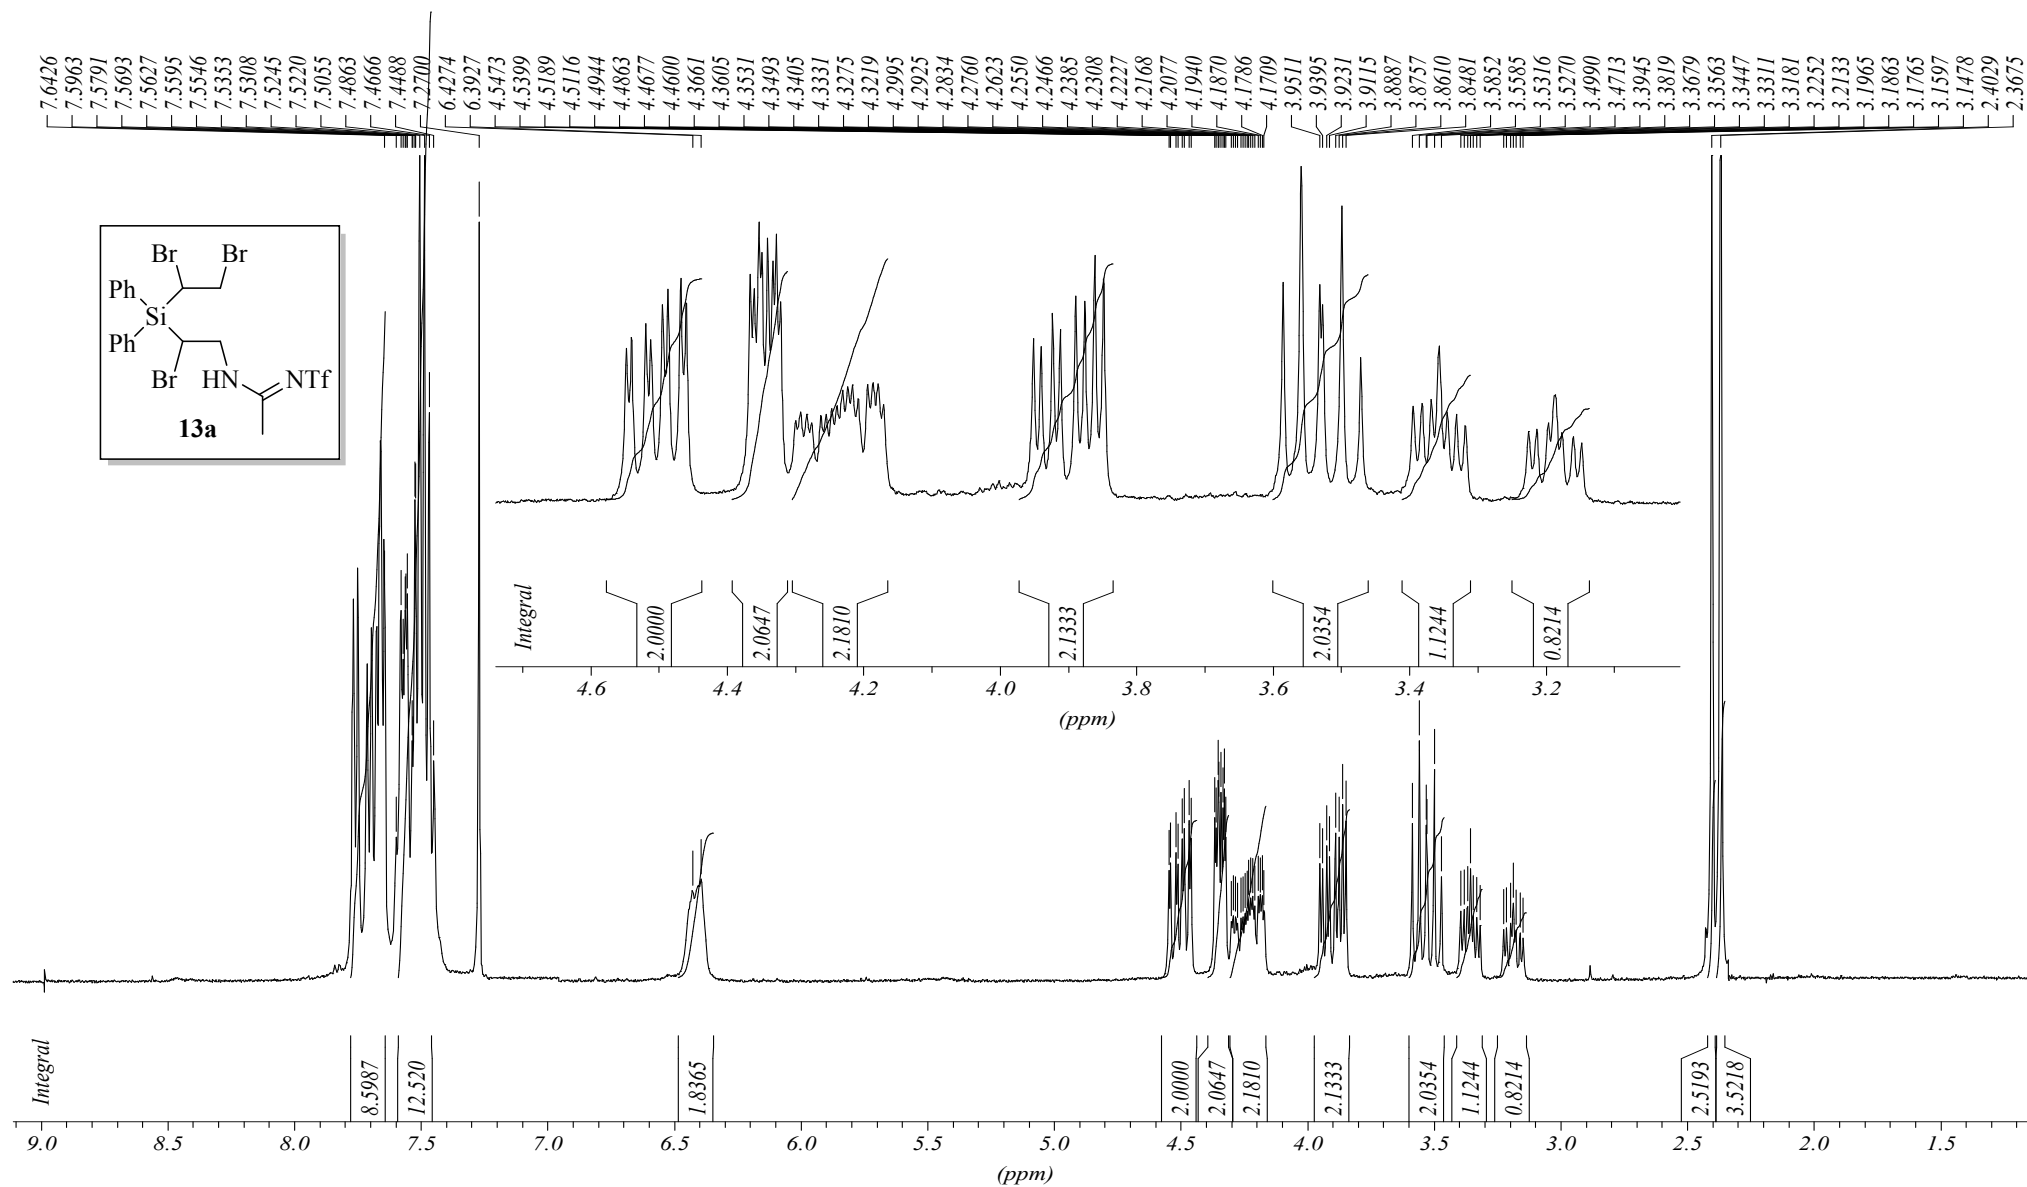

Figure S28.  $^{13}\text{C}$  (*J*-mod) NMR spectrum of compound **13a**

*N*-(2-bromo-2-((1,2-dibromoethyl)diphenylsilyl)ethyl)-*N'*-((trifluoromethyl)sulfonyl)acetimidamide, **13a** (R = Ph).

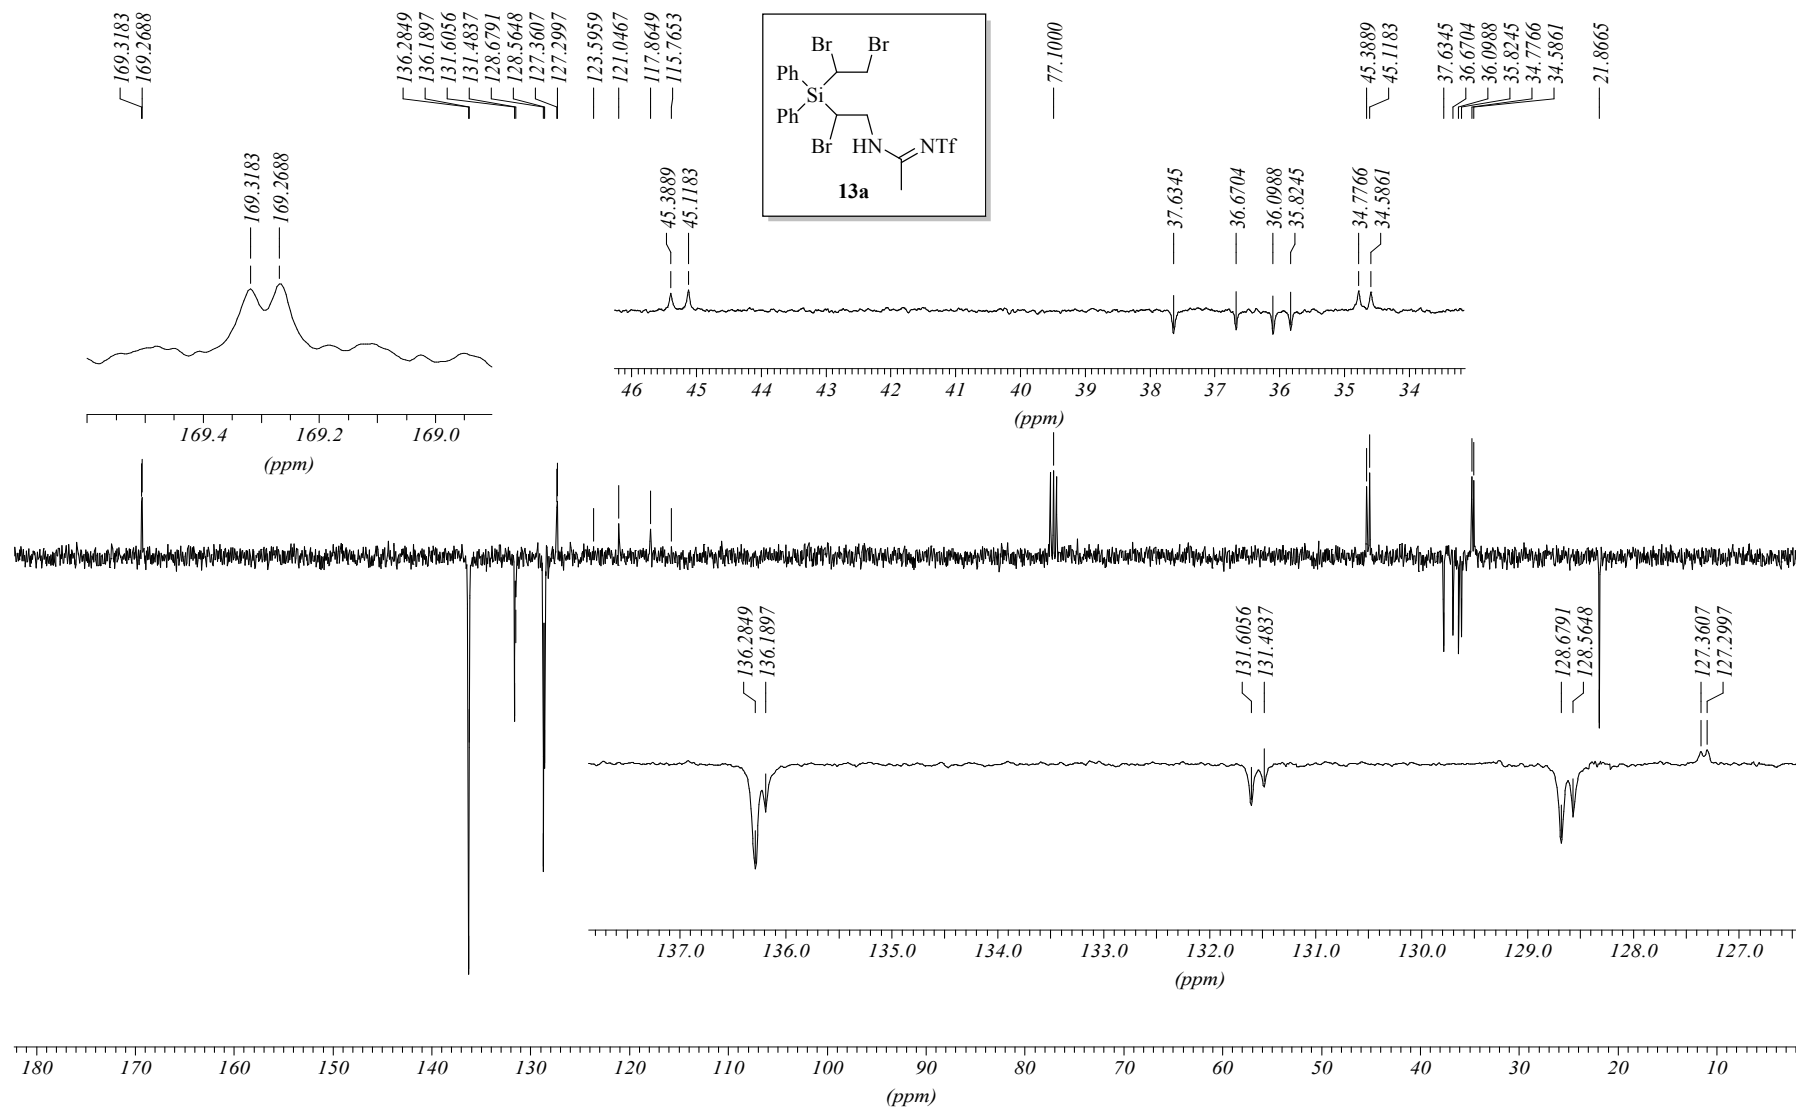

Figure S29. <sup>1</sup>H NMR spectrum of compound **13a**

*N*-(2-bromo-2-((1,2-dibromoethyl)dimethylsilyl)ethyl)-*N'*-((trifluoromethyl)sulfonyl)acetimidamide, **13a** (R = Me).

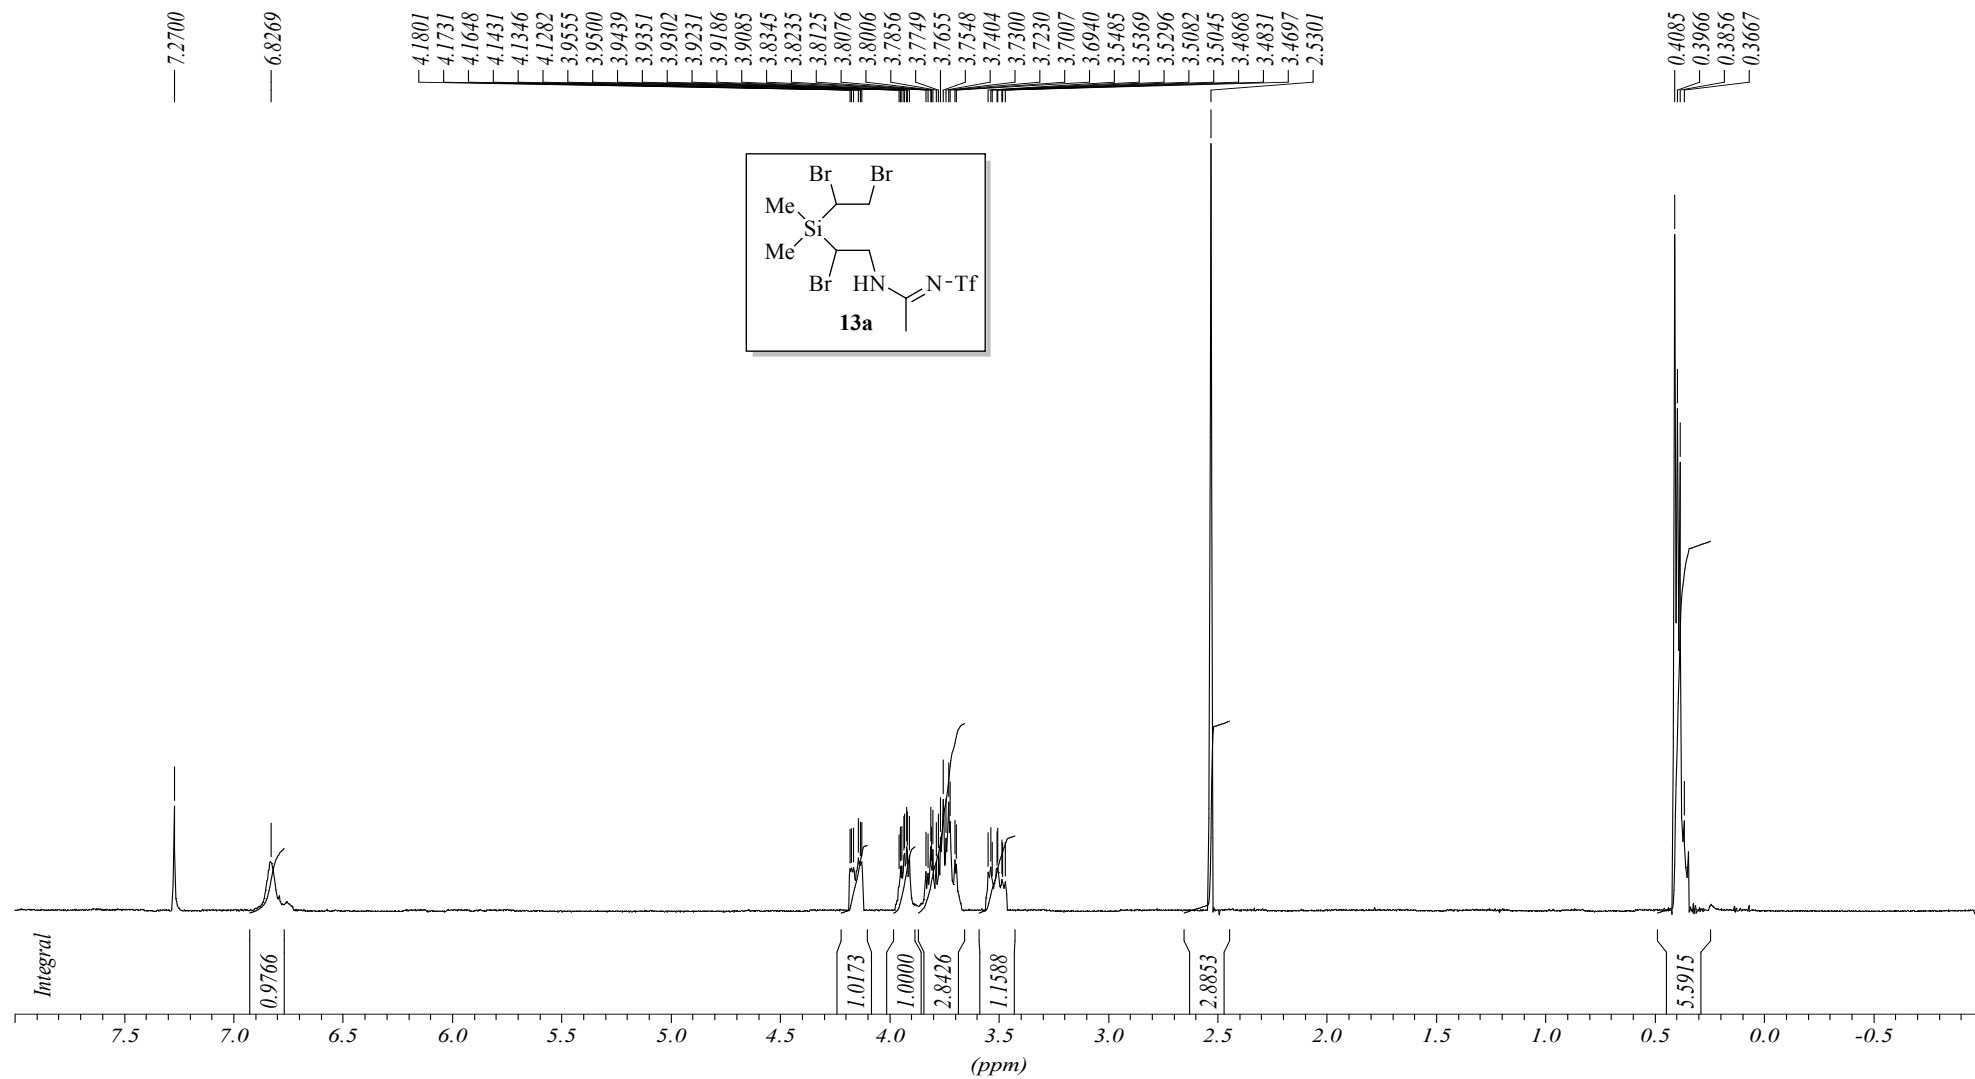

Figure S30.  $^{13}\text{C}$  NMR spectrum of compound **13a**

*N*-(2-bromo-2-((1,2-dibromoethyl)dimethylsilyl)ethyl)-*N'*-((trifluoromethyl)sulfonyl)acetimidamide, **13a** (R = Me).

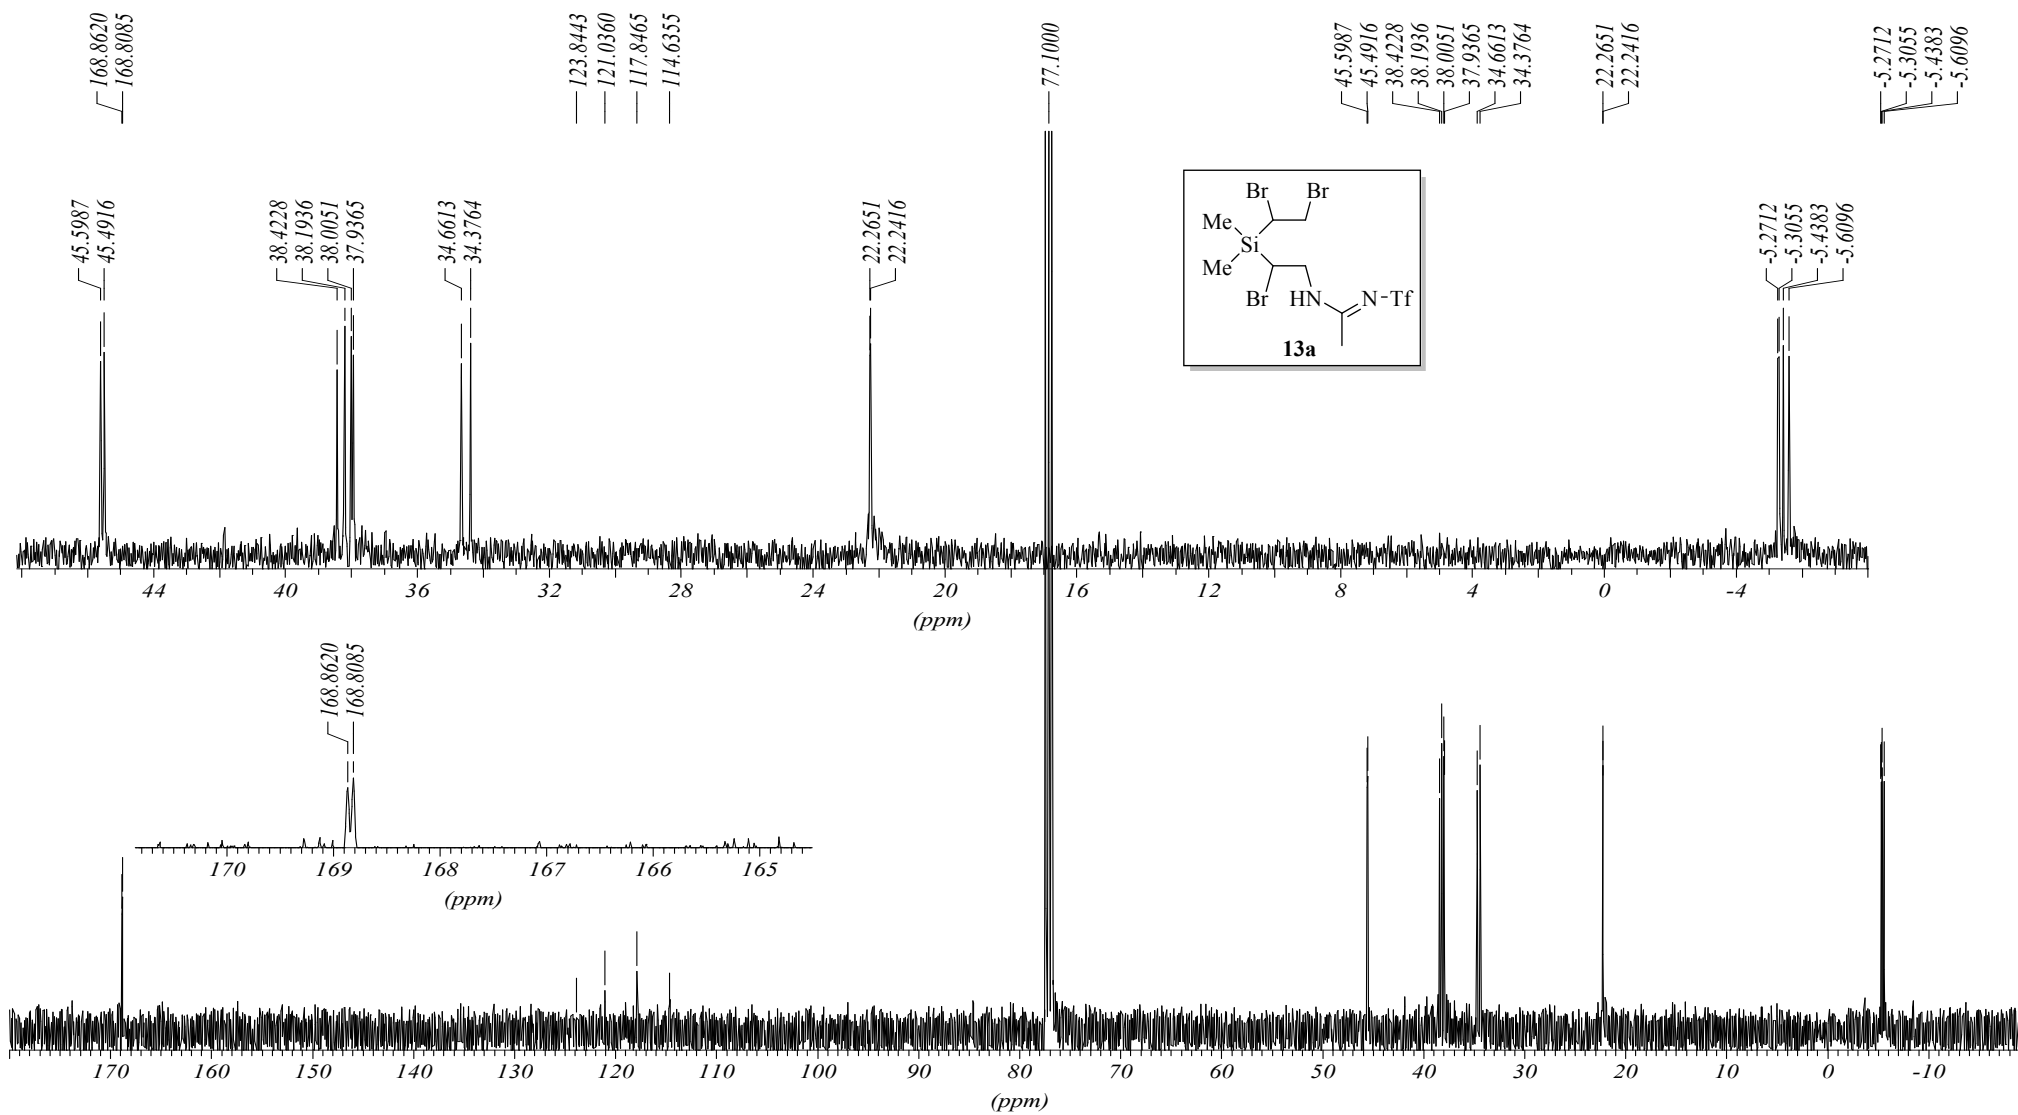

Figure S31. <sup>1</sup>H NMR spectrum of compound **13d**

*N*-(2-bromo-2-((1,2-dibromoethyl)diphenylsilyl)ethyl)-*N'*-(4-nitrophenylsulfonyl)-acetamidine, **13d** (R = Ph).

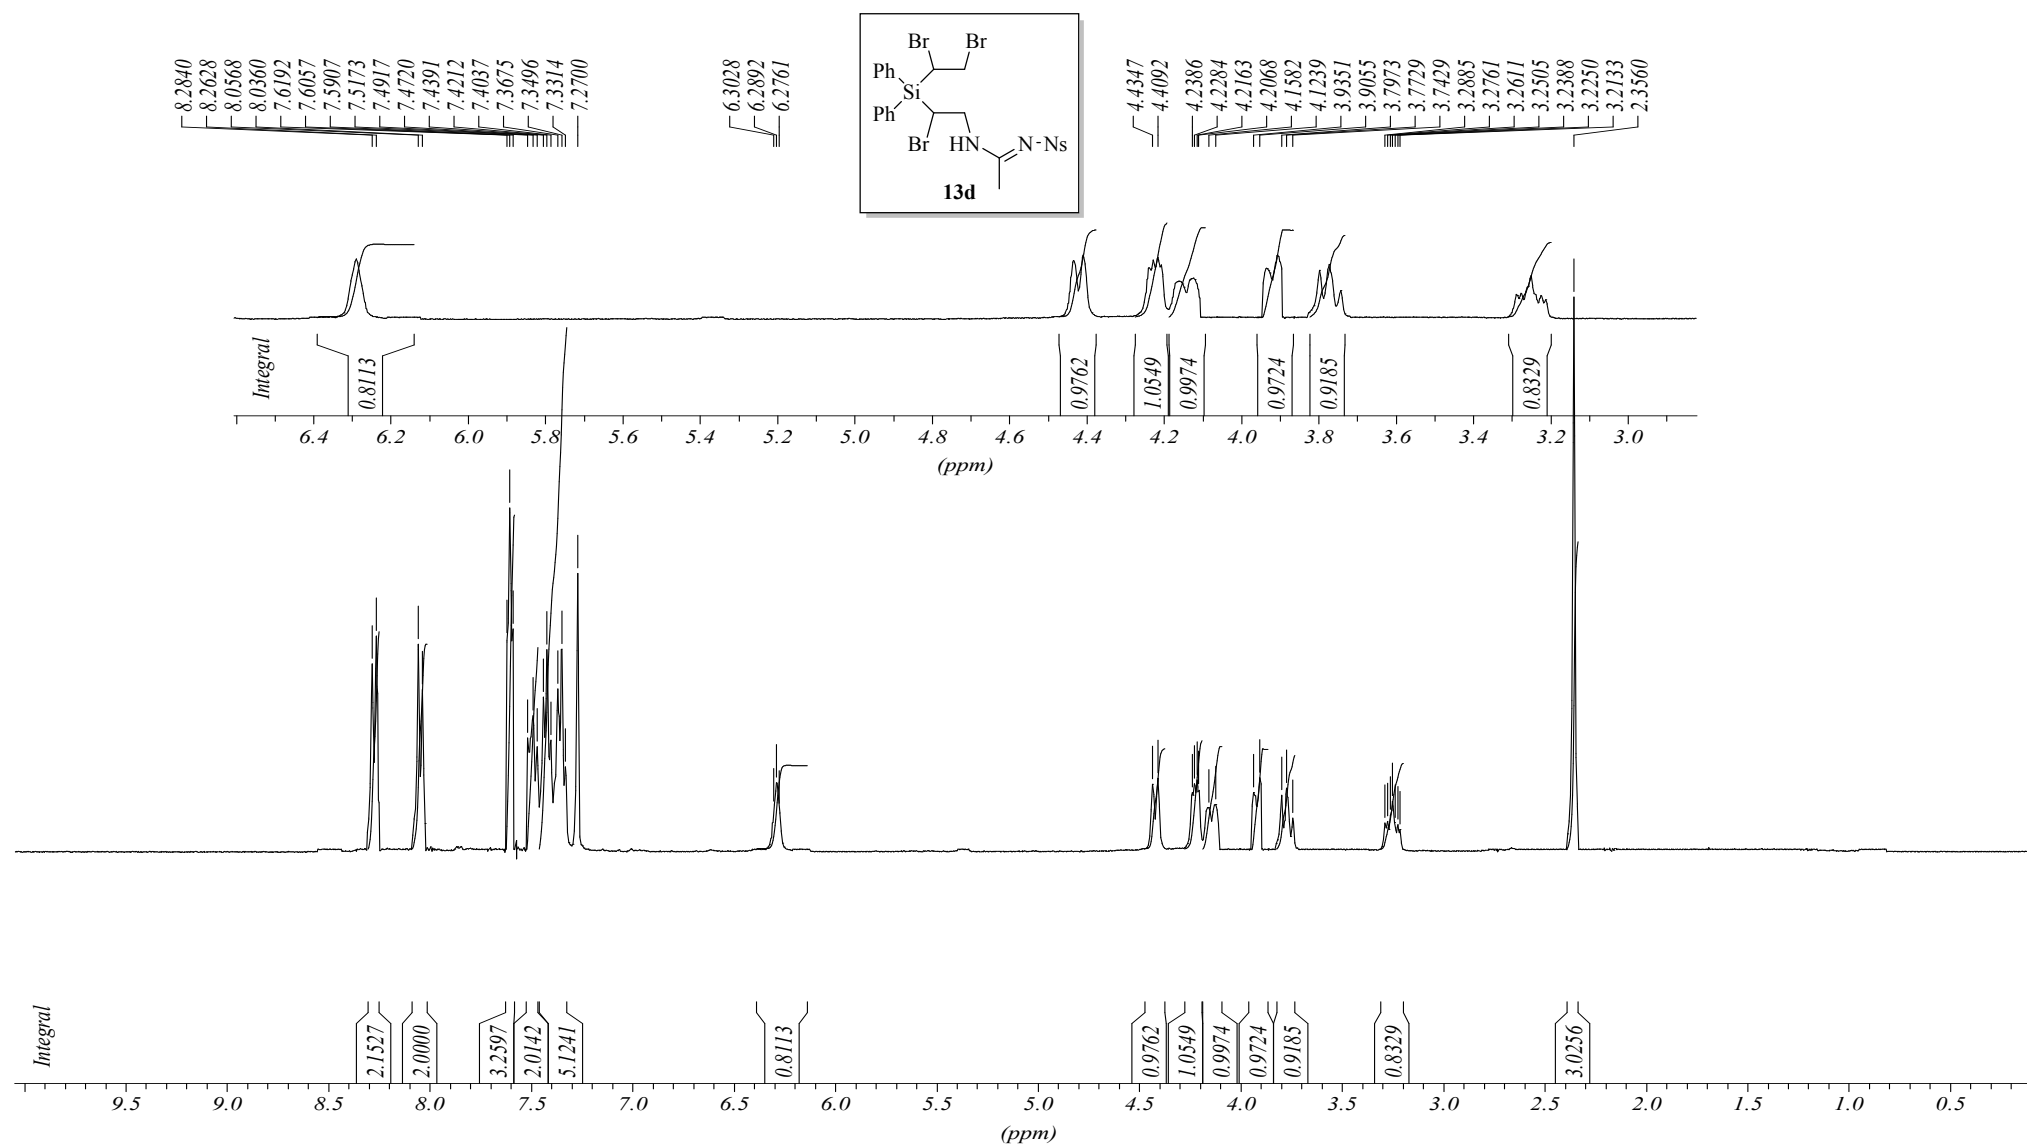



Figure S32.  $^{13}\text{C}$  NMR spectrum of compound **13d**

*N*-(2-bromo-2-((1,2-dibromoethyl)diphenylsilyl)ethyl)-*N'*-(4-nitrophenylsulfonyl)-acetamidine, **13d** (R = Ph).

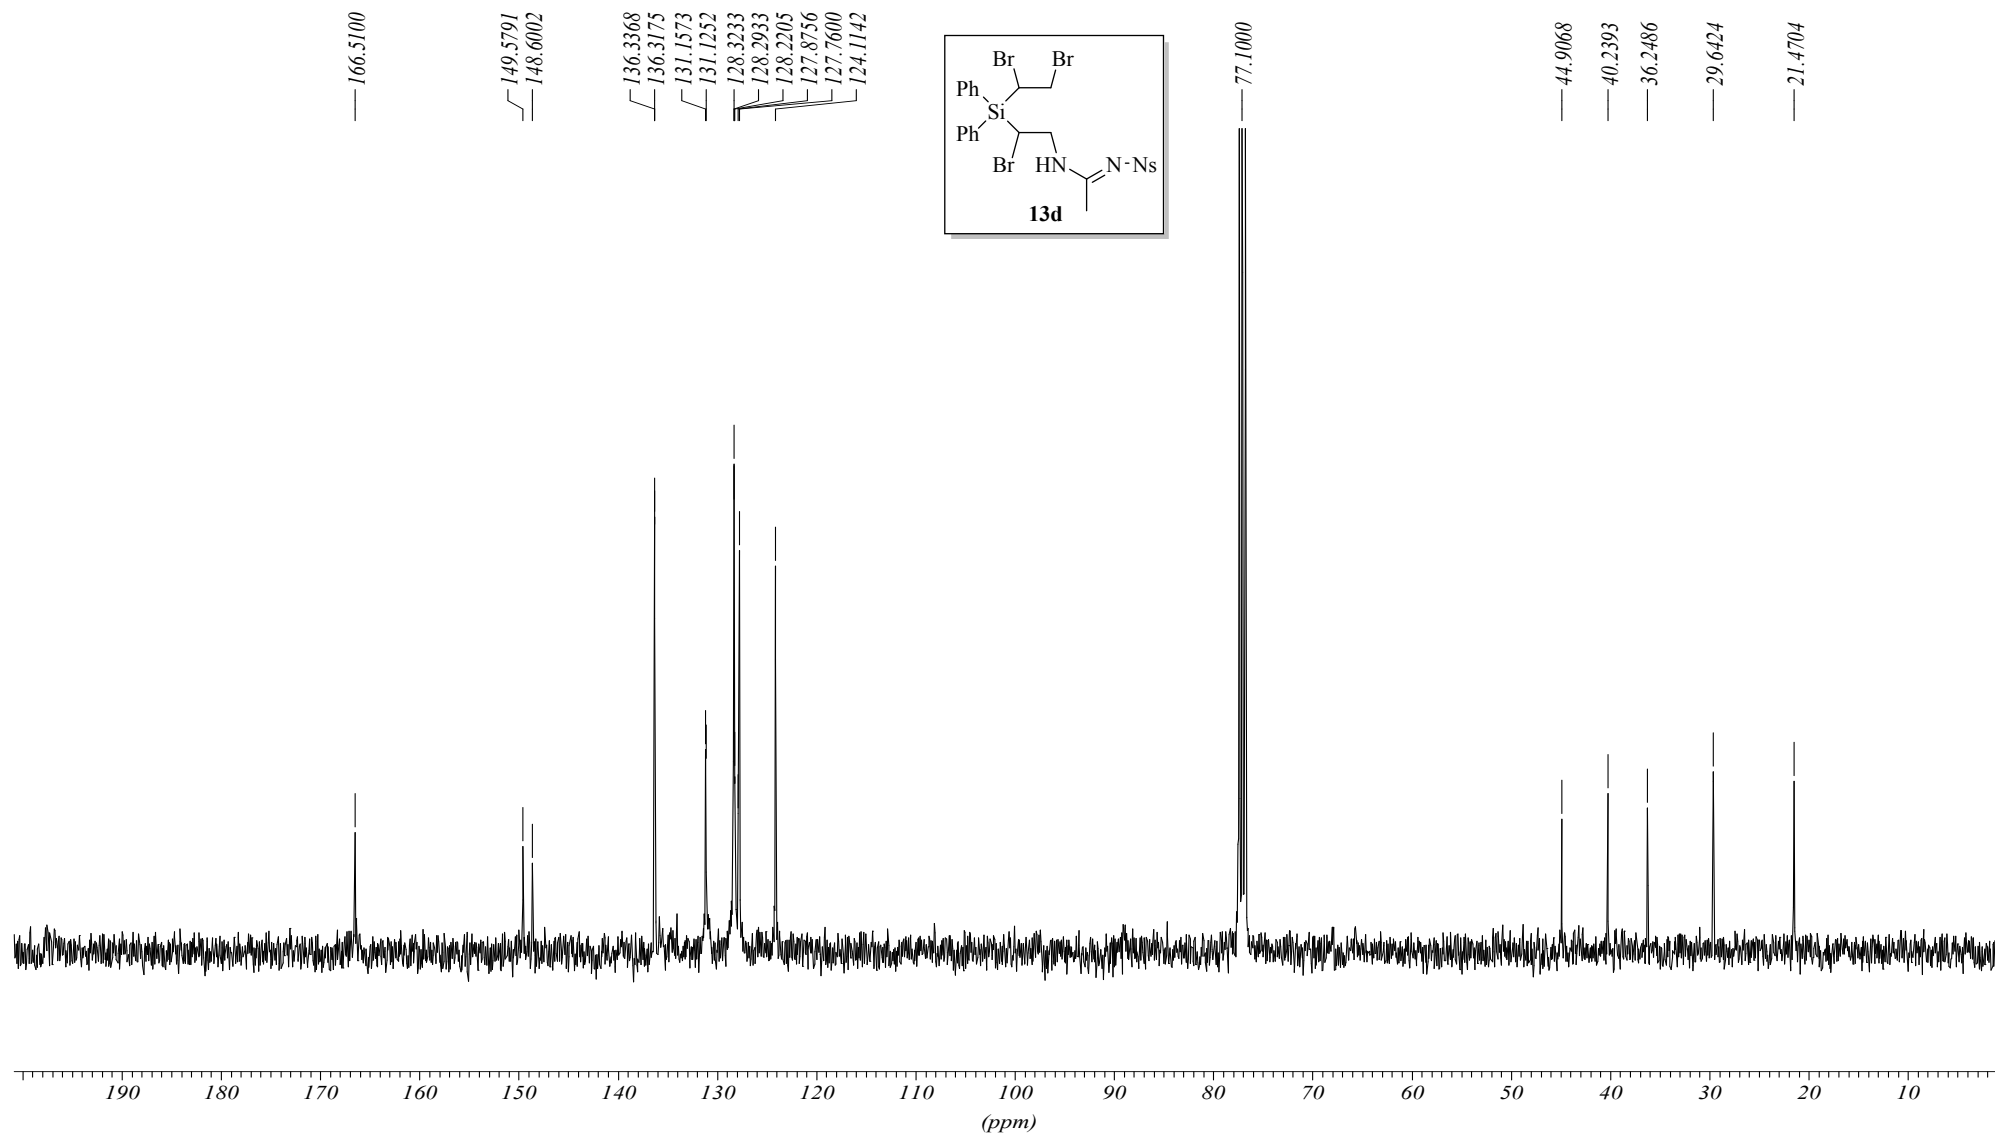

Figure S33. <sup>1</sup>H NMR spectrum of compound **14**

*N*-(2-bromo-2-(diphenyl(vinyl)silyl)ethyl)acetamide, **14**.

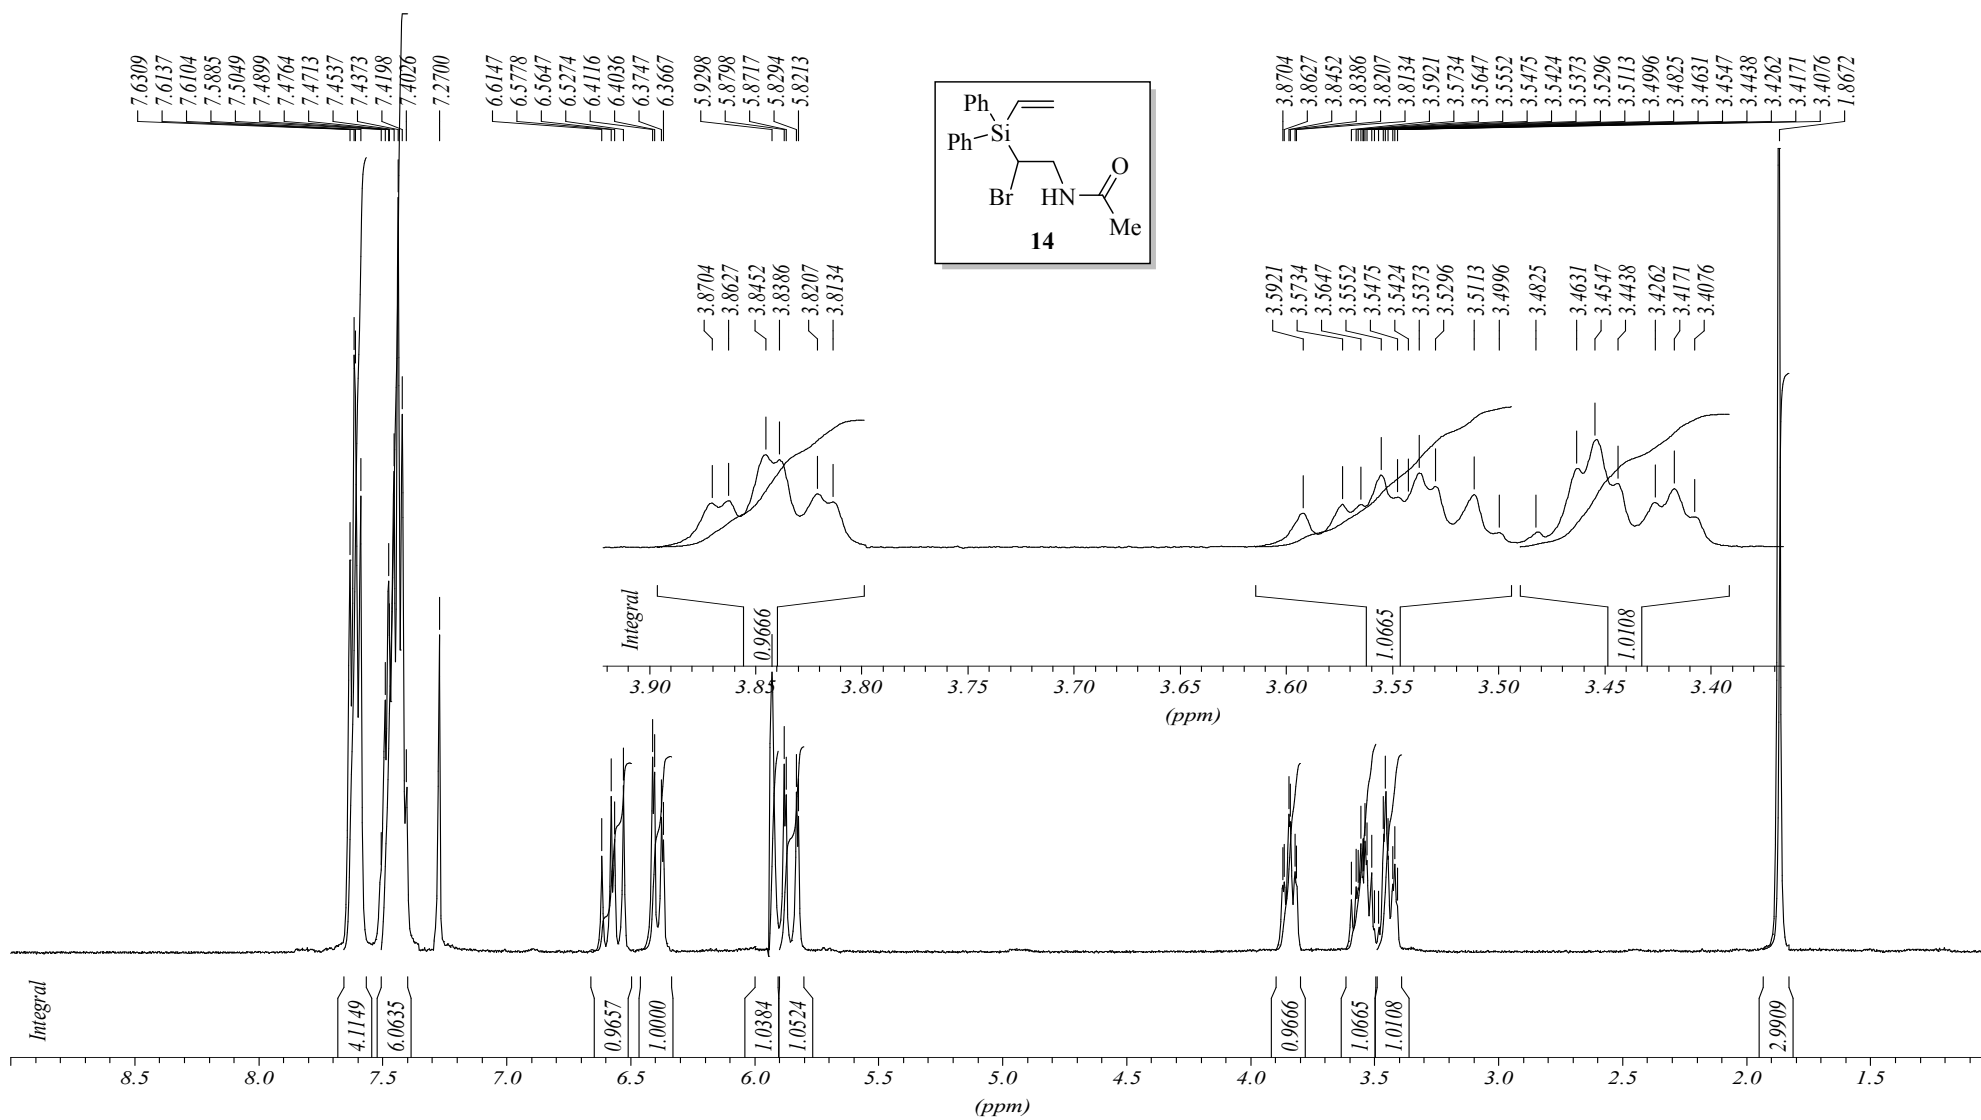

Figure S34.  $^{13}\text{C}$  NMR spectrum of compound **14**

*N*-(2-bromo-2-(diphenyl(vinyl)silyl)ethyl)acetamide, **14**.

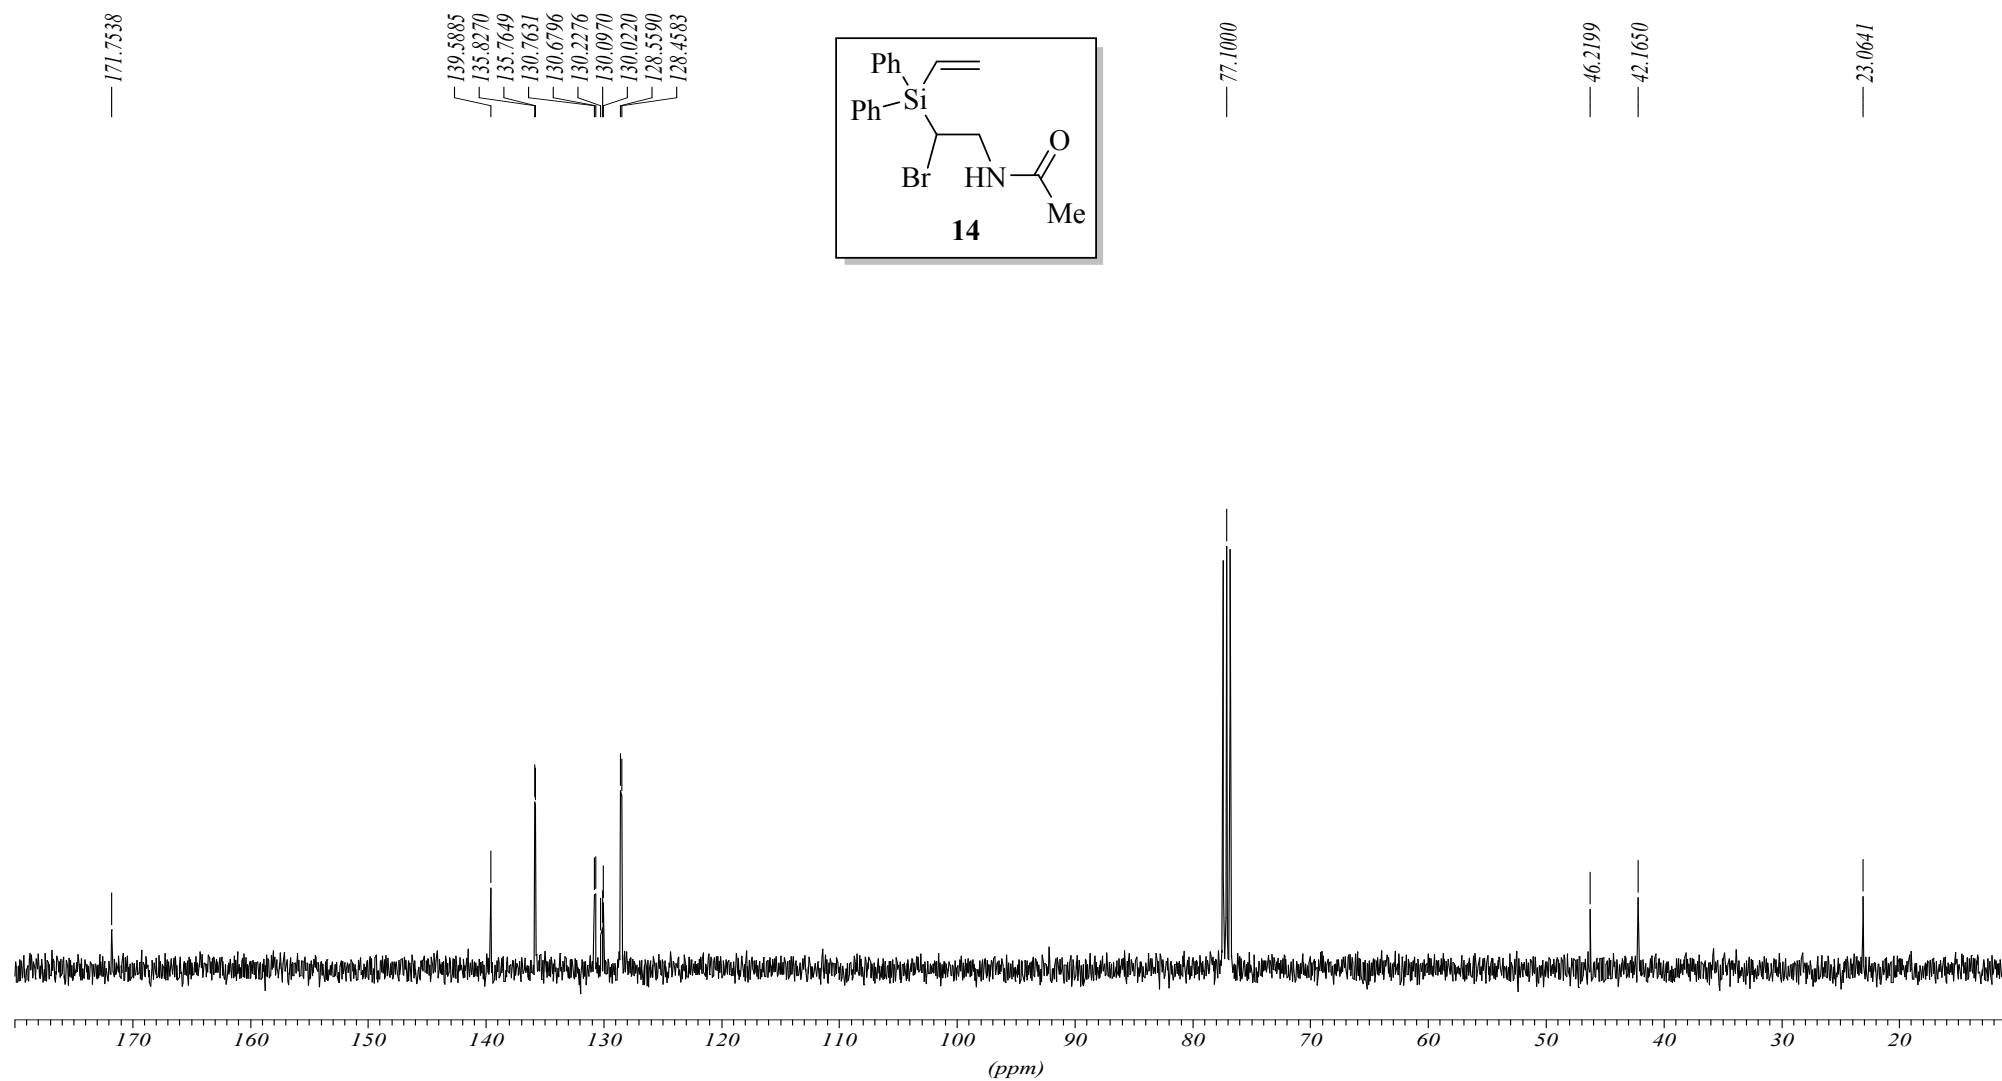

Figure S35. <sup>1</sup>H NMR spectrum of compound **15**

(1-Bromo-2-(4-bromobutoxy)ethyl)diphenyl(vinyl)silane, **15** (R = Ph).

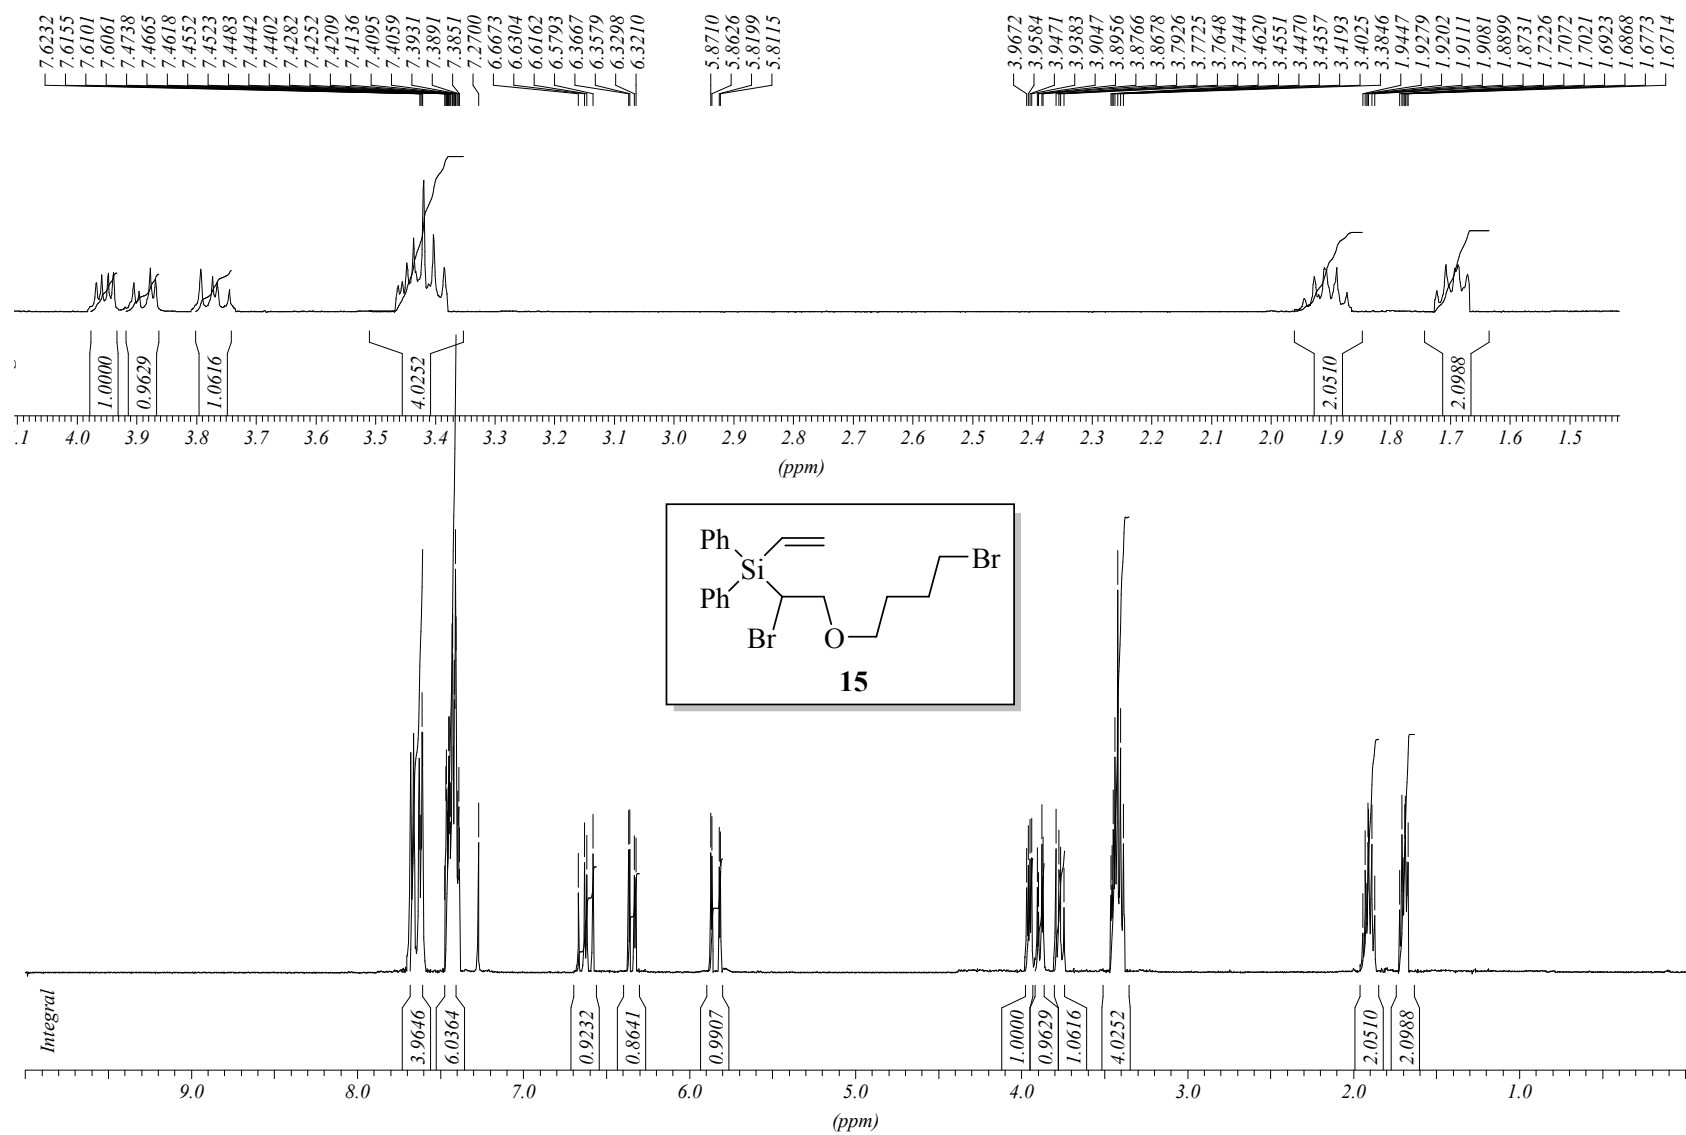

Figure S36.  $^{13}\text{C}$  ( $J$ -mod) NMR spectrum of compound **15**

(1-Bromo-2-(4-bromobutoxy)ethyl)diphenyl(vinyl)silane, **15** (R = Ph).

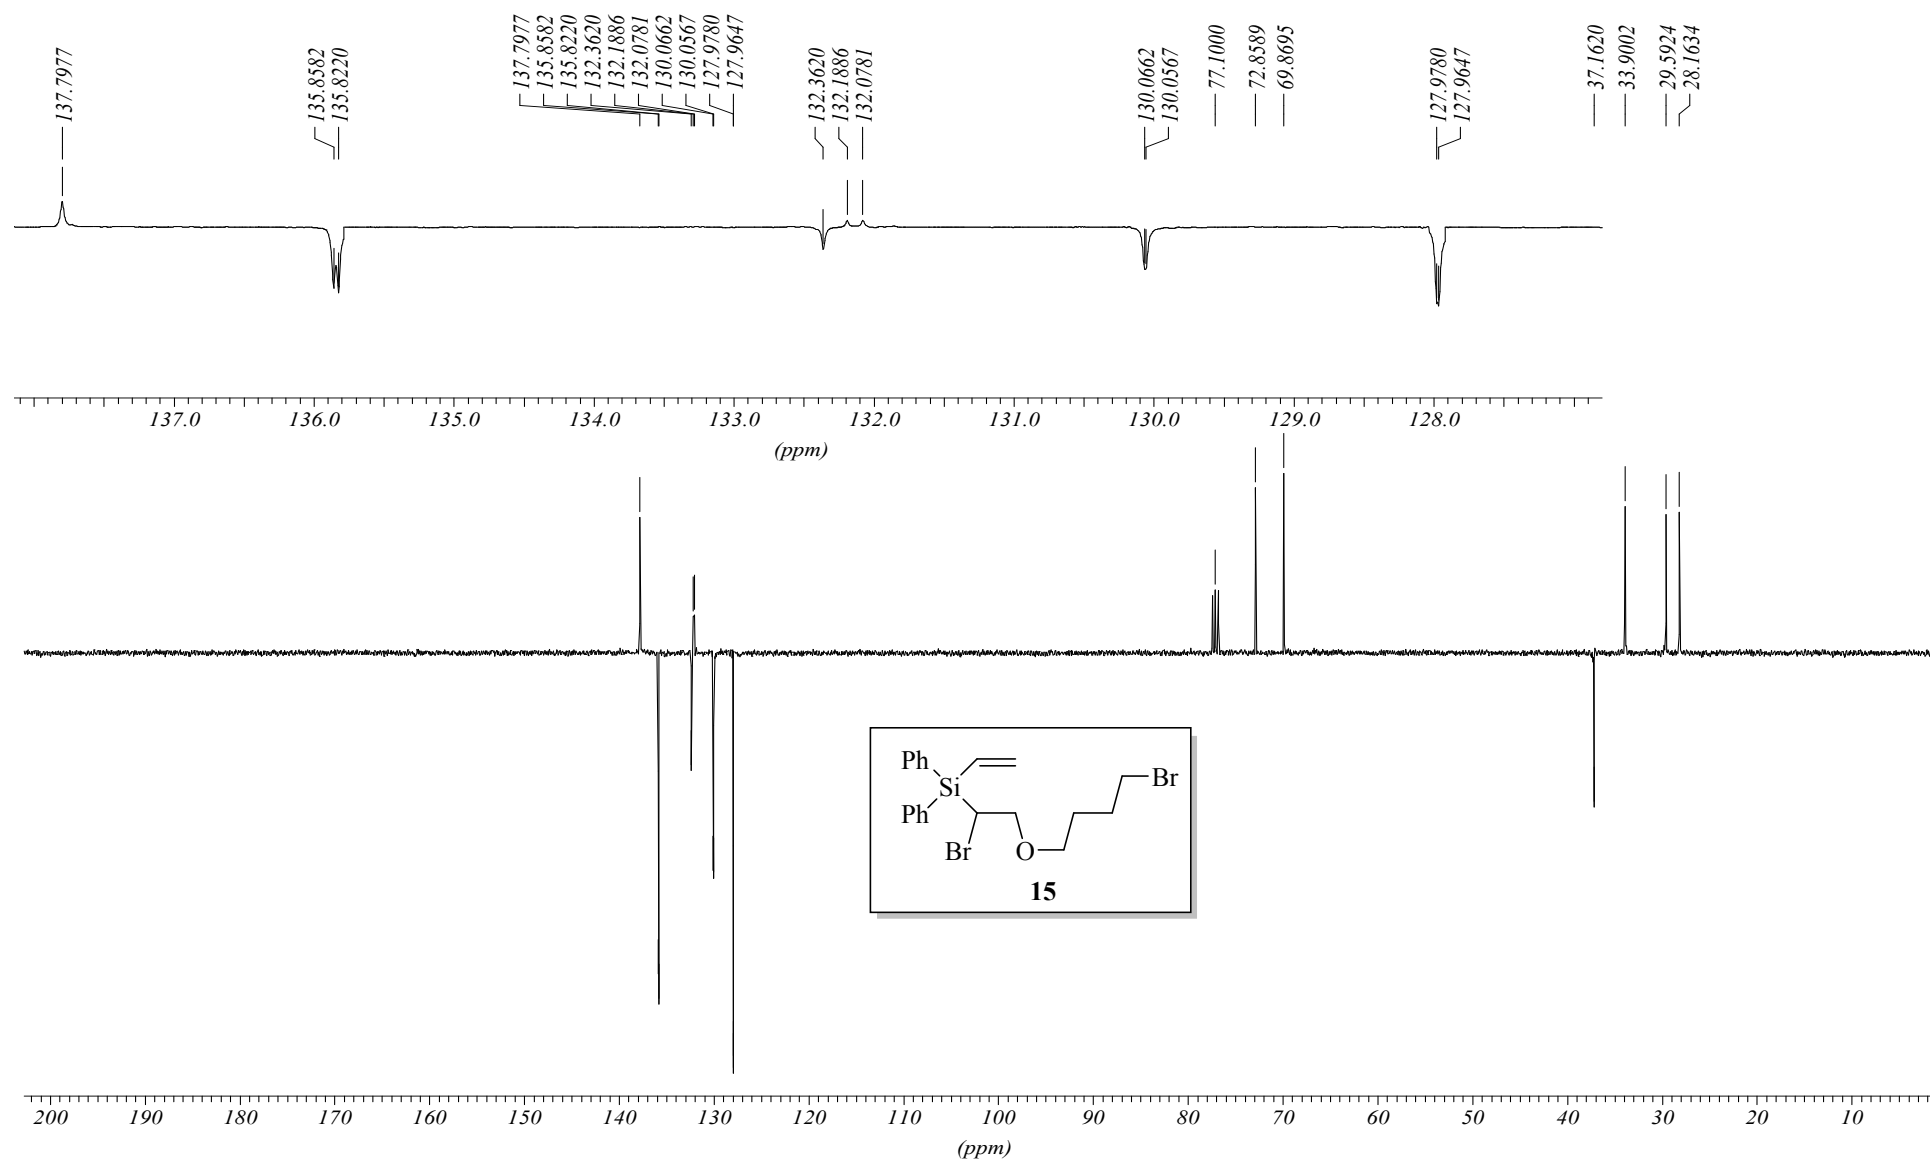

Figure S37. <sup>1</sup>H NMR spectrum of compound **15**

(1-Bromo-2-(4-bromobutoxy)ethyl)dimethyl(vinyl)silane, **15** (R = Me).

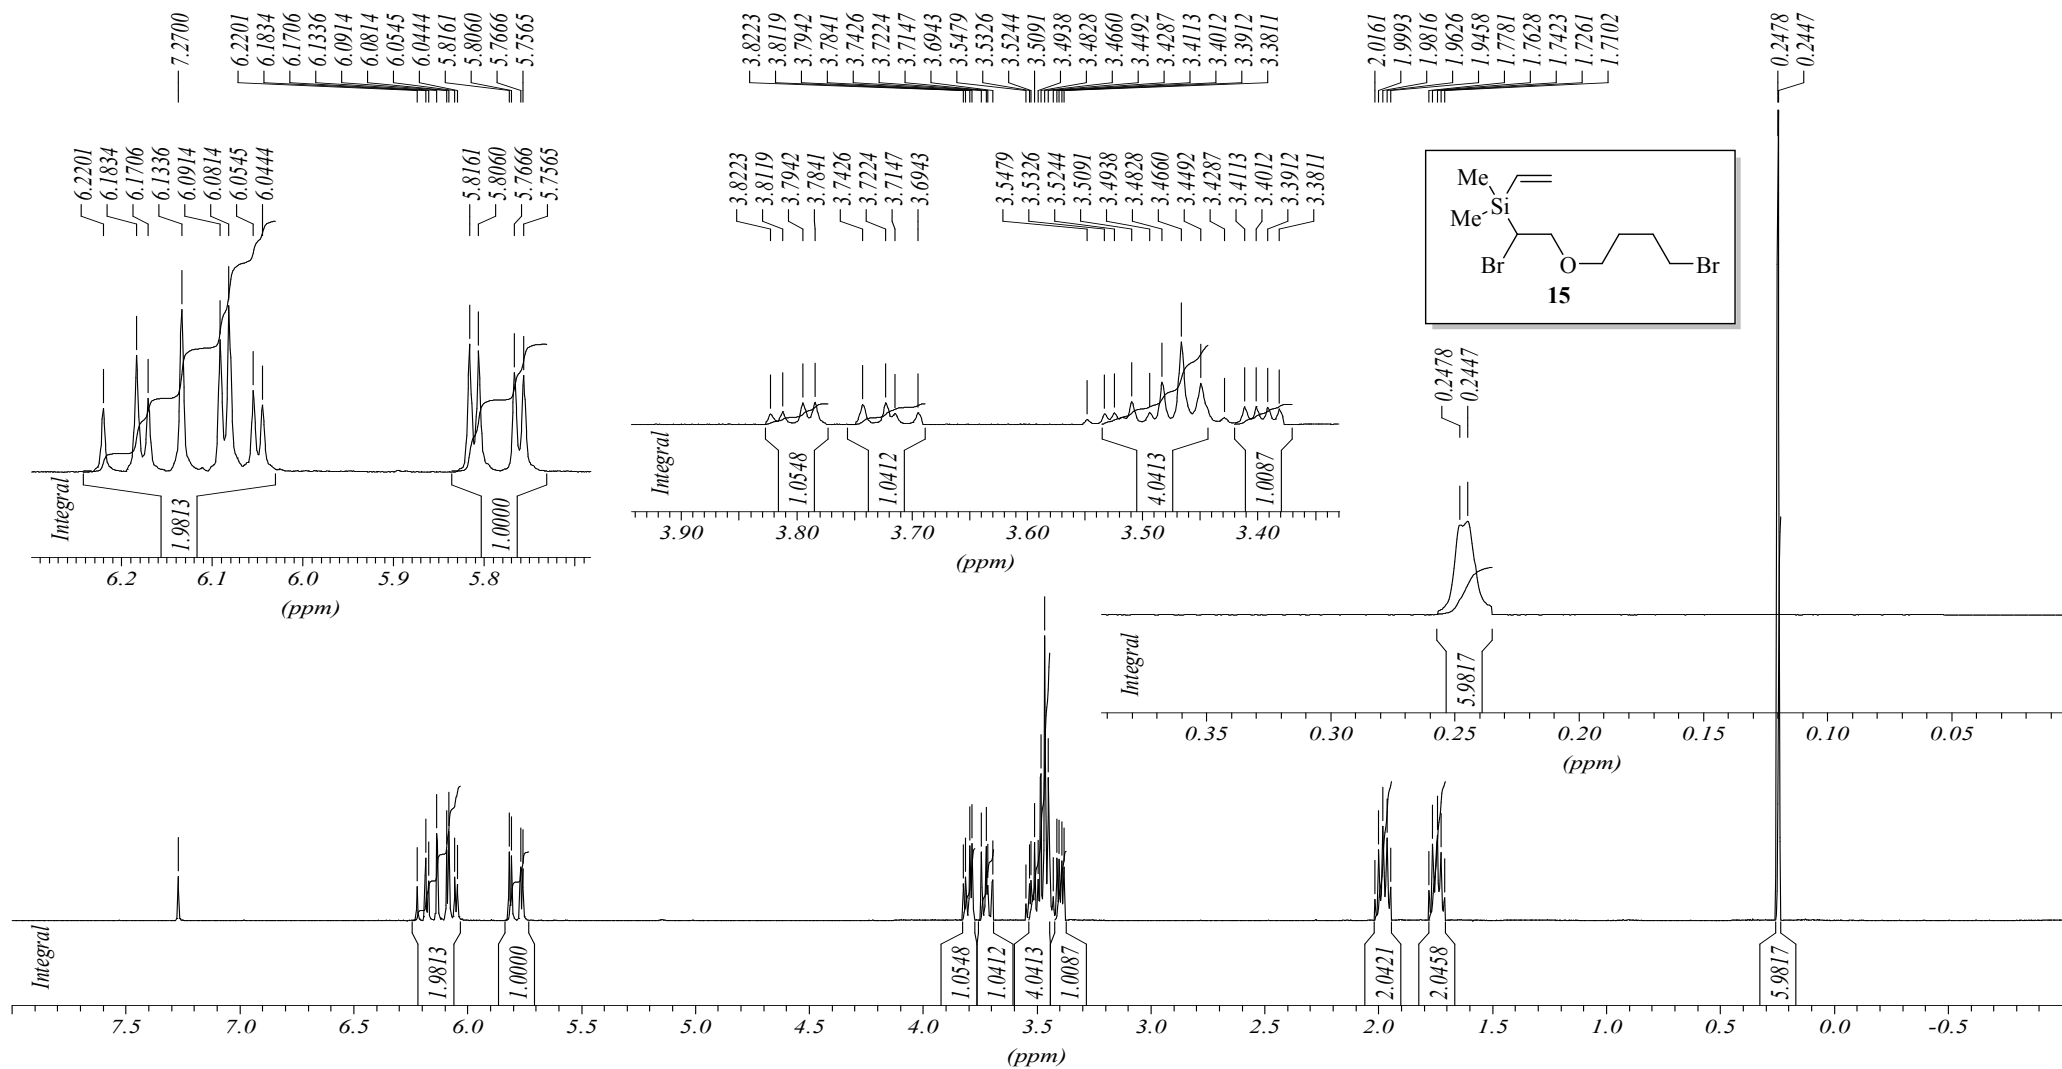

Figure S38.  $^{13}\text{C}$  NMR spectrum of compound **15**

(1-Bromo-2-(4-bromobutoxy)ethyl)dimethyl(vinyl)silane, **15** (R = Me).

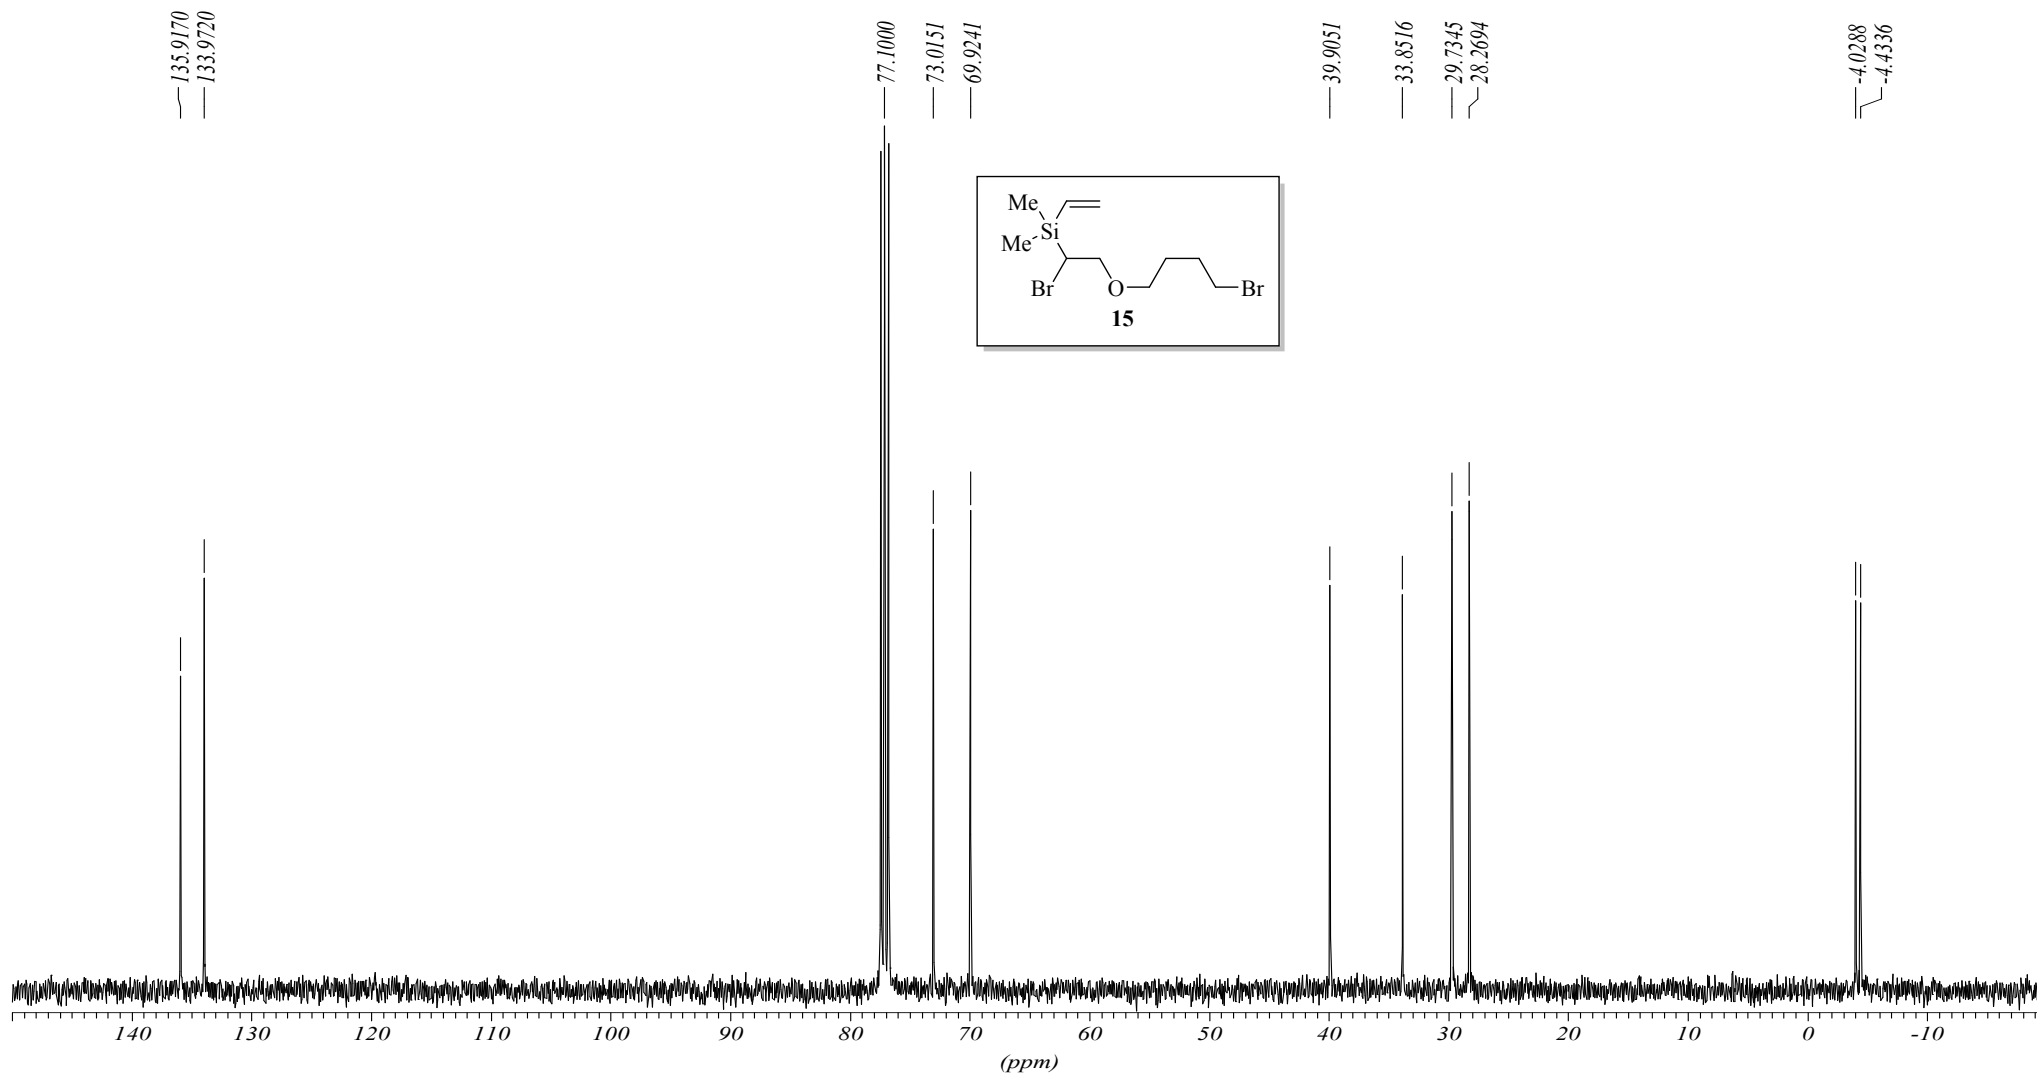

Figure S39.  $^1\text{H}$  NMR spectrum of compound **16a**

*N*-(4-(2-bromo-2-(diphenyl(vinyl)silyl)ethoxy)butyl)trifluoromethanesulfonamide, **16a** (R = Ph).

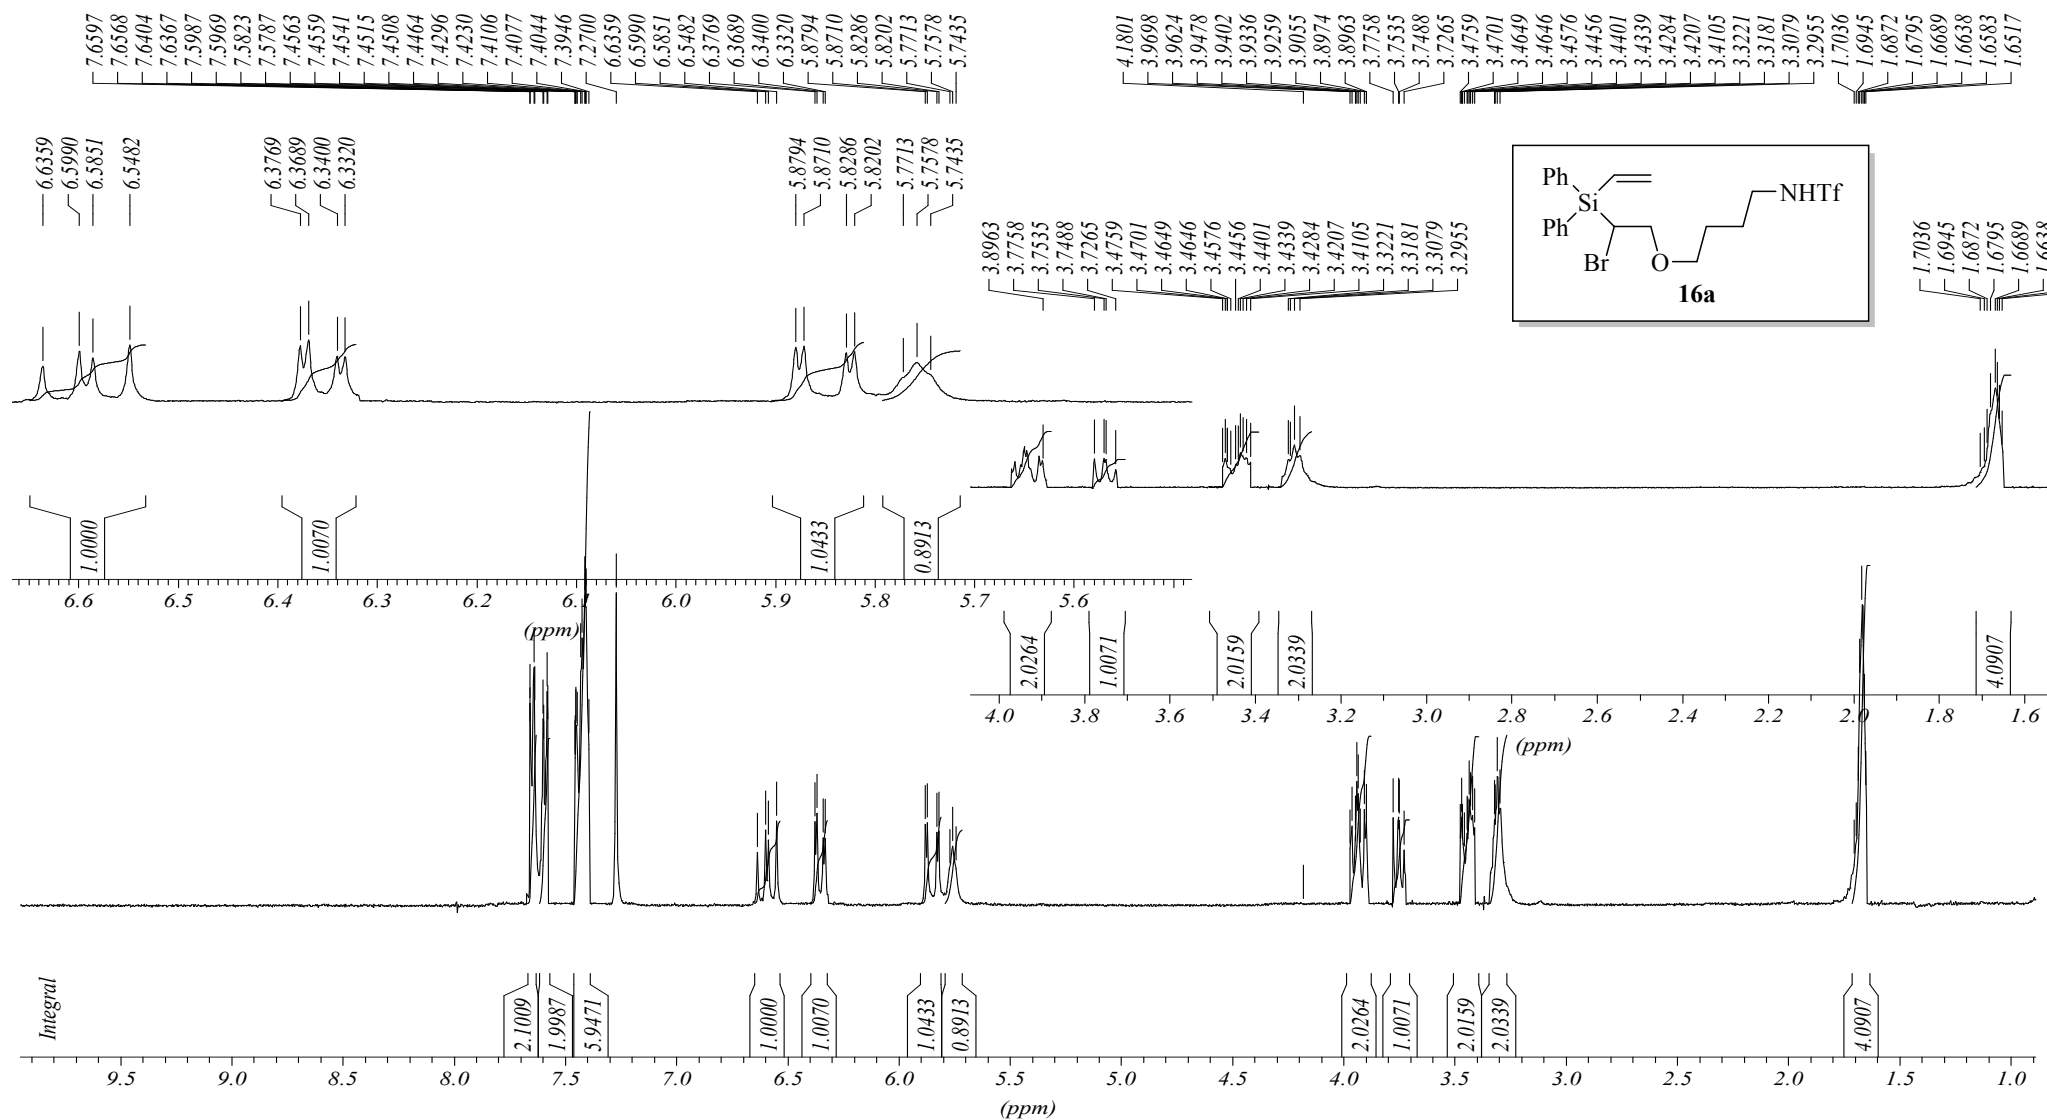

Figure S40. <sup>13</sup>C (*J*-mod) NMR spectrum of compound **16a**



*N*-(4-(2-bromo-2-(diphenyl(vinyl)silyl)ethoxy)butyl)trifluoromethanesulfonamide, **16a** (R = Ph).

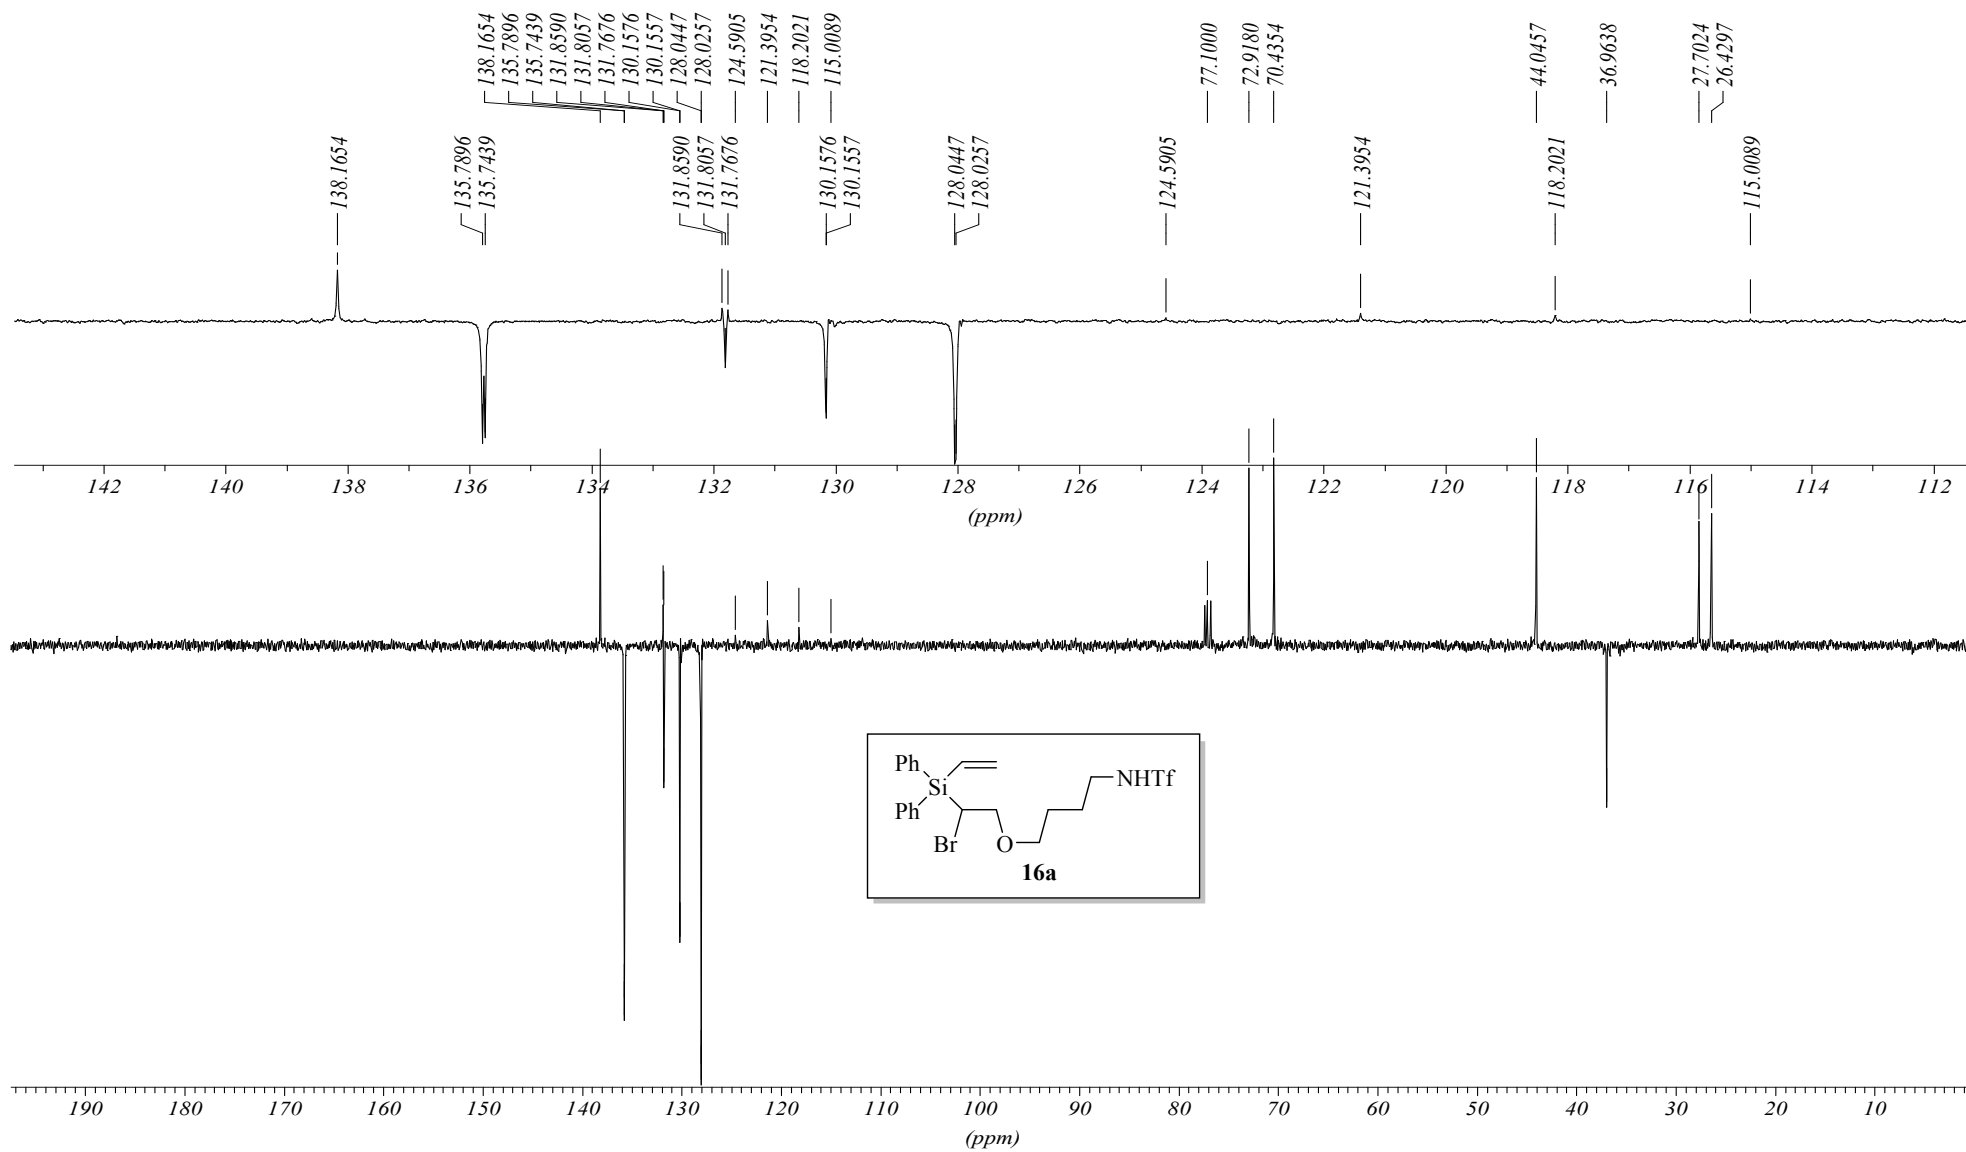

Figure S41. <sup>1</sup>H NMR spectrum of compound **16d**

*N*-(4-(2-bromo-2-(diphenyl(vinyl)silyl)ethoxy)butyl)-4-nitrobenzenesulfonamide, **16d** (R = Ph).

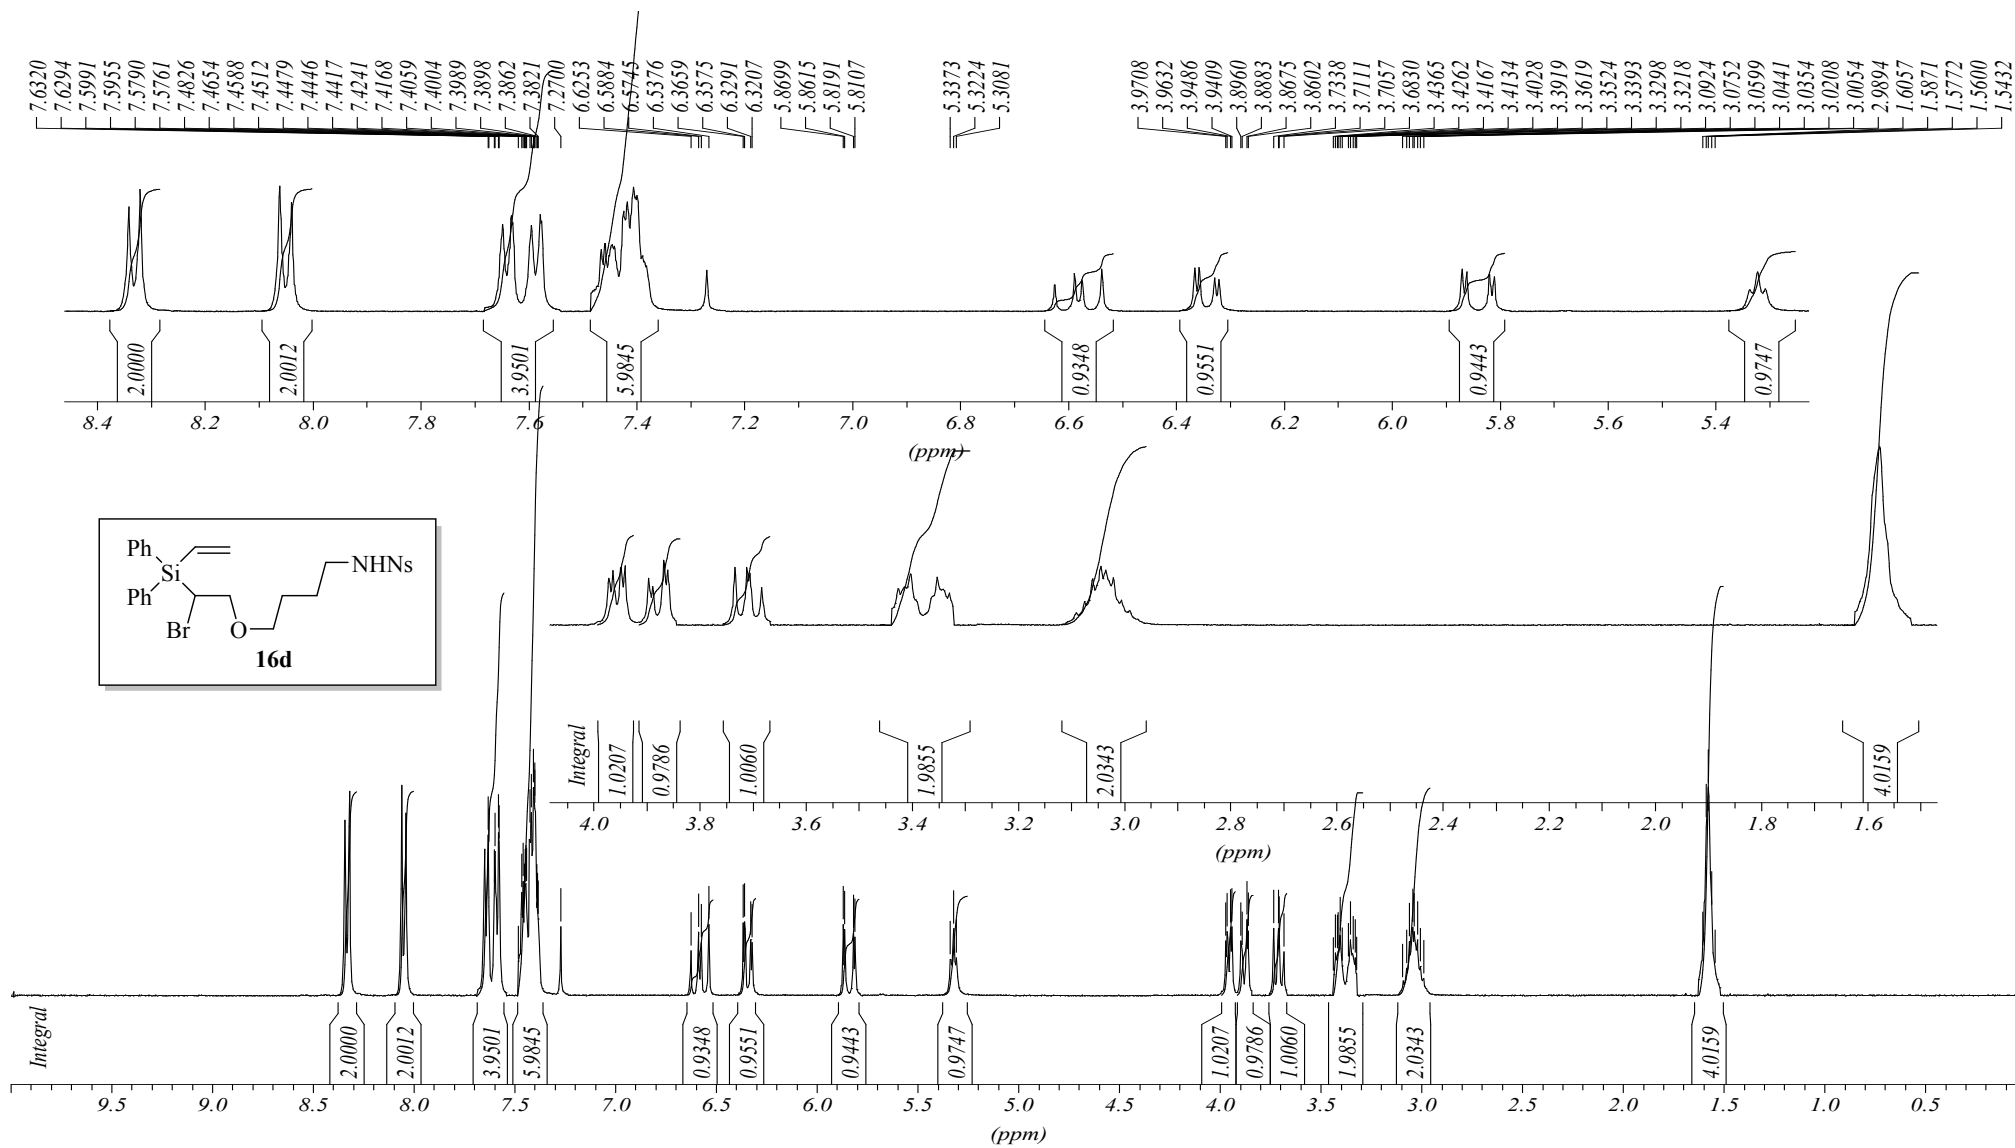

Figure S42. <sup>13</sup>C NMR spectrum of compound **16d**

*N*-(4-(2-bromo-2-(diphenyl(vinyl)silyl)ethoxy)butyl)-4-nitrobenzenesulfonamide, **16d** (R = Ph).

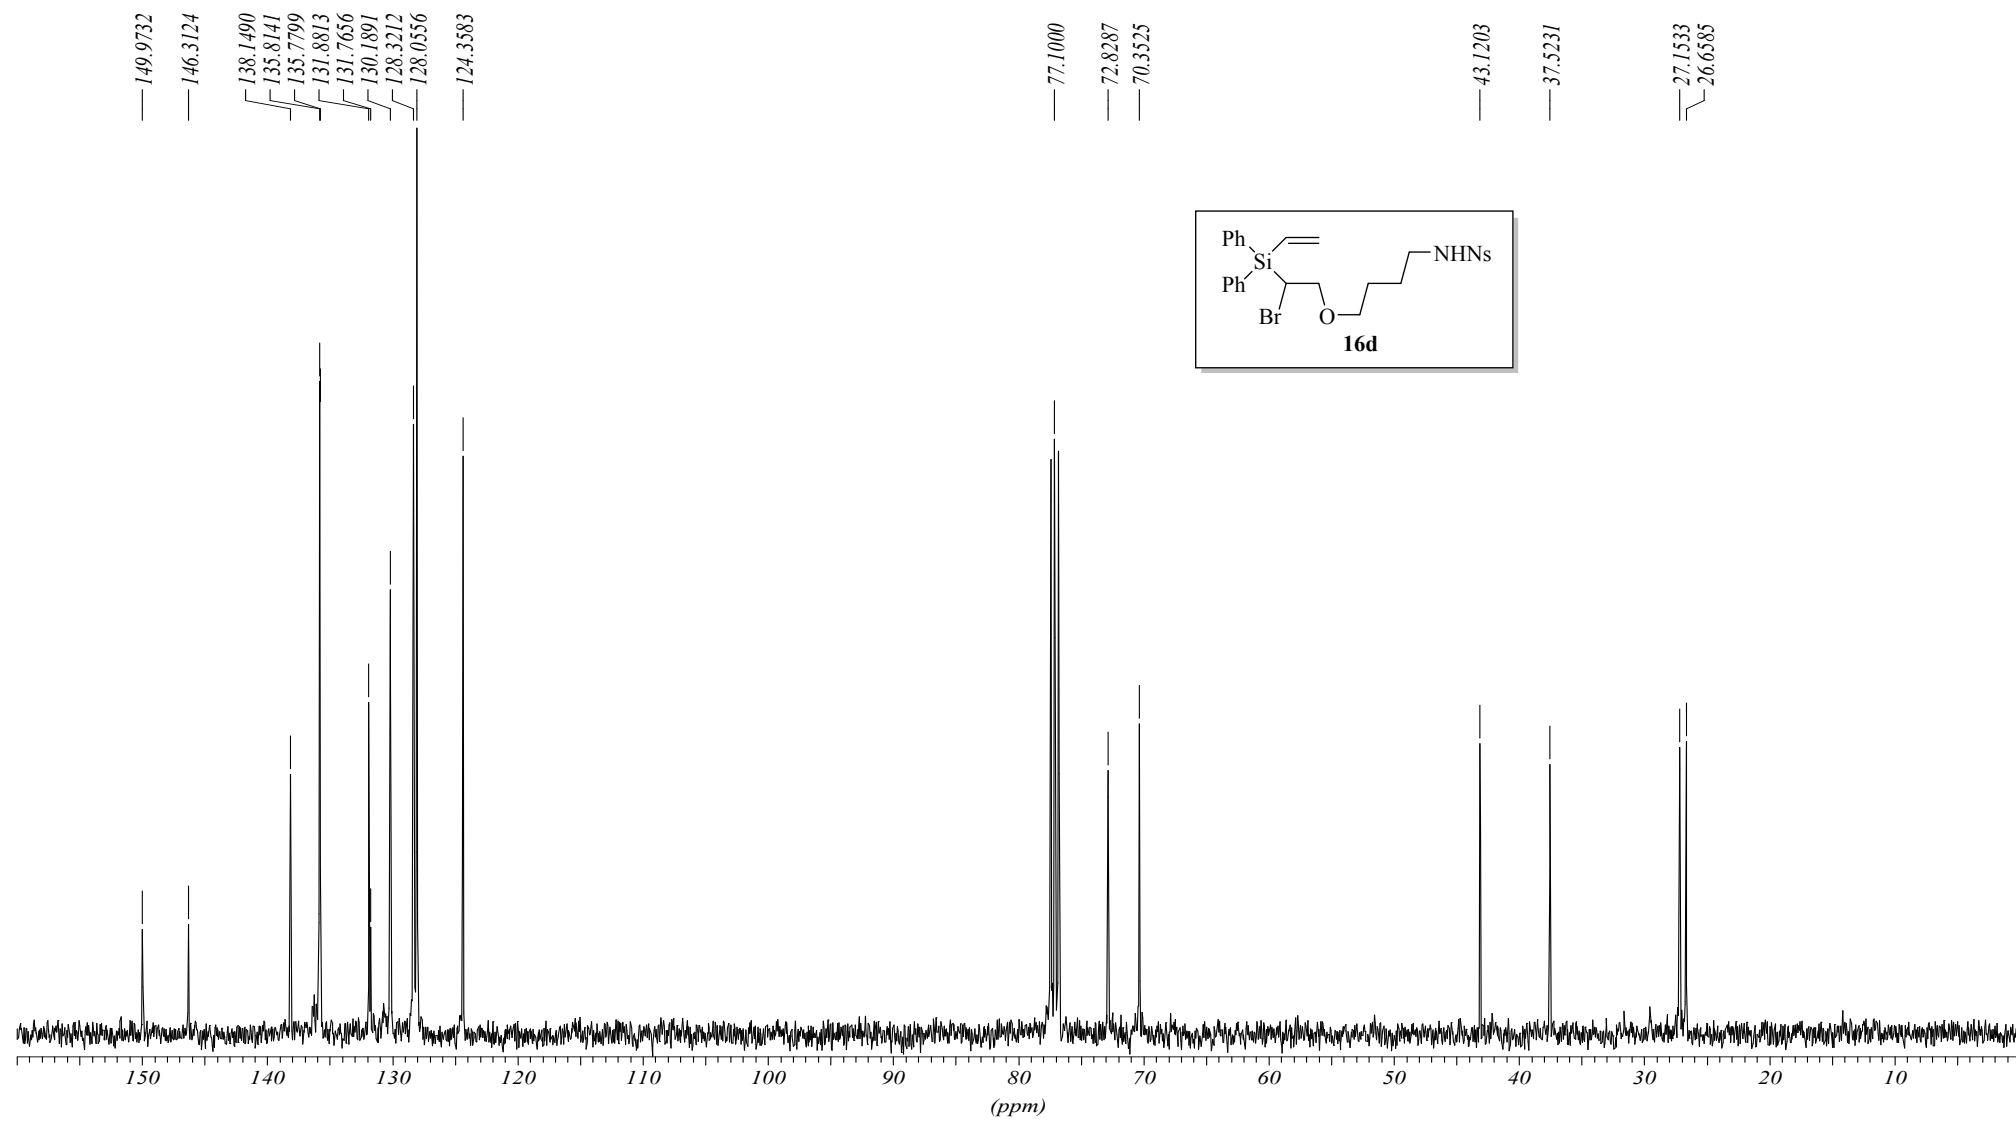

Figure S43.  $^{13}\text{C}$  (J-mod) NMR spectrum of compound **16d**

*N*-(4-(2-bromo-2-(diphenyl(vinyl)silyl)ethoxy)butyl)-4-nitrobenzenesulfonamide, **16d** (R = Ph).

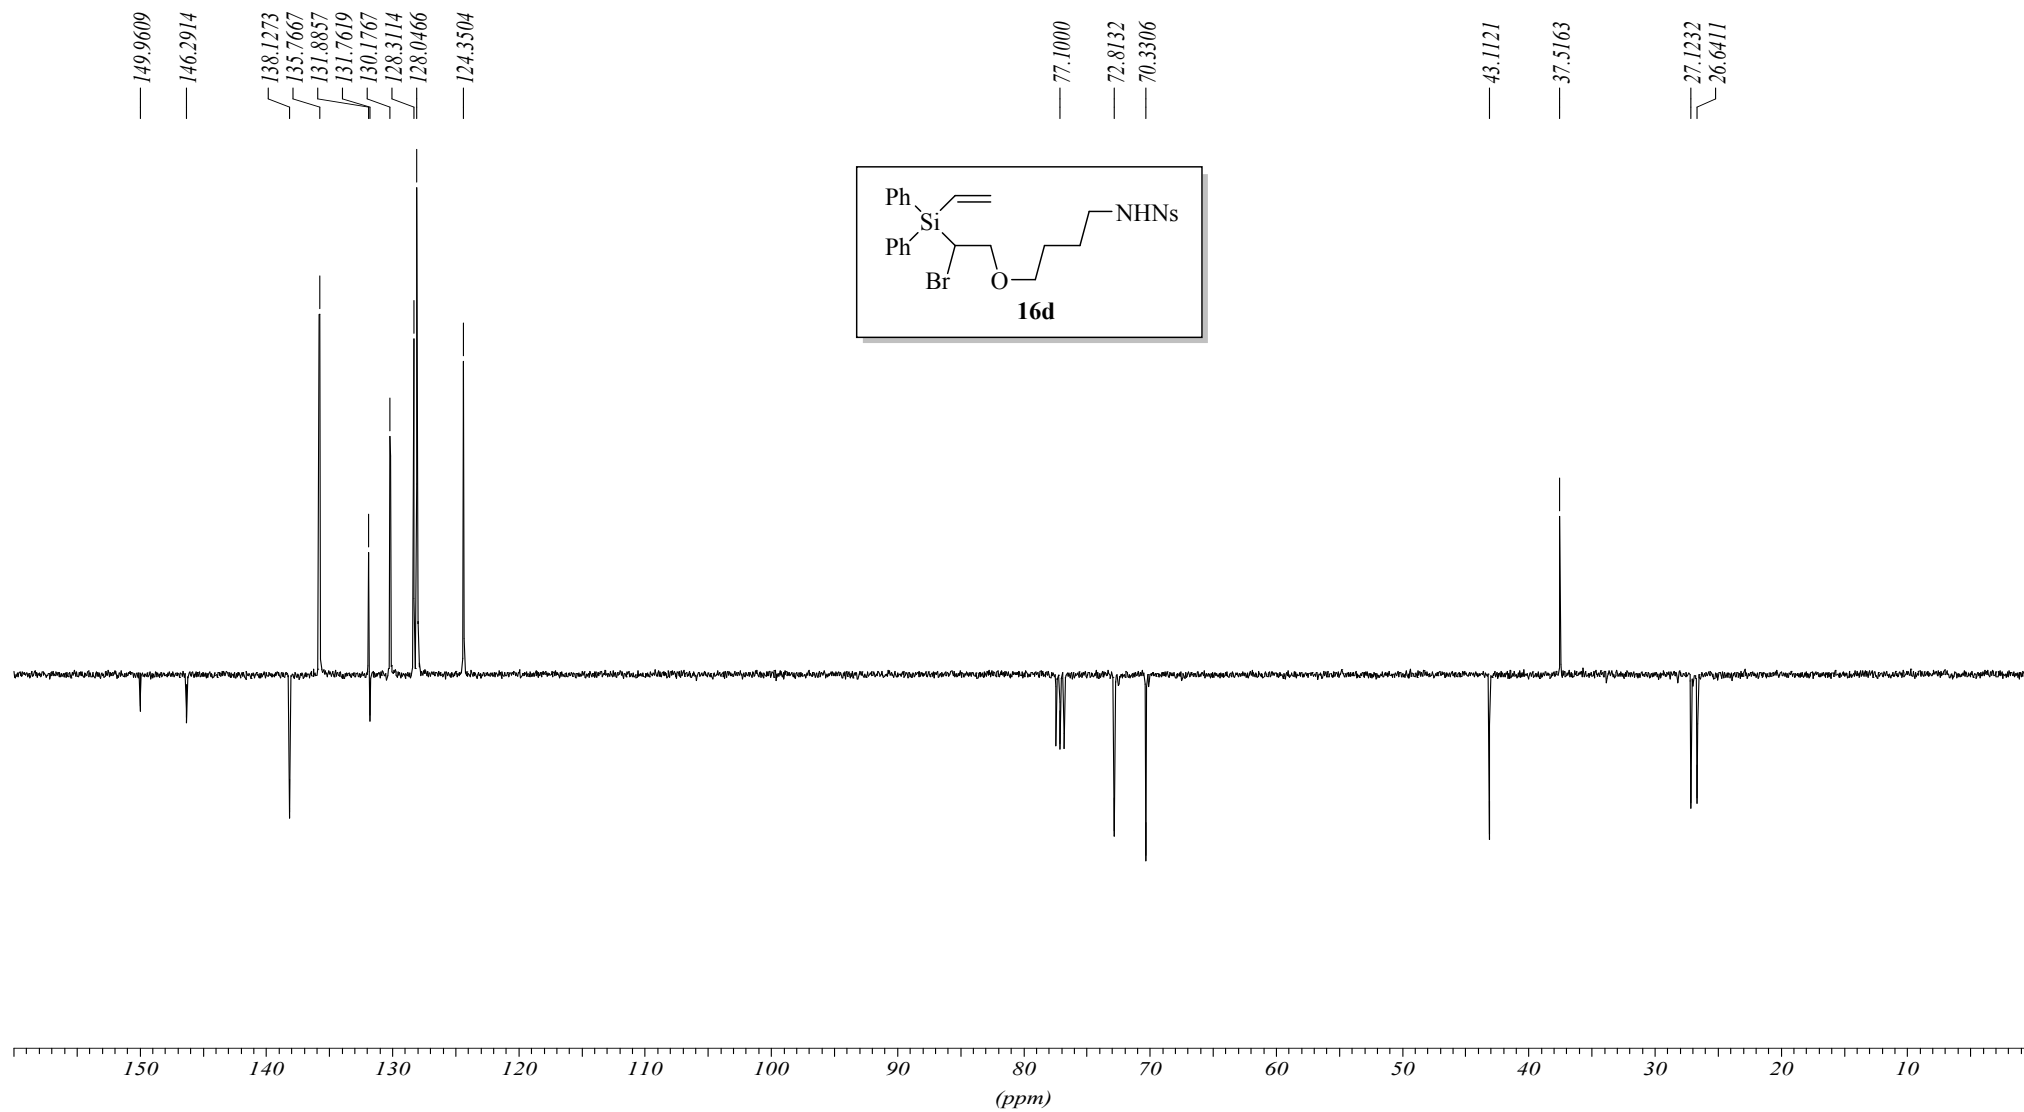

Figure S44. <sup>1</sup>H NMR spectrum of compound **16a**

*N*-(4-(2-bromo-2-(dimethyl(vinyl)silyl)ethoxy)butyl)trifluoromethanesulfonamide, **16a** (R = Me).

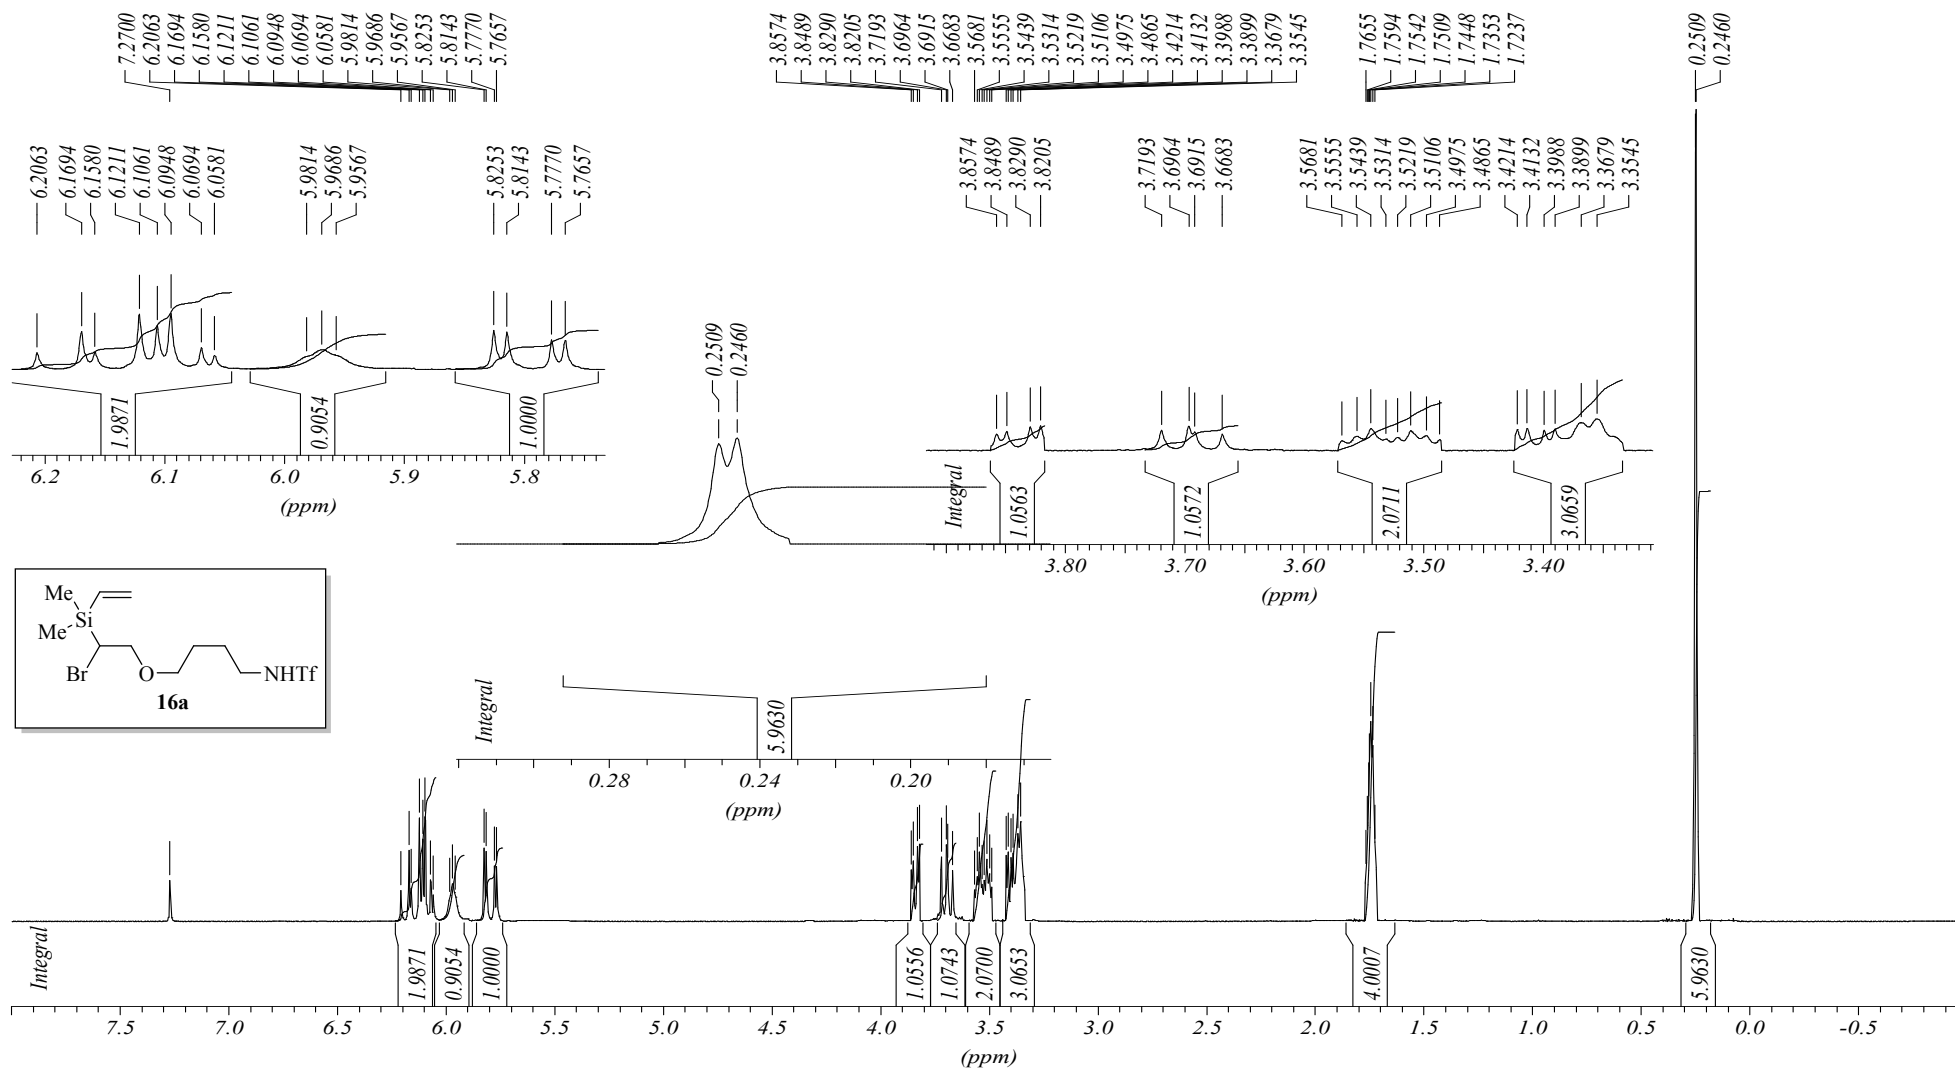

Figure S45. <sup>13</sup>C NMR spectrum of compound **16a**

*N*-(4-(2-bromo-2-(dimethyl(vinyl)silyl)ethoxy)butyl) trifluoromethanesulfonamide, **16a** (R = Me).

135.3386  
134.2162

124.5426  
121.3466  
118.1528  
114.9632

77.1000  
72.8758  
70.3118

44.0650  
39.7616

27.6267  
26.4079

-4.3544  
-4.8192

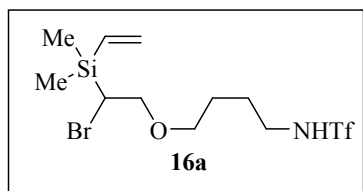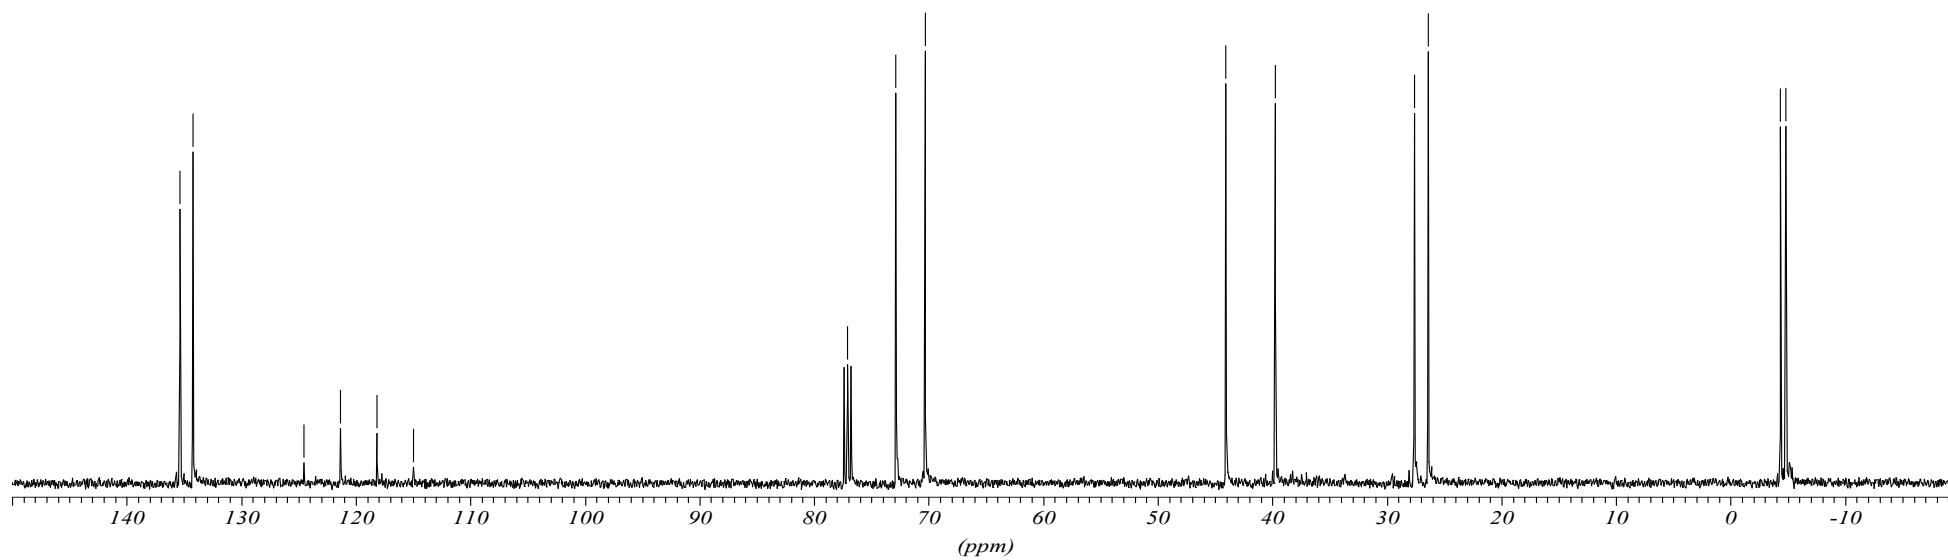

Figure S46. <sup>1</sup>H NMR spectrum of compound **16b**

*N*-(4-(2-Bromo-2-(dimethyl(vinyl)silyl)ethoxy)butyl)methanesulfonamide, **16b** (R = Me).

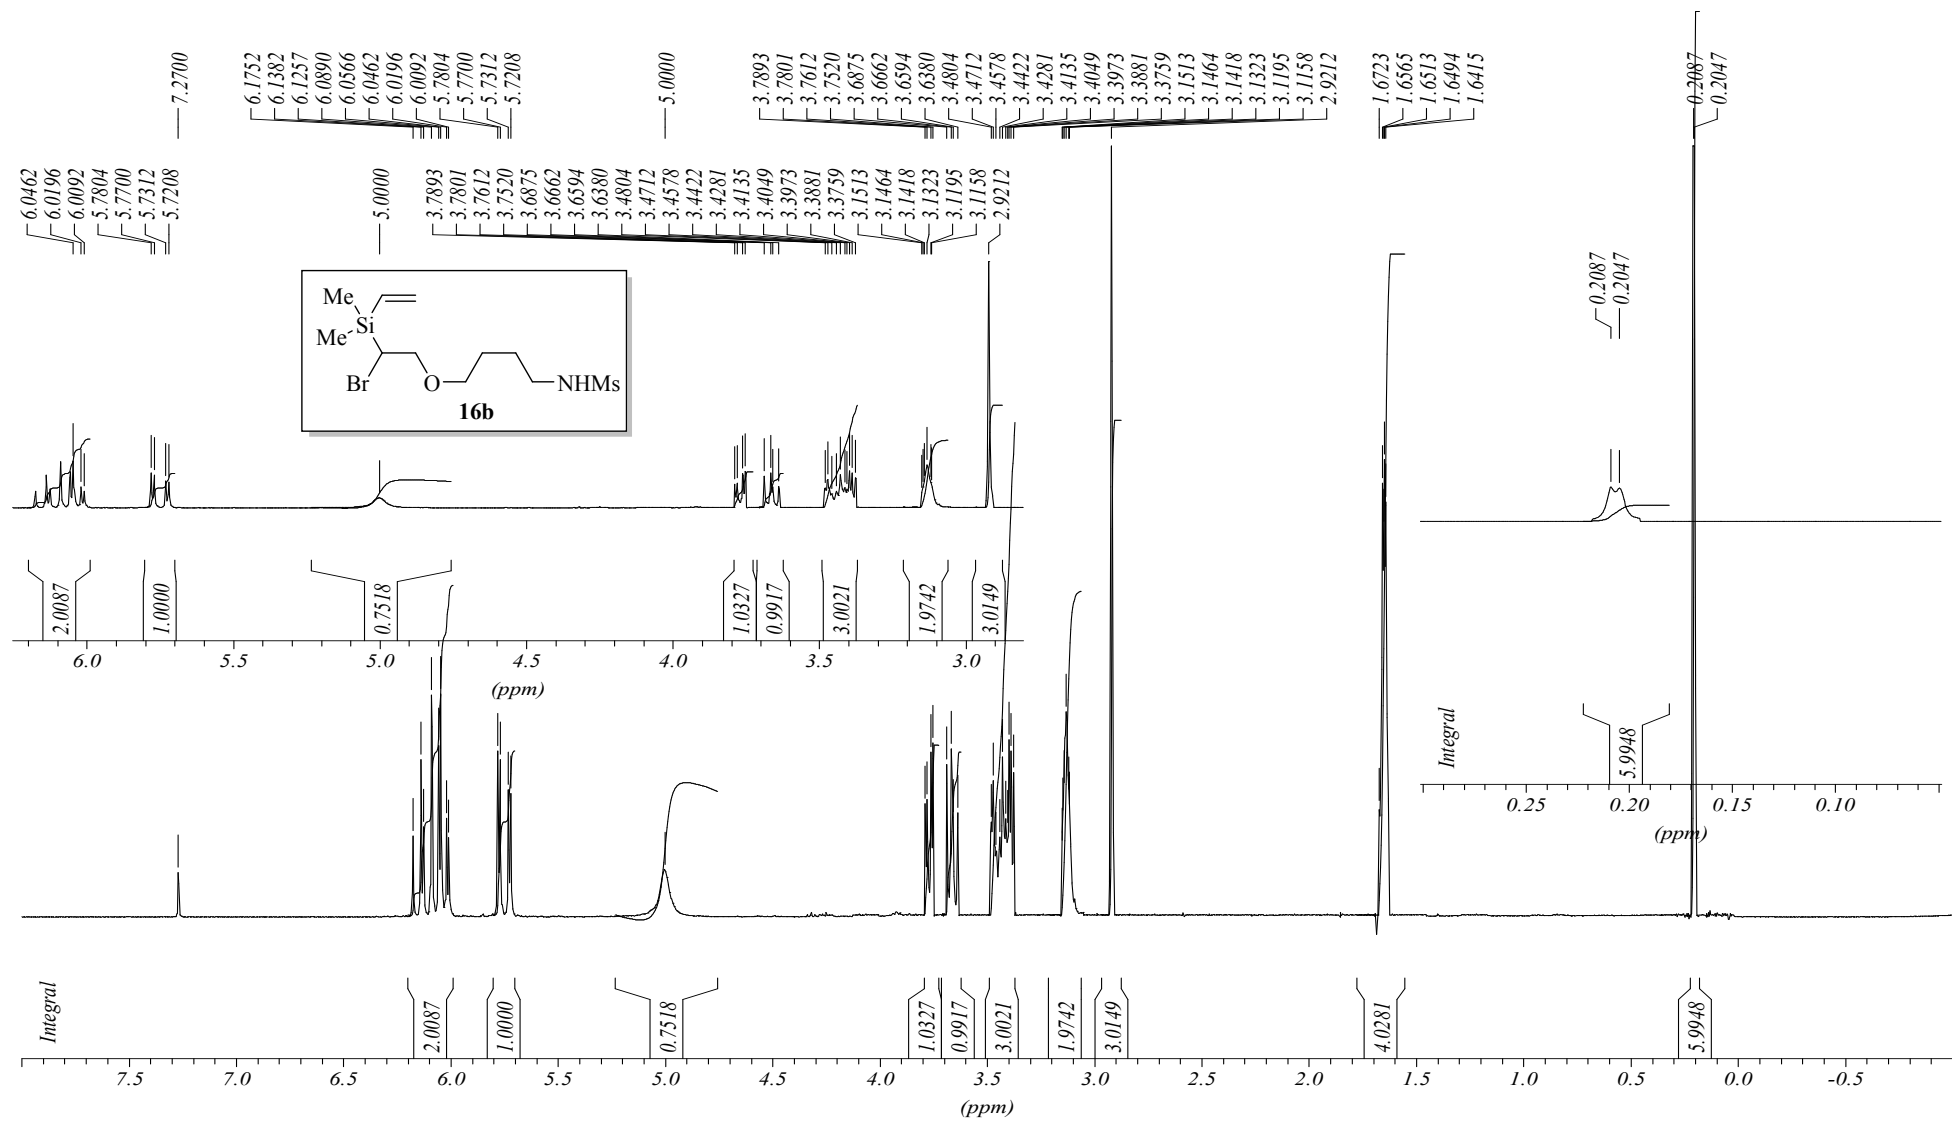

Figure S47.  $^{13}\text{C}$  NMR spectrum of compound **16b**

*N*-(4-(2-Bromo-2-(dimethyl(vinyl)silyl)ethoxy)butyl)methanesulfonamide, **16b** (R = Me).

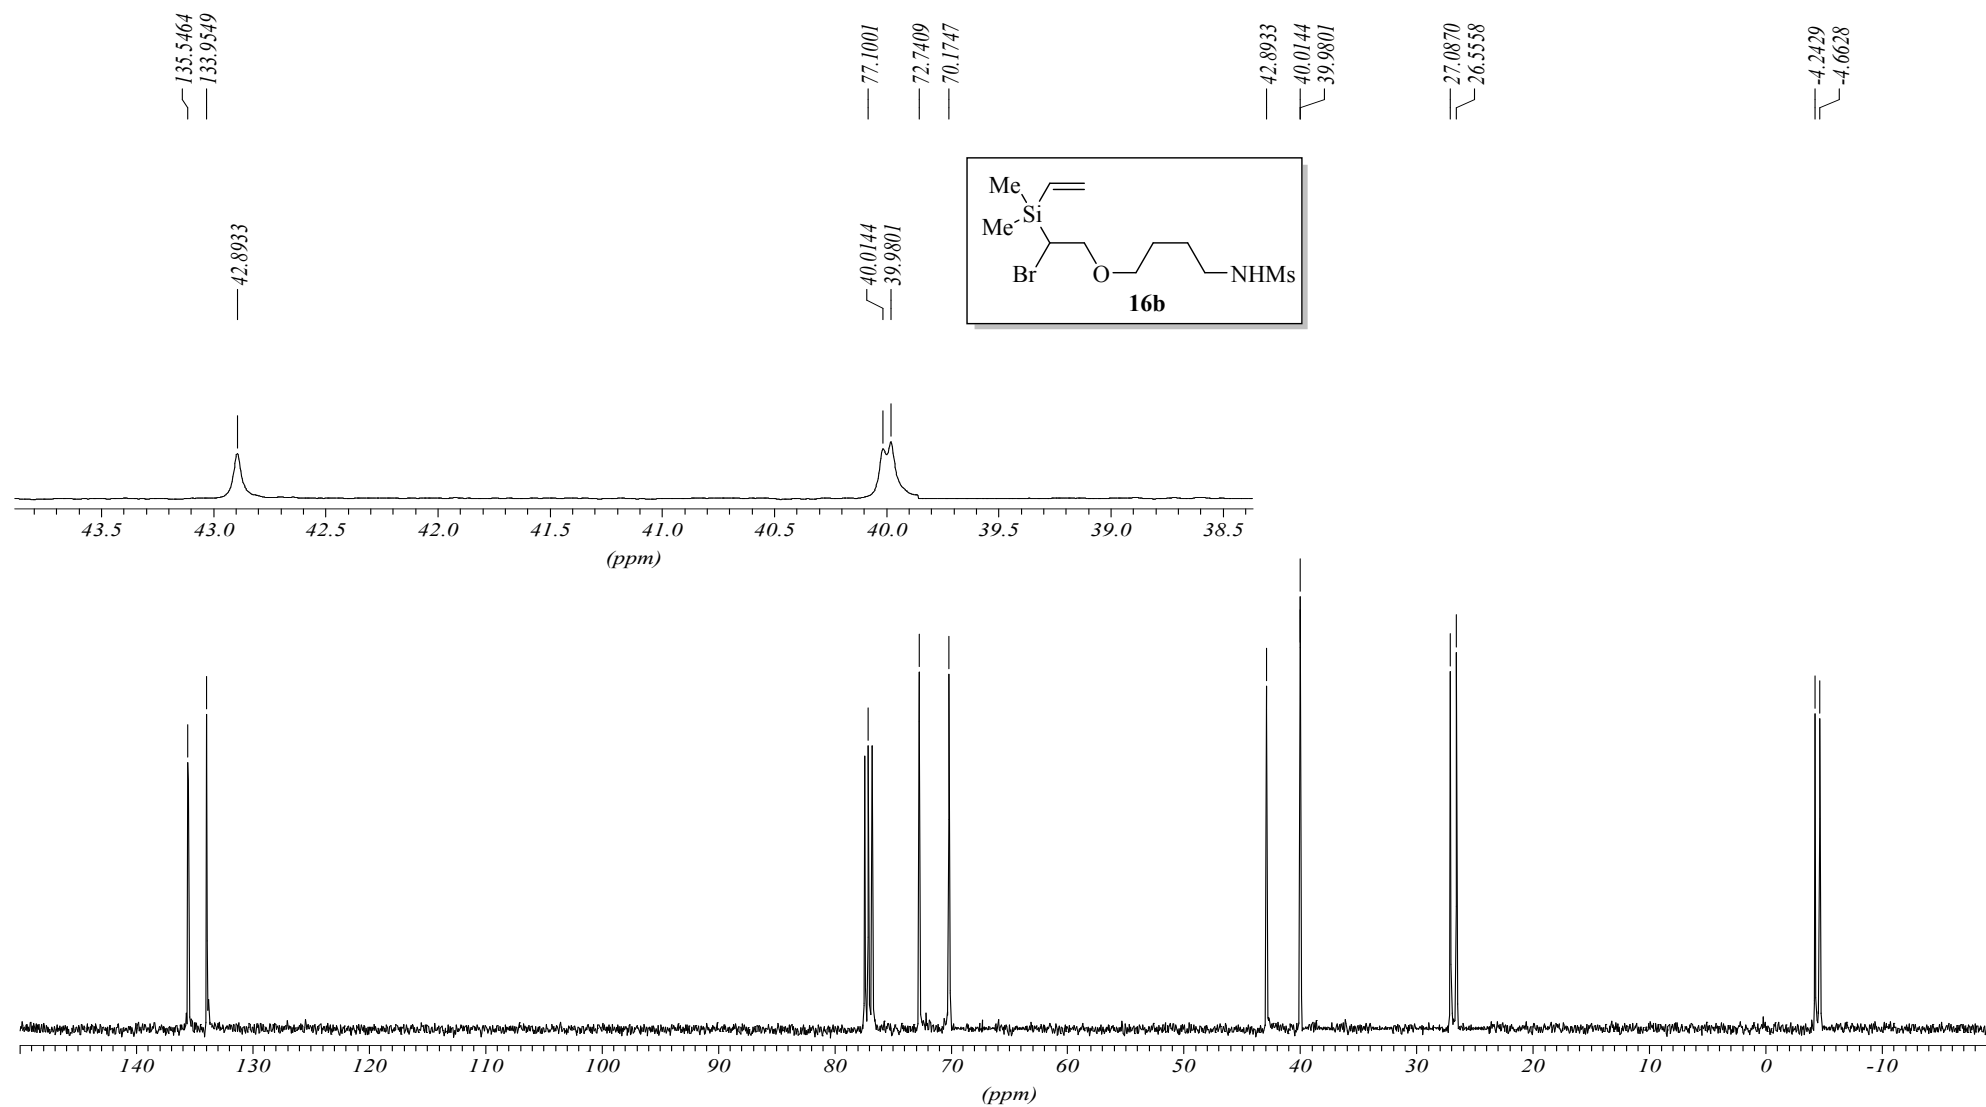



Figure S48. <sup>1</sup>H NMR spectrum of compound **16c**

*N*-(4-(2-bromo-2-(dimethyl(vinyl)silyl)ethoxy)butyl)-4-methylbenzenesulfonamide, **16c** (R = Me).

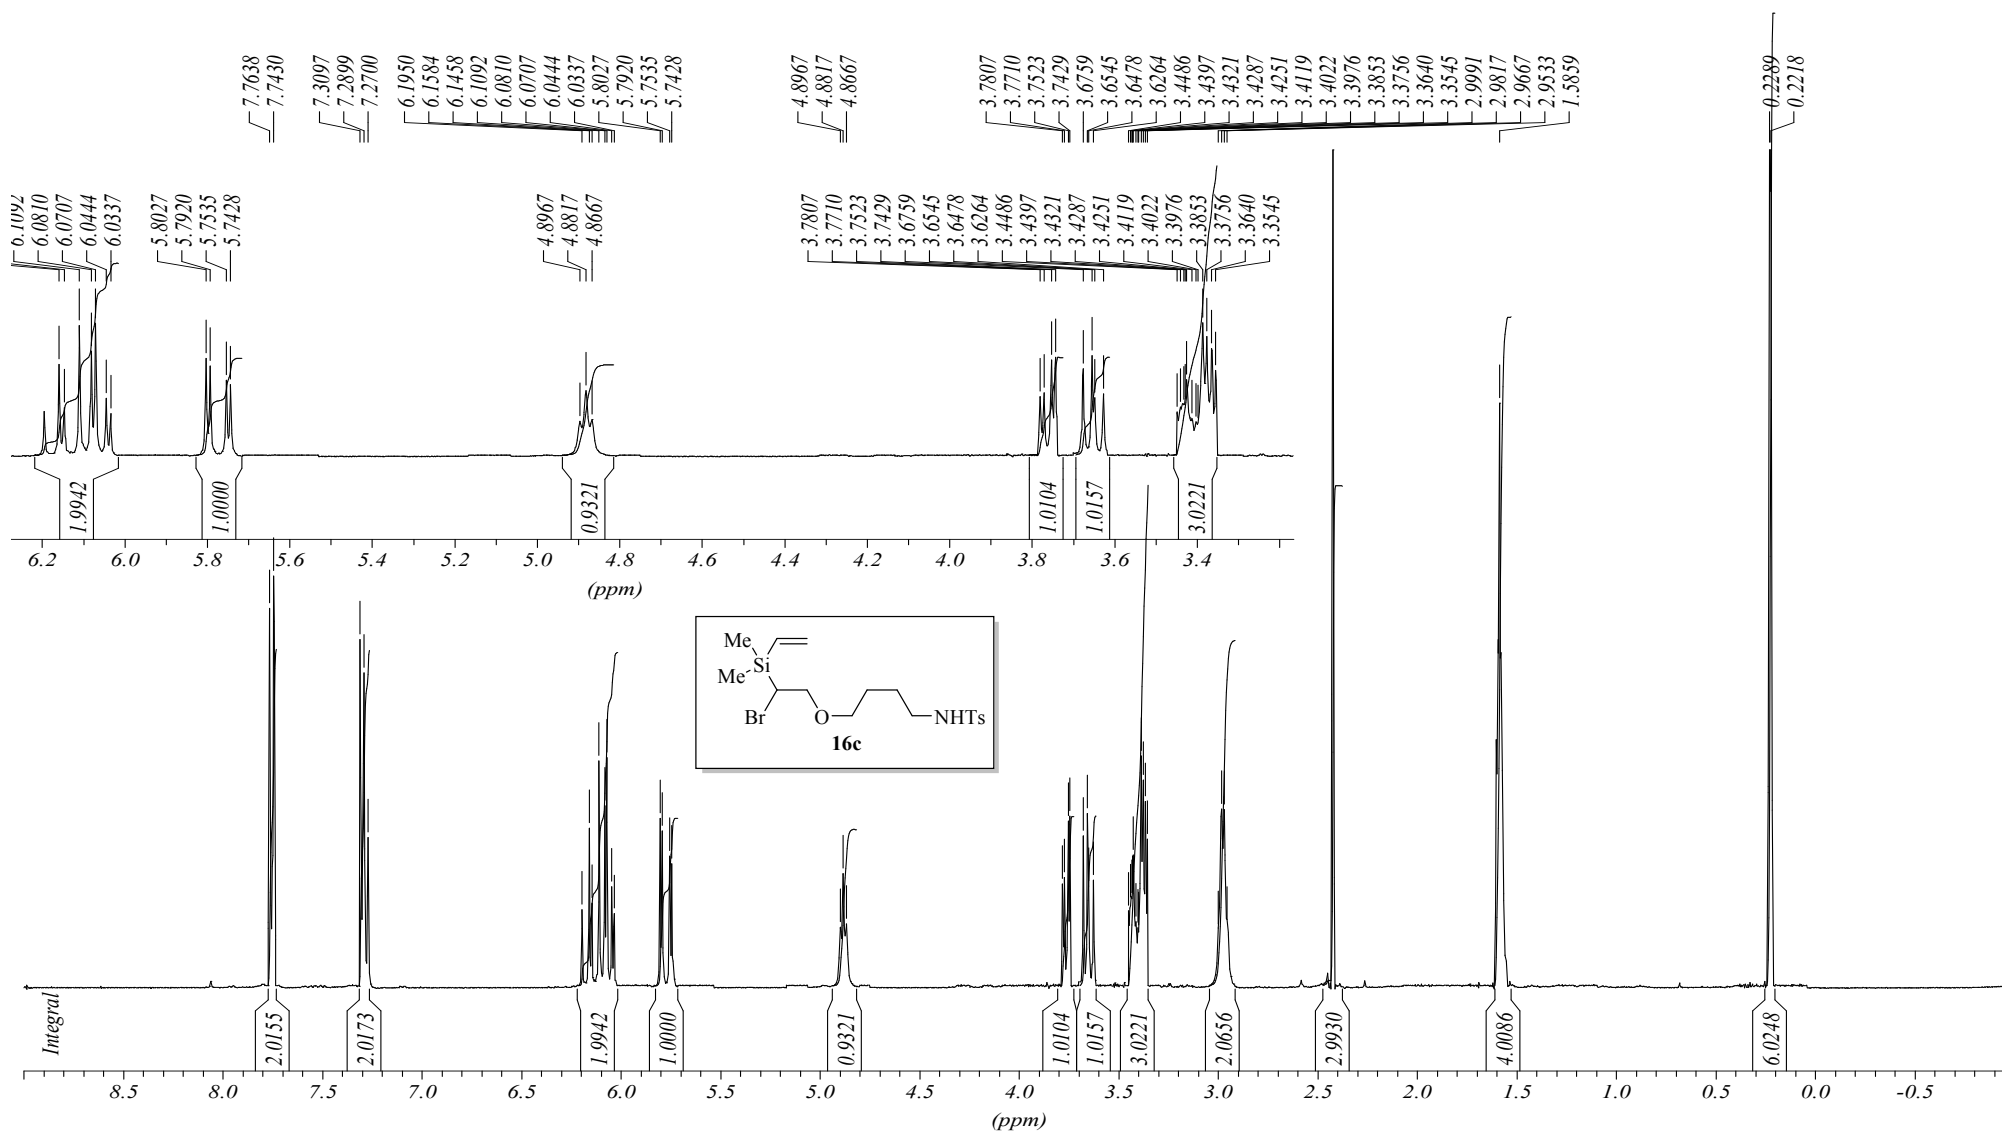

Figure S49.  $^{13}\text{C}$  NMR spectrum of compound **16c**

*N*-(4-(2-bromo-2-(dimethyl(vinyl)silyl)ethoxy)butyl)-4-methylbenzenesulfonamide, **16c** (R = Me).

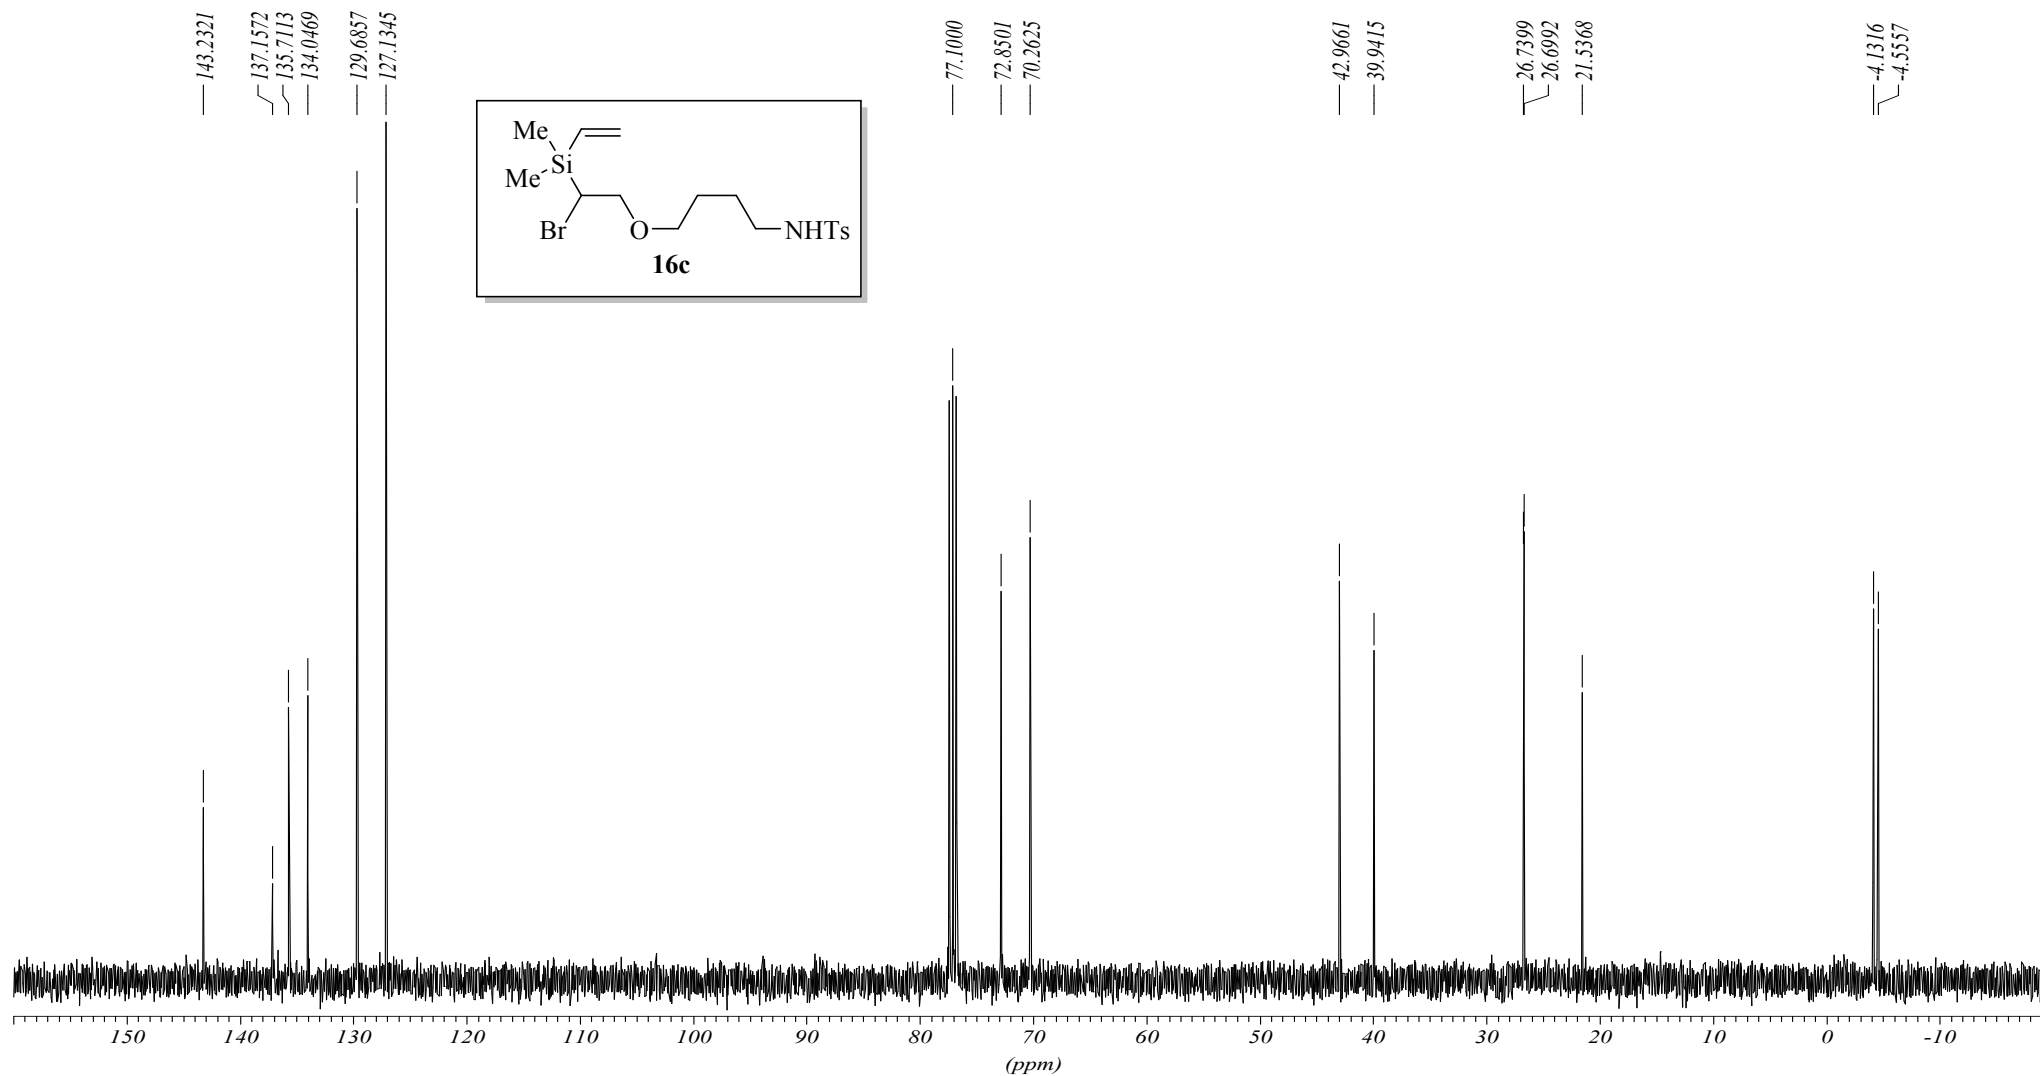

Figure S50. <sup>1</sup>H NMR spectrum of compound **16d**

*N*-(4-(2-Bromo-2-(dimethyl(vinyl)silyl)ethoxy)butyl)-4-nitrobenzenesulfonamide, **16d** (R = Me).

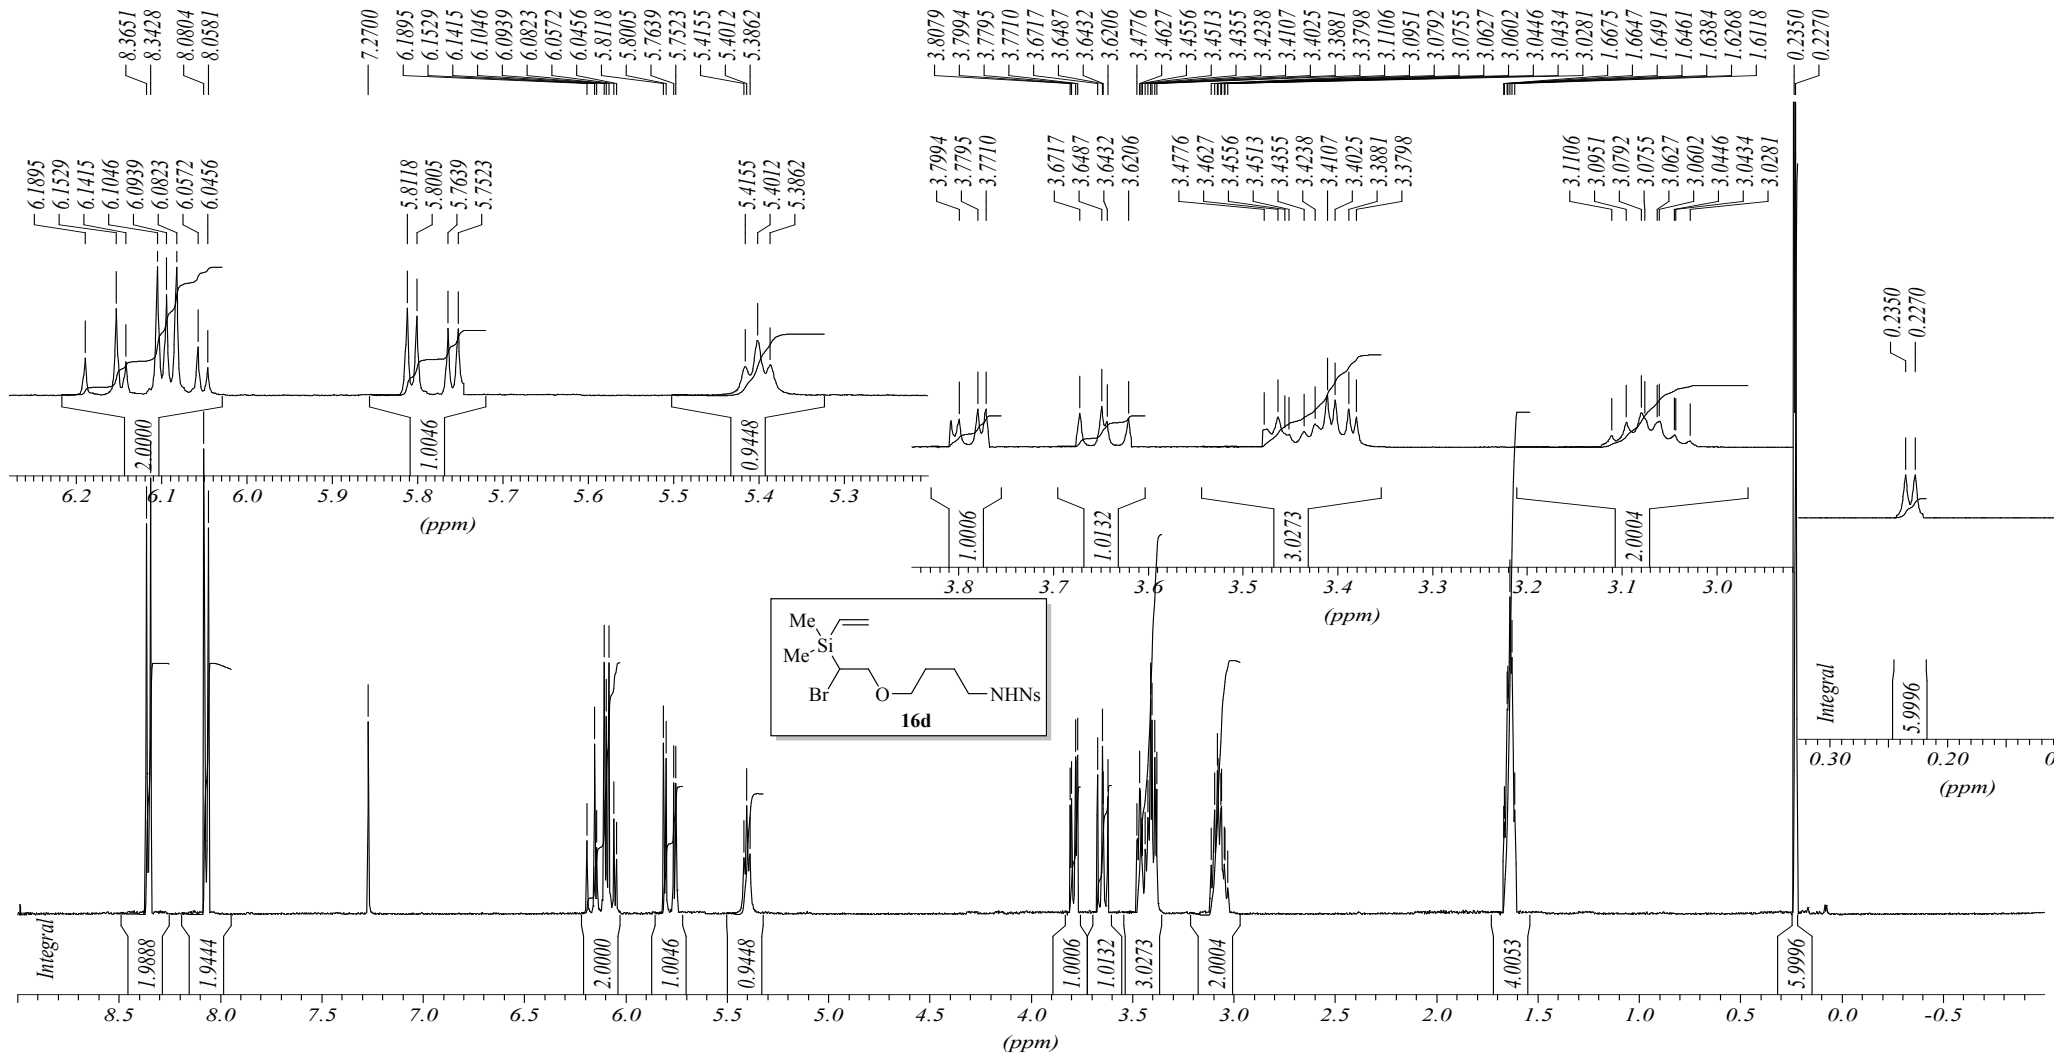

Figure S51.  $^{13}\text{C}$  NMR spectrum of compound **16d**

*N*-(4-(2-Bromo-2-(dimethyl(vinyl)silyl)ethoxy)butyl)-4-nitrobenzenesulfonamide, **16d** (R = Me).

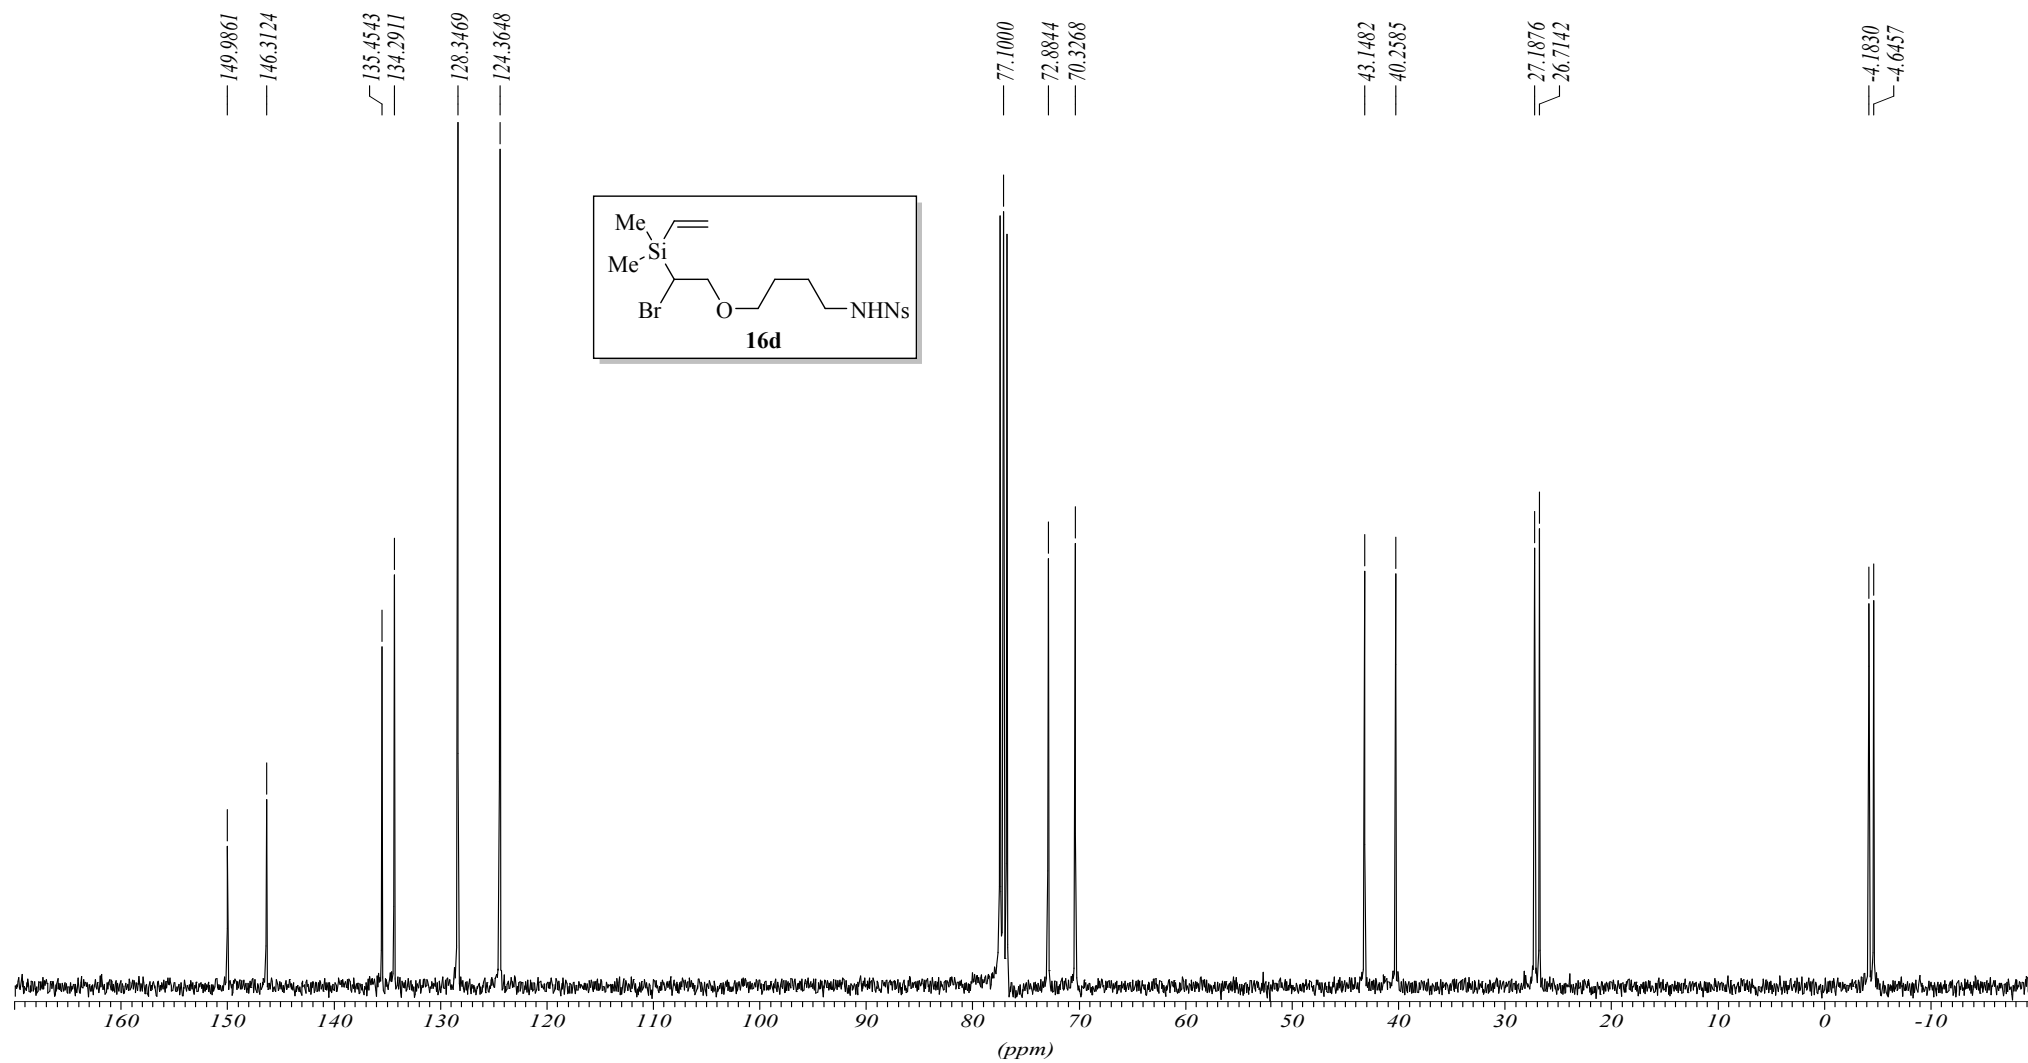

Figure S52. <sup>1</sup>H NMR spectrum of compound **18**

5-(Dimethyl(vinyl)silyl)-2-methyl-1-((trifluoromethyl)sulfonyl)-4,5-dihydro-1H-imidazole, **18** (R = Me).

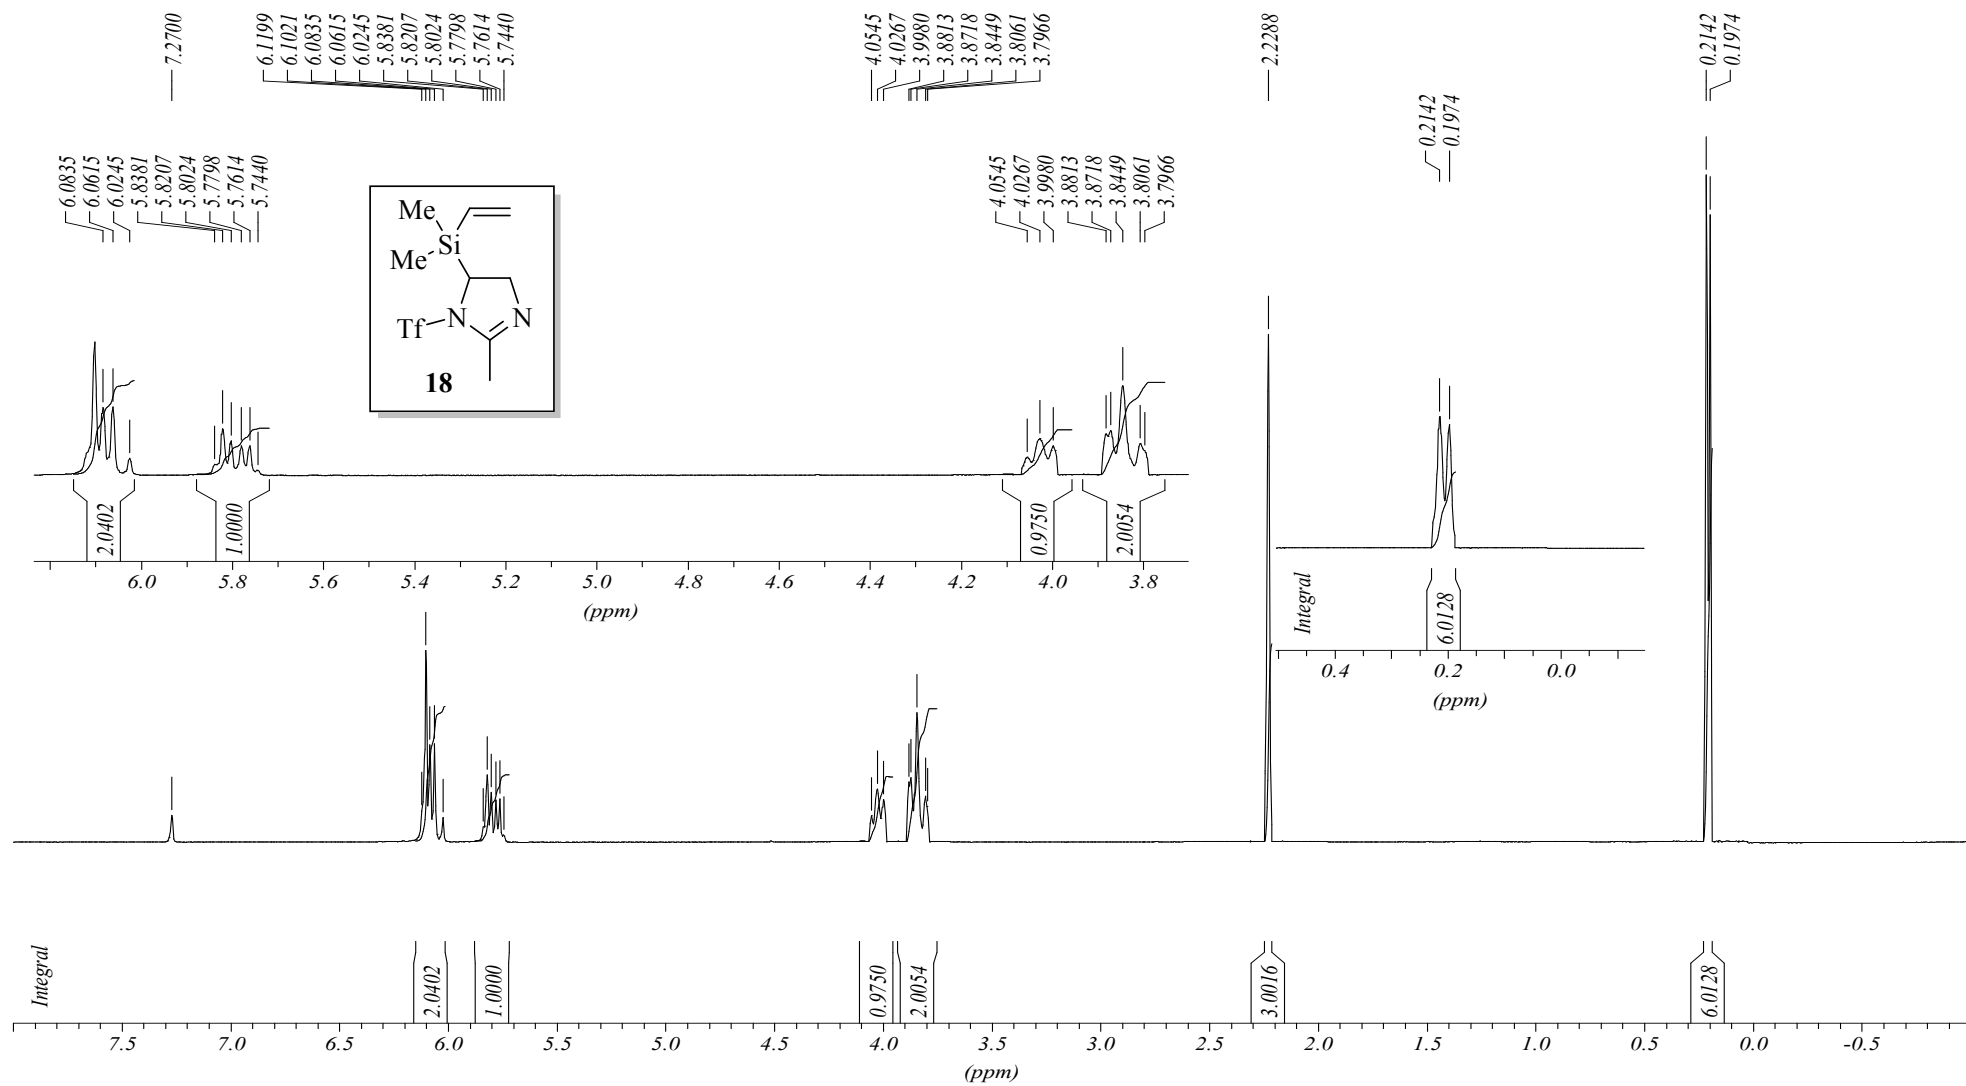

Figure S53.  $^{13}\text{C}$  NMR spectrum of compound **18**

5-(Dimethyl(vinyl)silyl)-2-methyl-1-((trifluoromethyl)sulfonyl)-4,5-dihydro-1H-imidazole, **18** (R = Me).

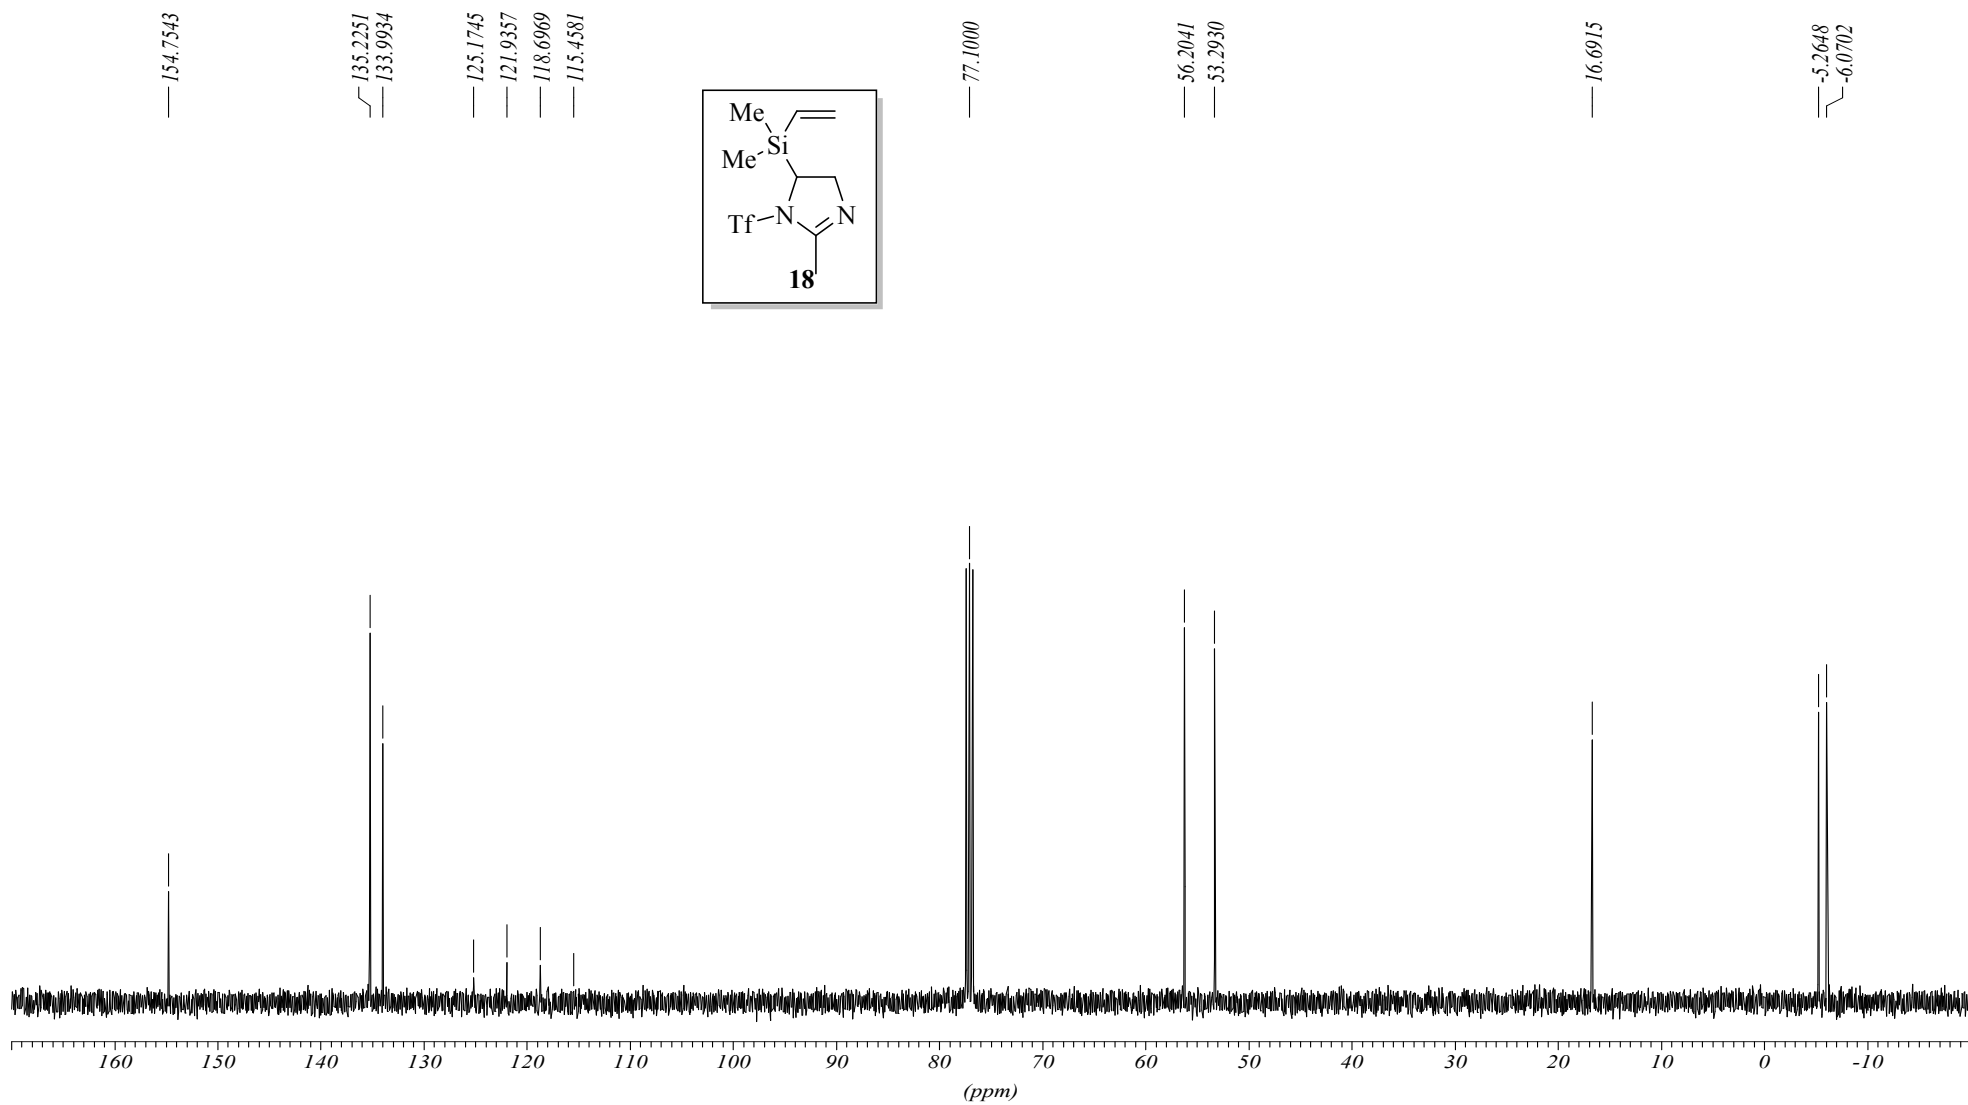

Figure S54. <sup>1</sup>H NMR spectrum of compound **18**

*5-(Diphenyl(vinyl)silyl)-2-methyl-1-(trifluoromethylsulfonyl)-4,5-dihydro-1H-imidazole, 18* (R = Ph).

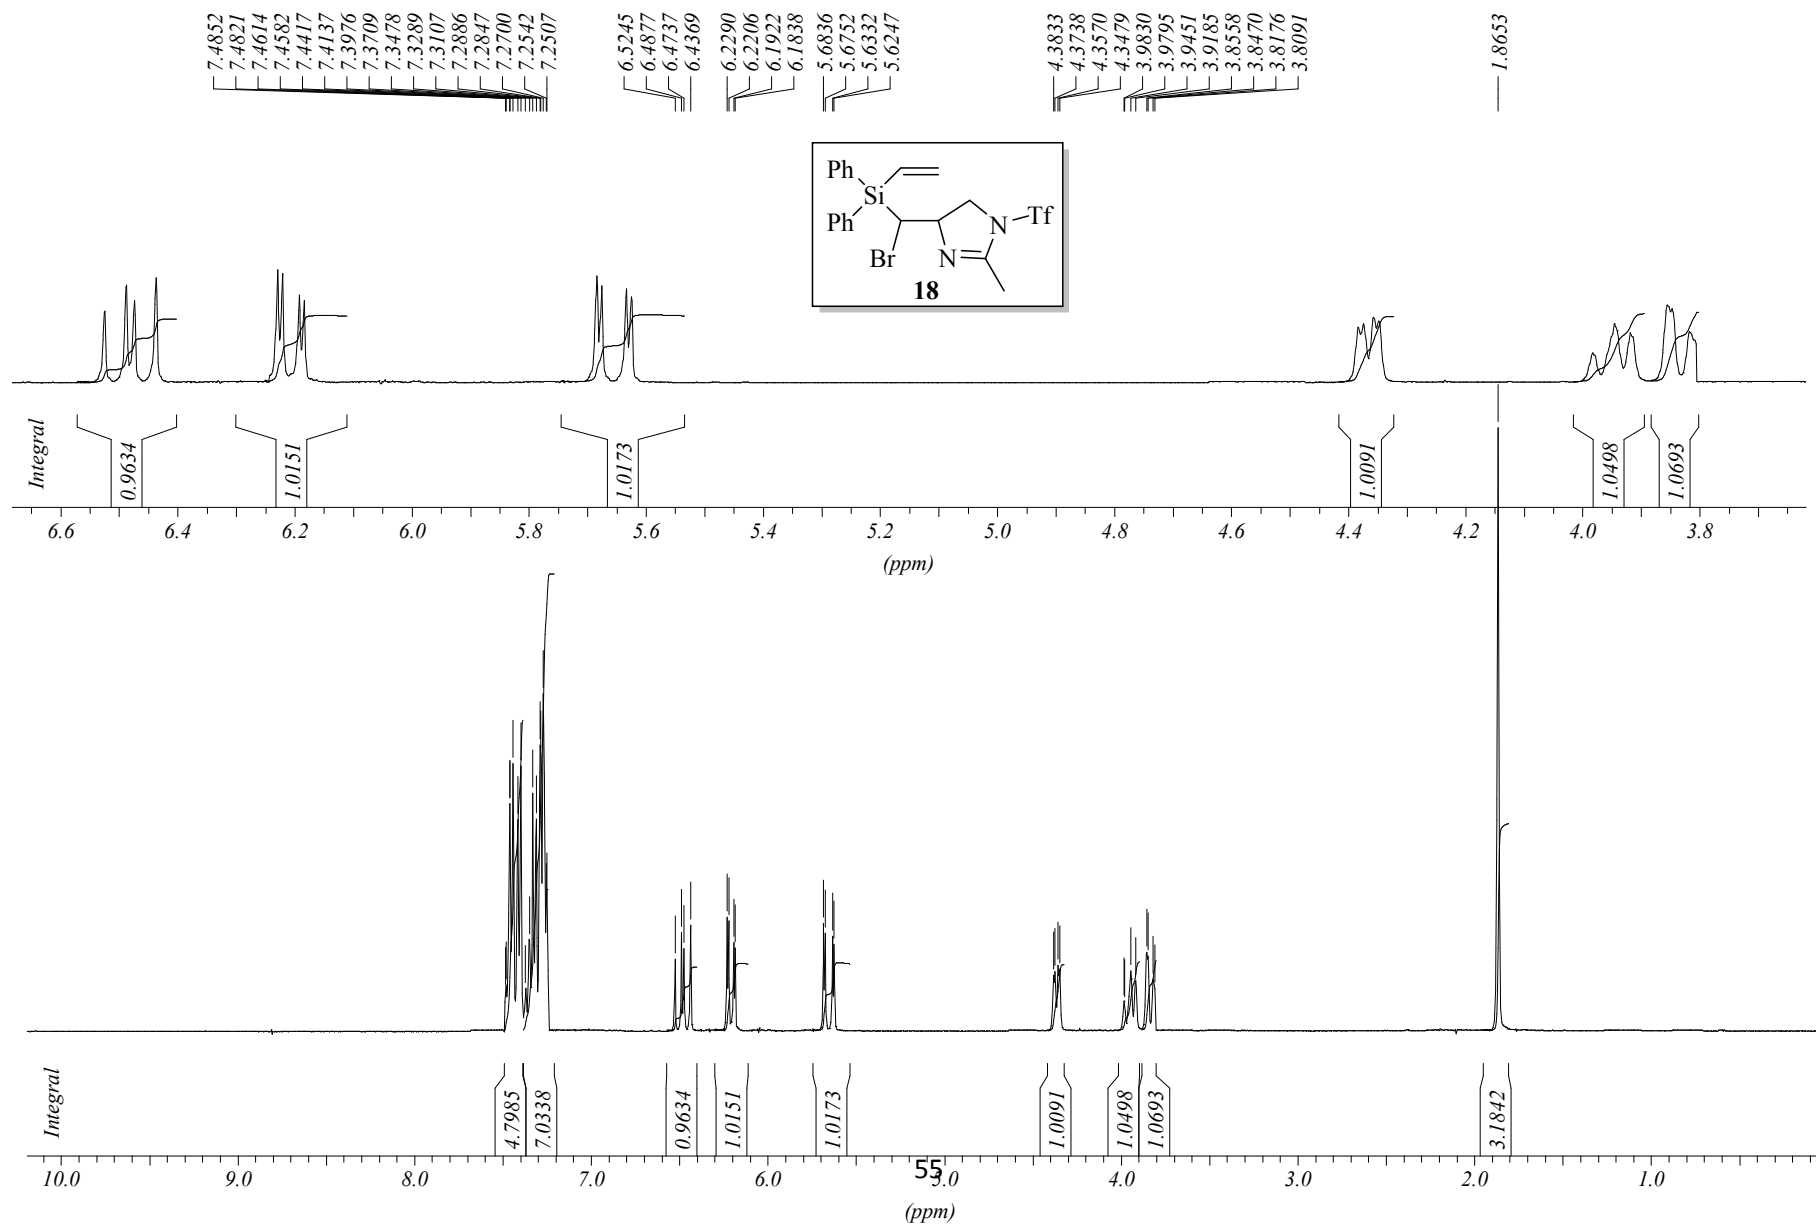

Figure S55.  $^{13}\text{C}$  NMR spectrum of compound **18**

*5-(Diphenyl(vinyl)silyl)-2-methyl-1-(trifluoromethylsulfonyl)-4,5-dihydro-1H-imidazole, 18* (R = Ph).

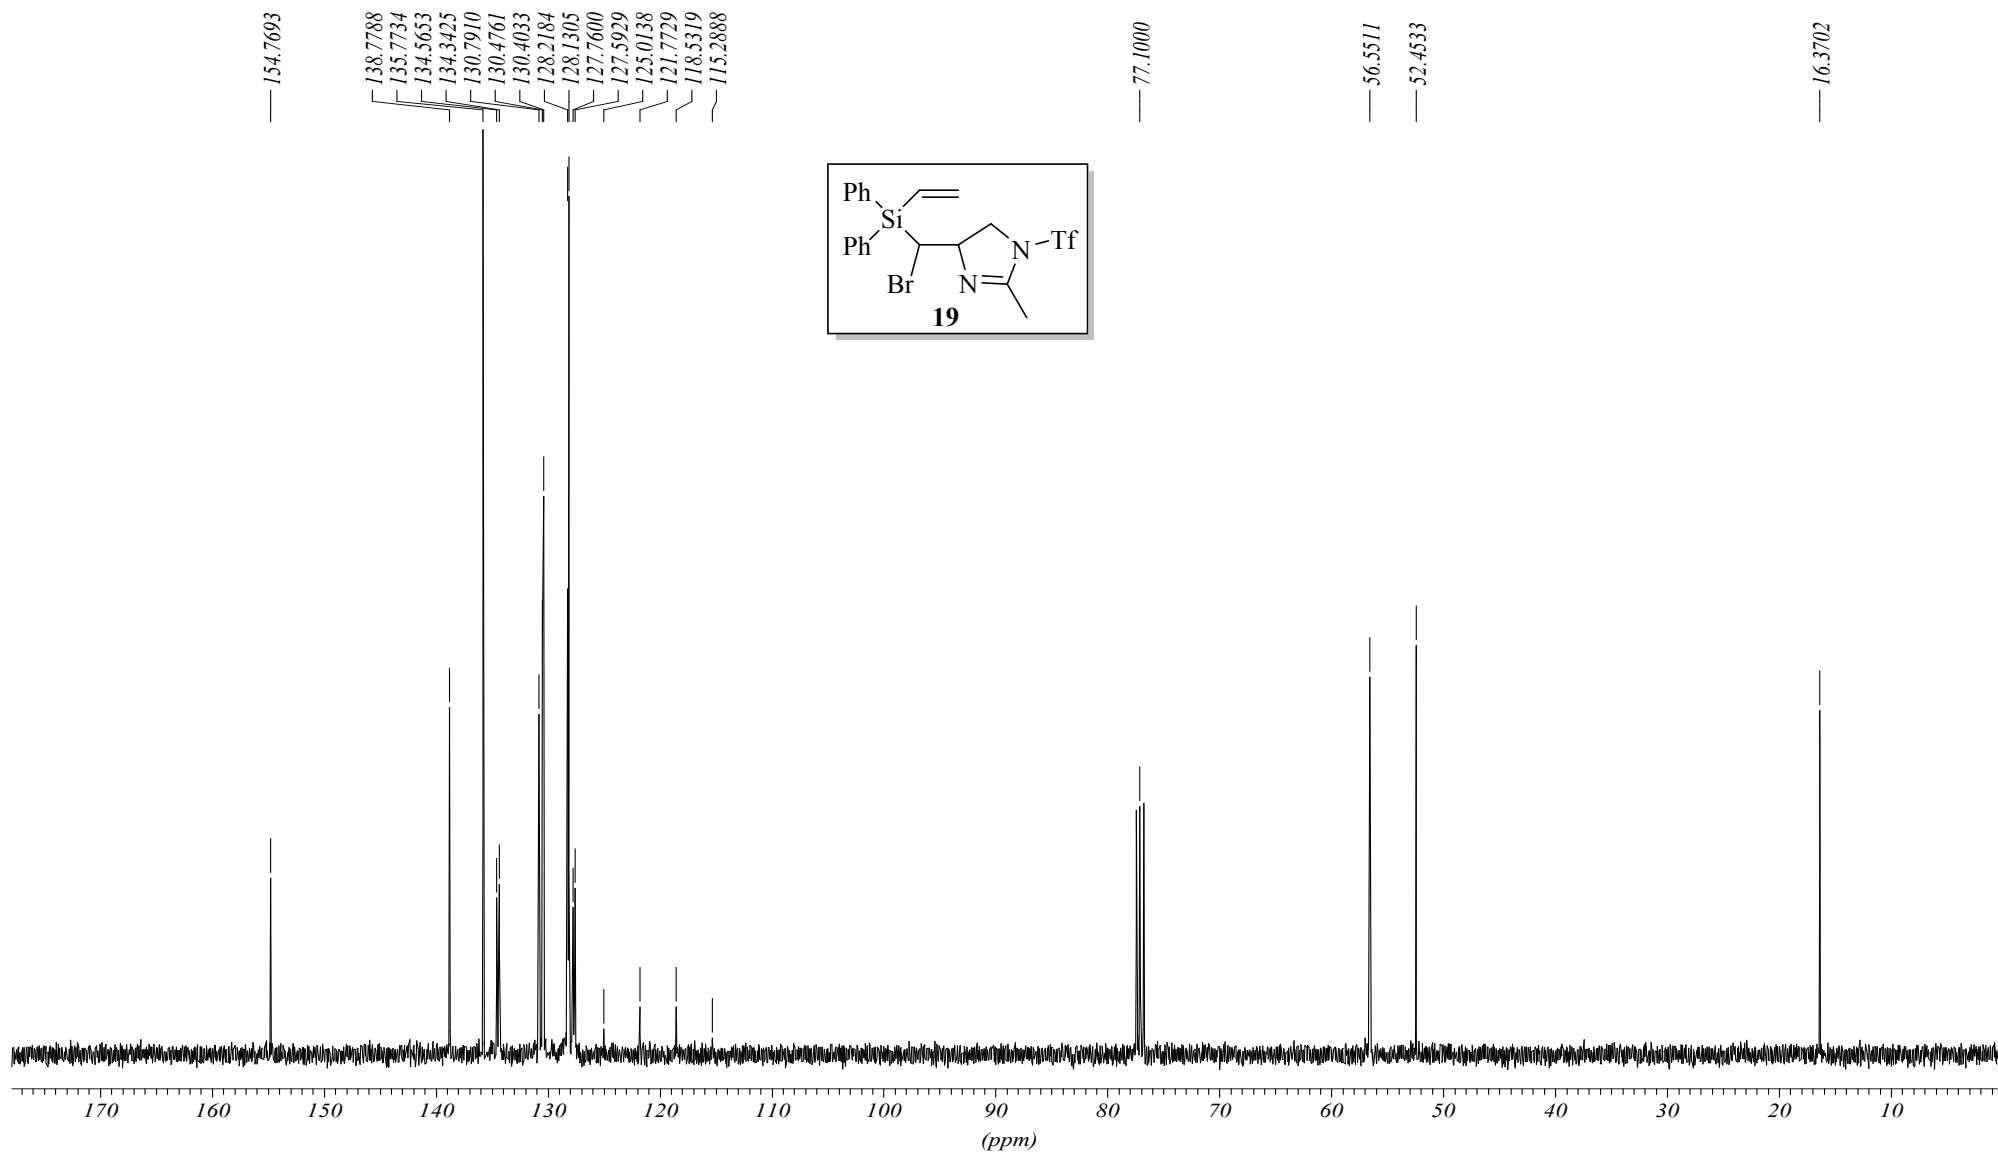



Figure S56.  $^{13}\text{C}$  ( $J$ -mod) NMR spectrum of compound **18**

*5-(Diphenyl(vinyl)silyl)-2-methyl-1-(trifluoromethylsulfonyl)-4,5-dihydro-1H-imidazole*, **18** (R = Ph).

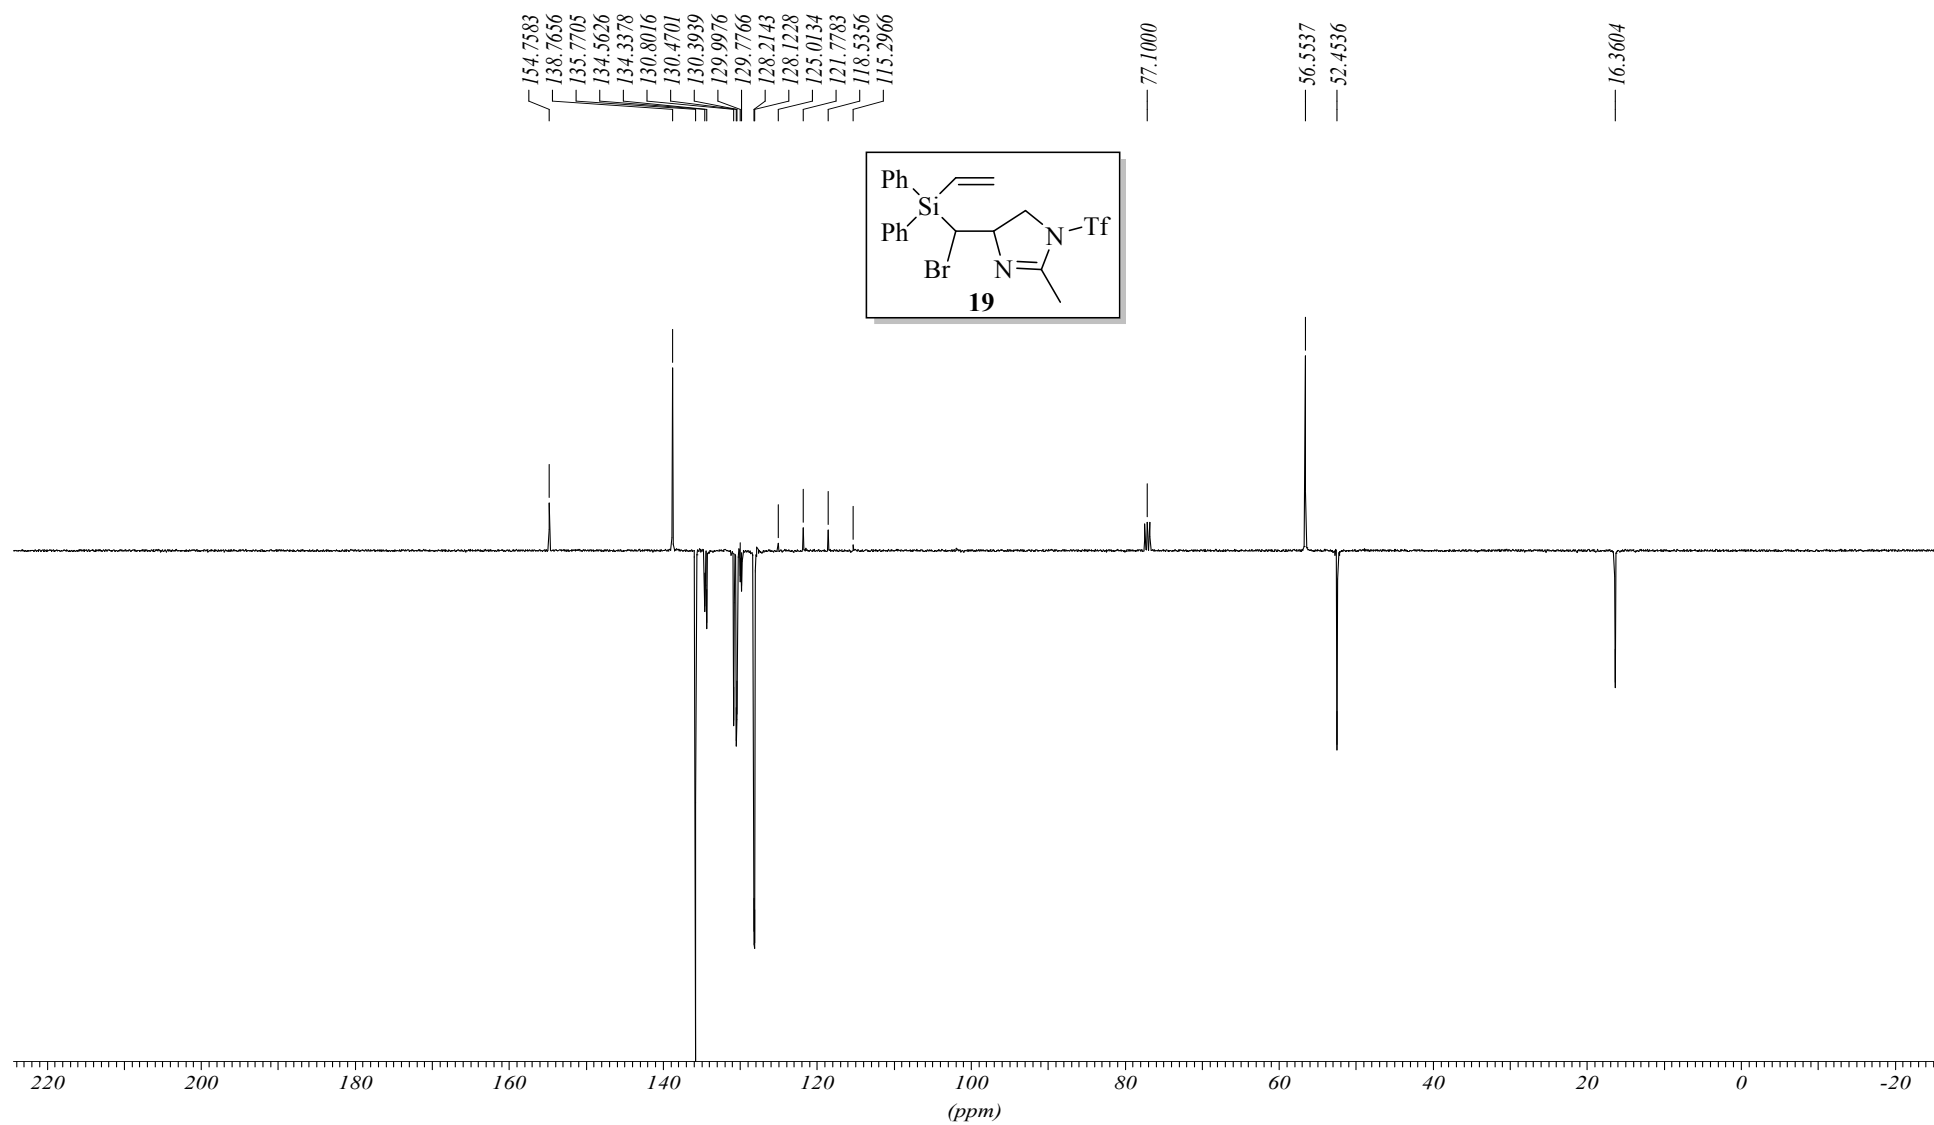

Figure S57. <sup>1</sup>H NMR spectrum of compound **19**

*2,2,4,4,6,6,8,8*-octaphenyl-*1,3,5,7,2,4,6,8*-tetraoxatetrasilocane, **19**

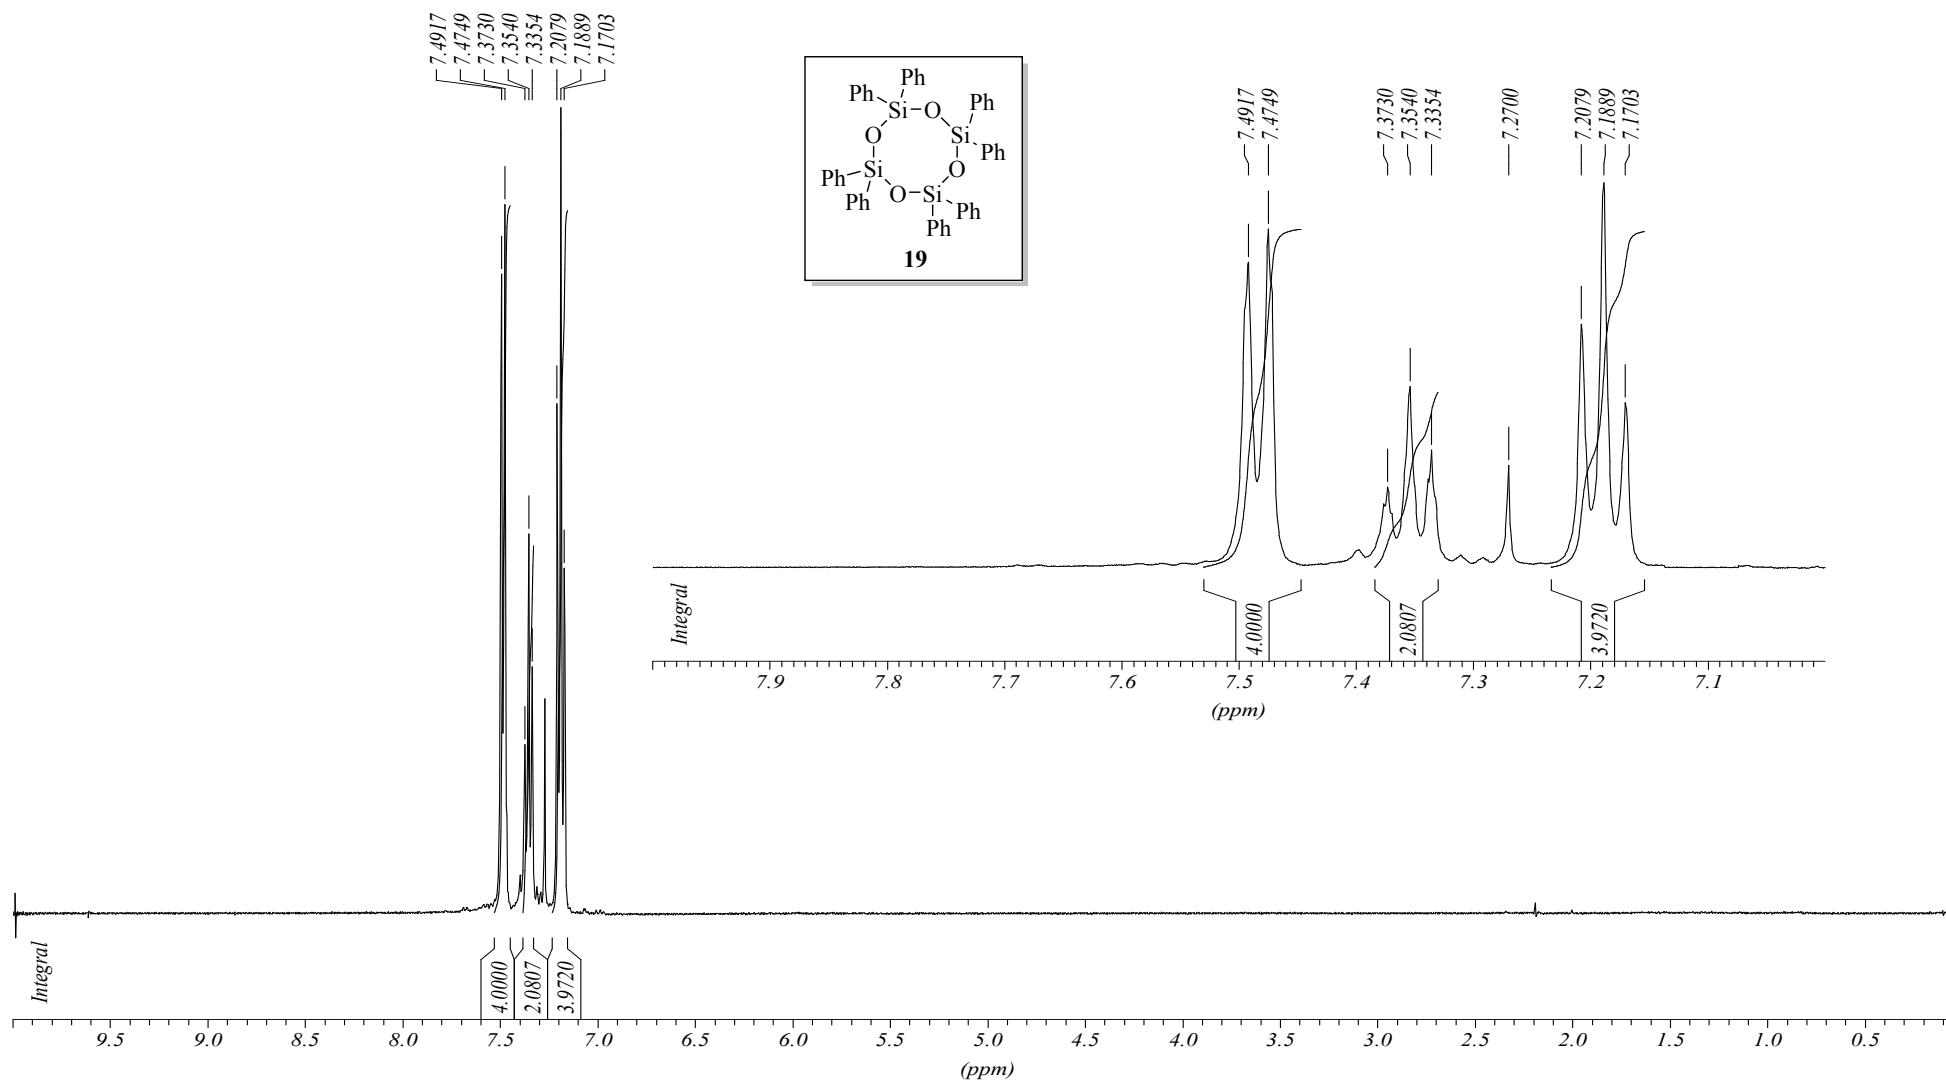

Figure S58.  $^{13}\text{C}$  NMR spectrum of compound **19**

*2,2,4,4,6,6,8,8*-octaphenyl-1,3,5,7,2,4,6,8-tetraoxatetrasilocane, **19**

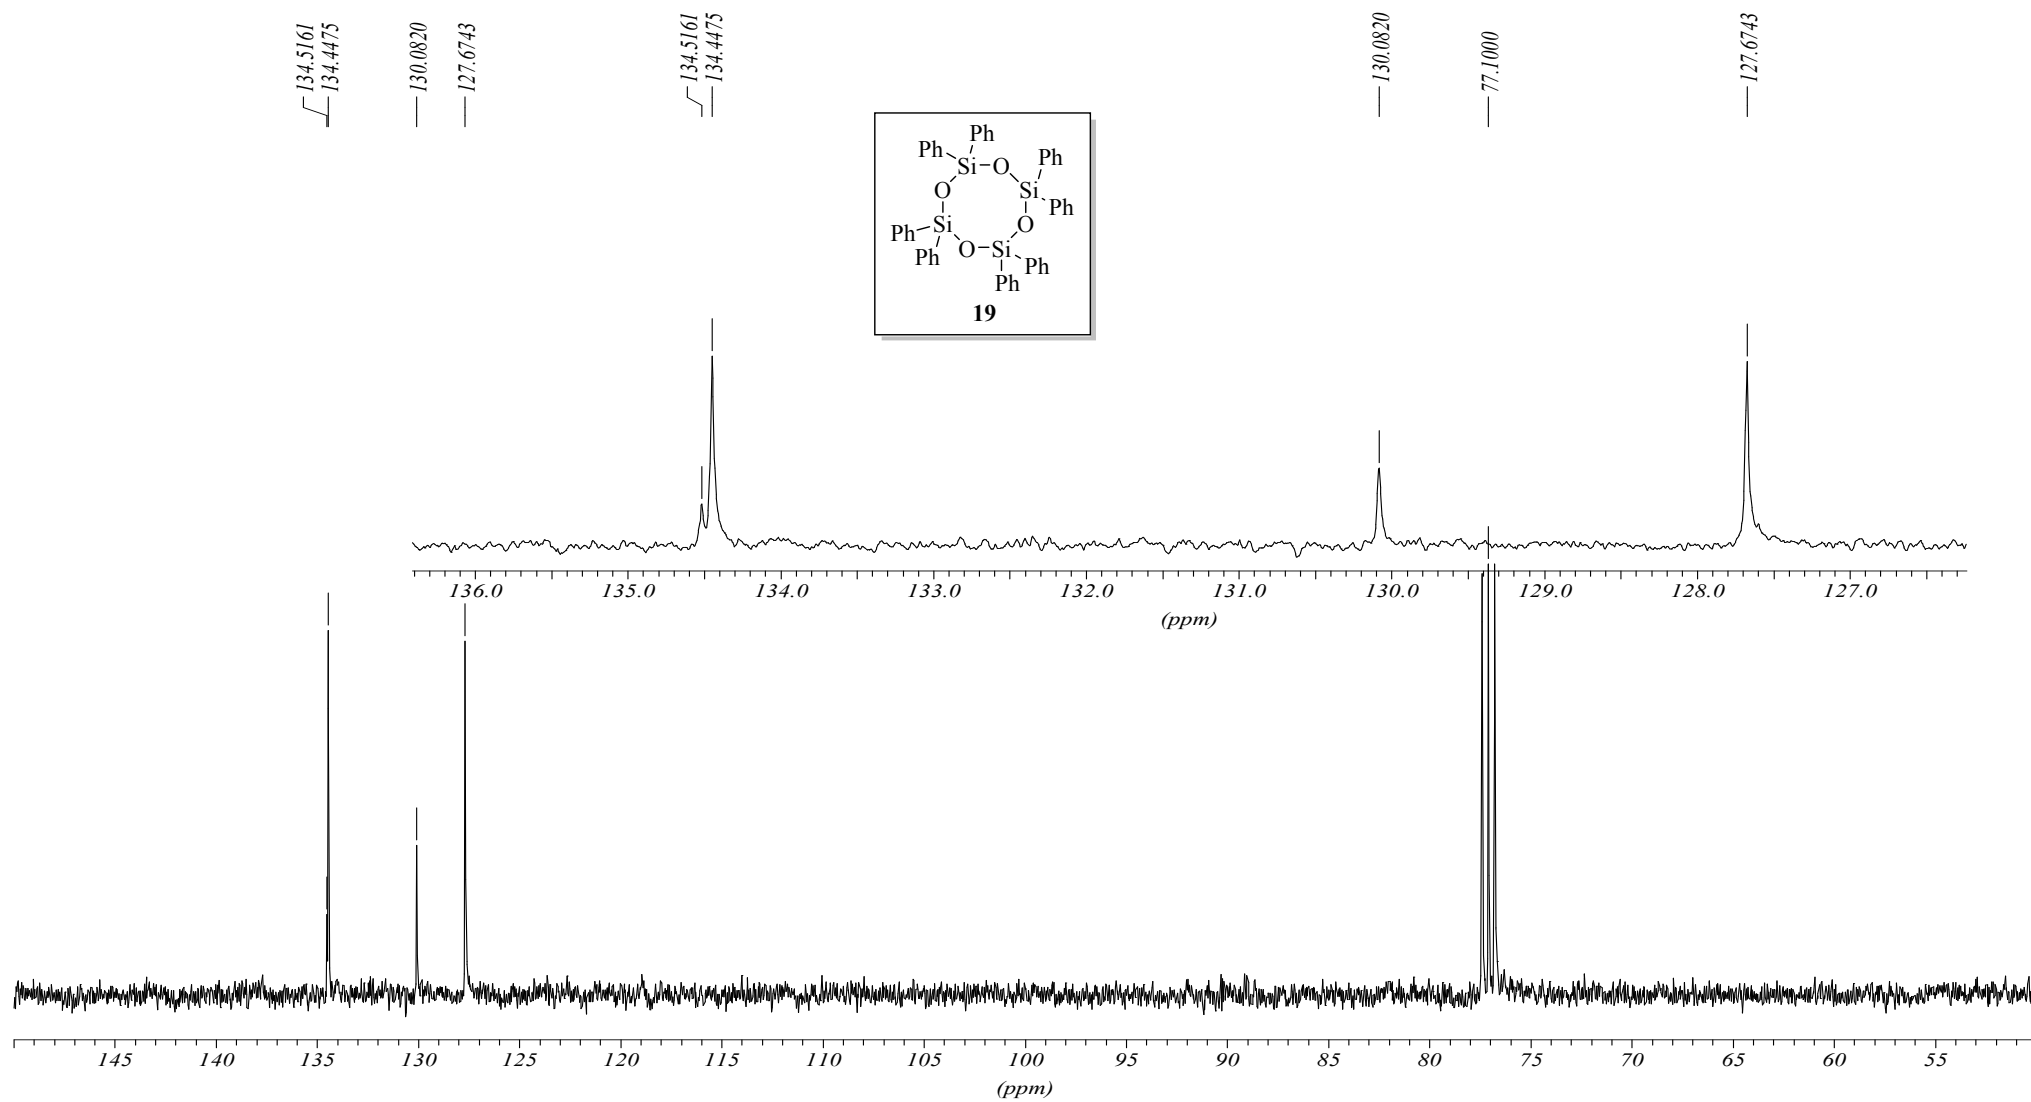

Figure S59. <sup>1</sup>H NMR spectrum of compound **20a**

*2-Methyl-5,5-diphenyl-1-((trifluoromethyl)sulfonyl)-1,4,5,6-tetrahydro-1,3,5-diazasiline, 20a* (R = Ph).

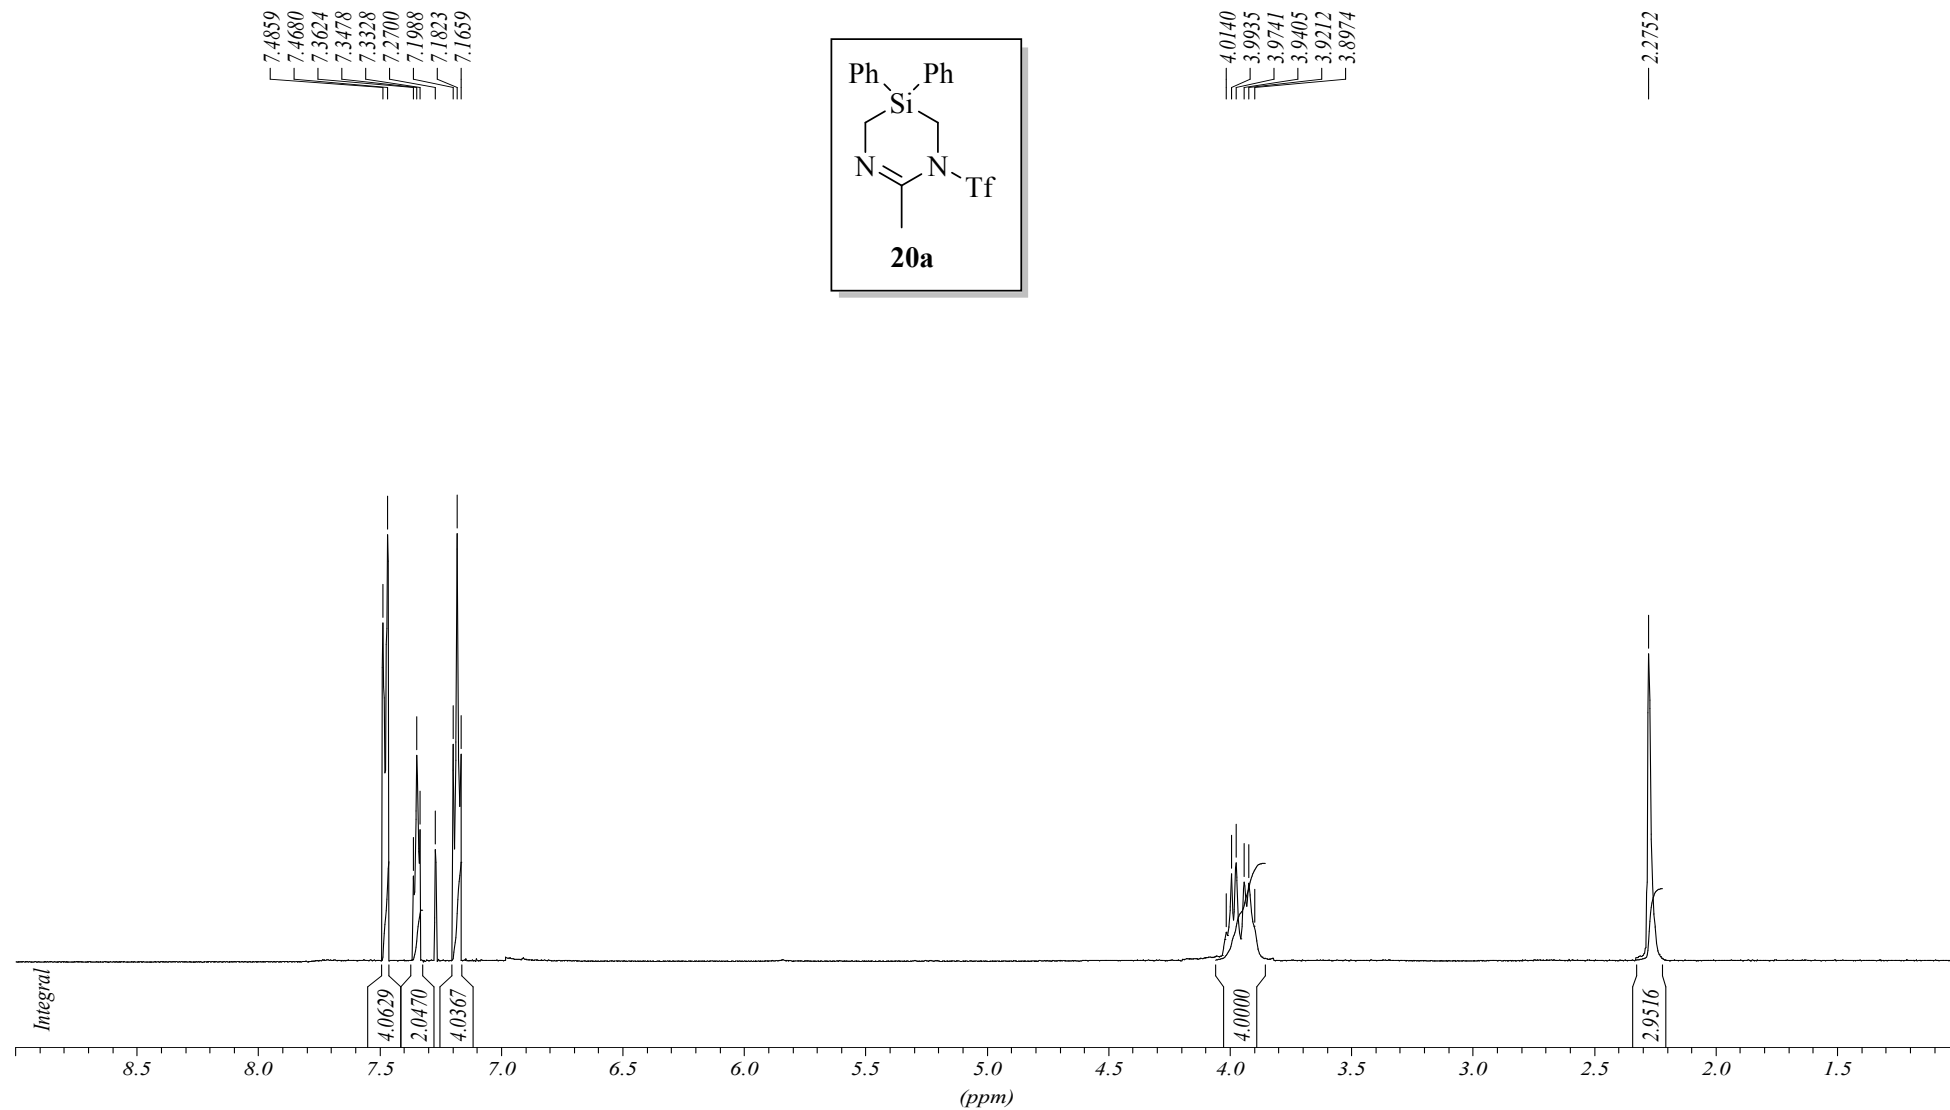

Figure S60.  $^{13}\text{C}$  NMR spectrum of compound **20a**

*2-Methyl-5,5-diphenyl-1-((trifluoromethyl)sulfonyl)-1,4,5,6-tetrahydro-1,3,5-diazasiline, 20a* (R = Ph).

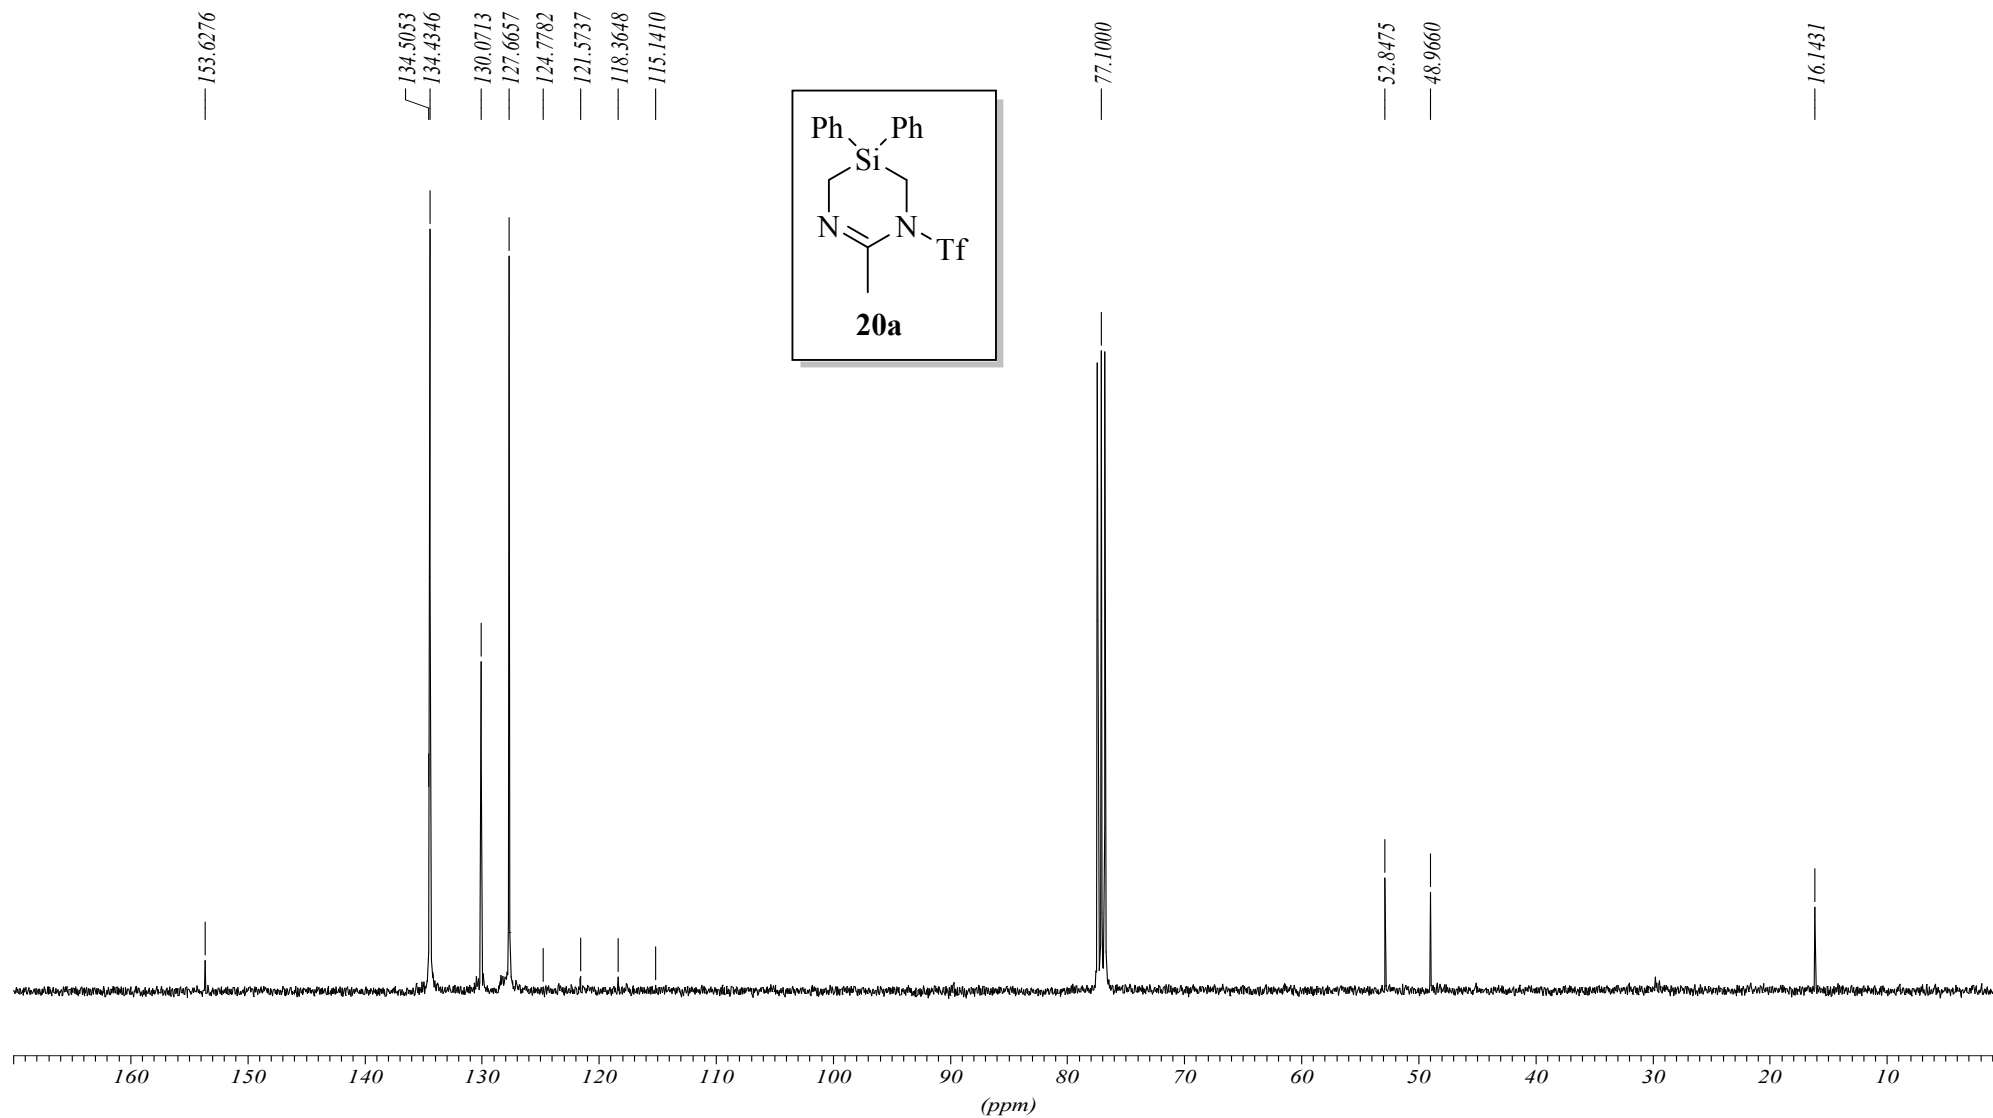

Figure S61. <sup>1</sup>H NMR spectrum of compound **20d**

*2-Methyl-1-((4-nitrophenyl)sulfonyl)-5,5-diphenyl-1,4,5,6-tetrahydro-1,3,5-diazasiline, 20d* (R = Ph).

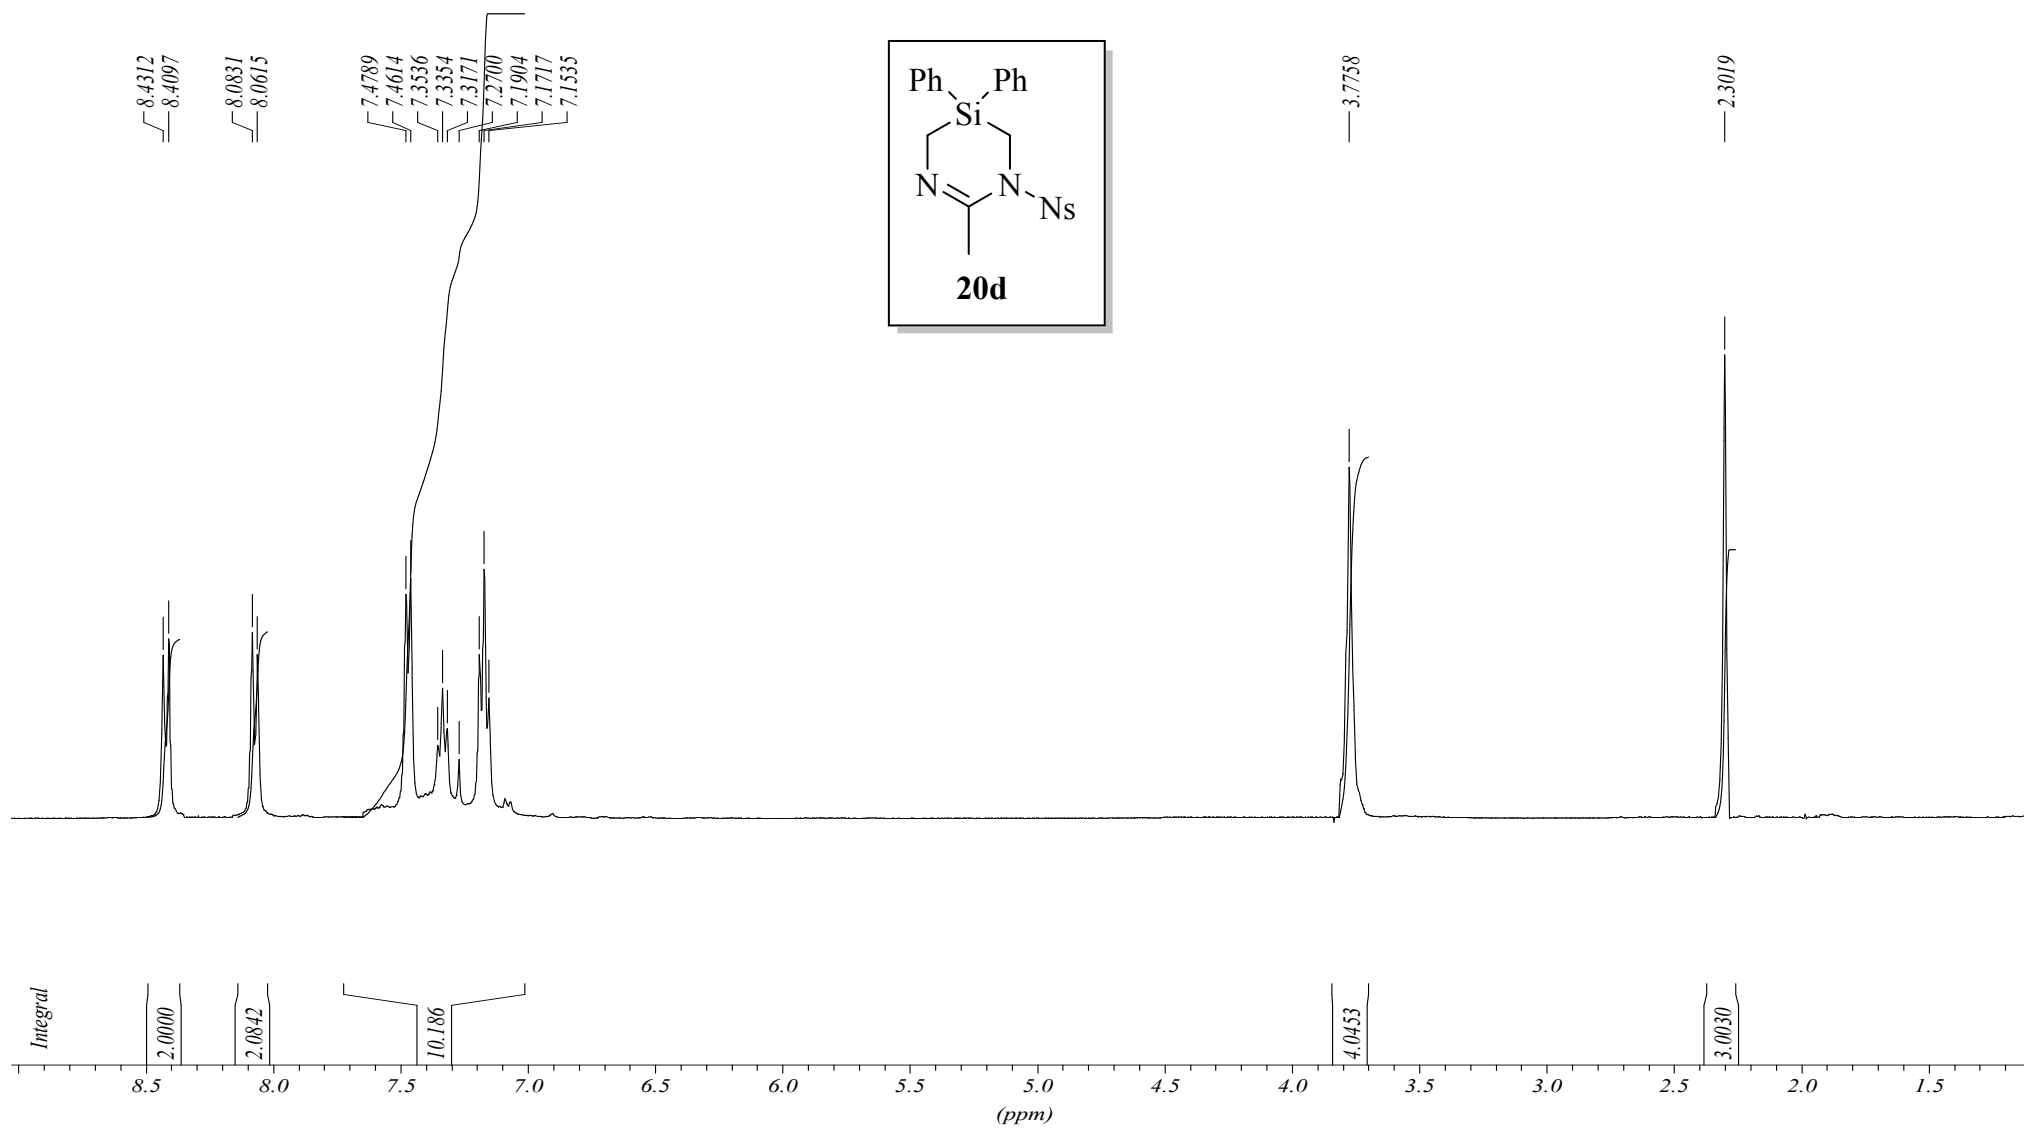

Figure S62.  $^{13}\text{C}$  NMR spectrum of compound **20d**

*2-Methyl-1-((4-nitrophenyl)sulfonyl)-5,5-diphenyl-1,4,5,6-tetrahydro-1,3,5-diazasiline, 20d* (R = Ph).

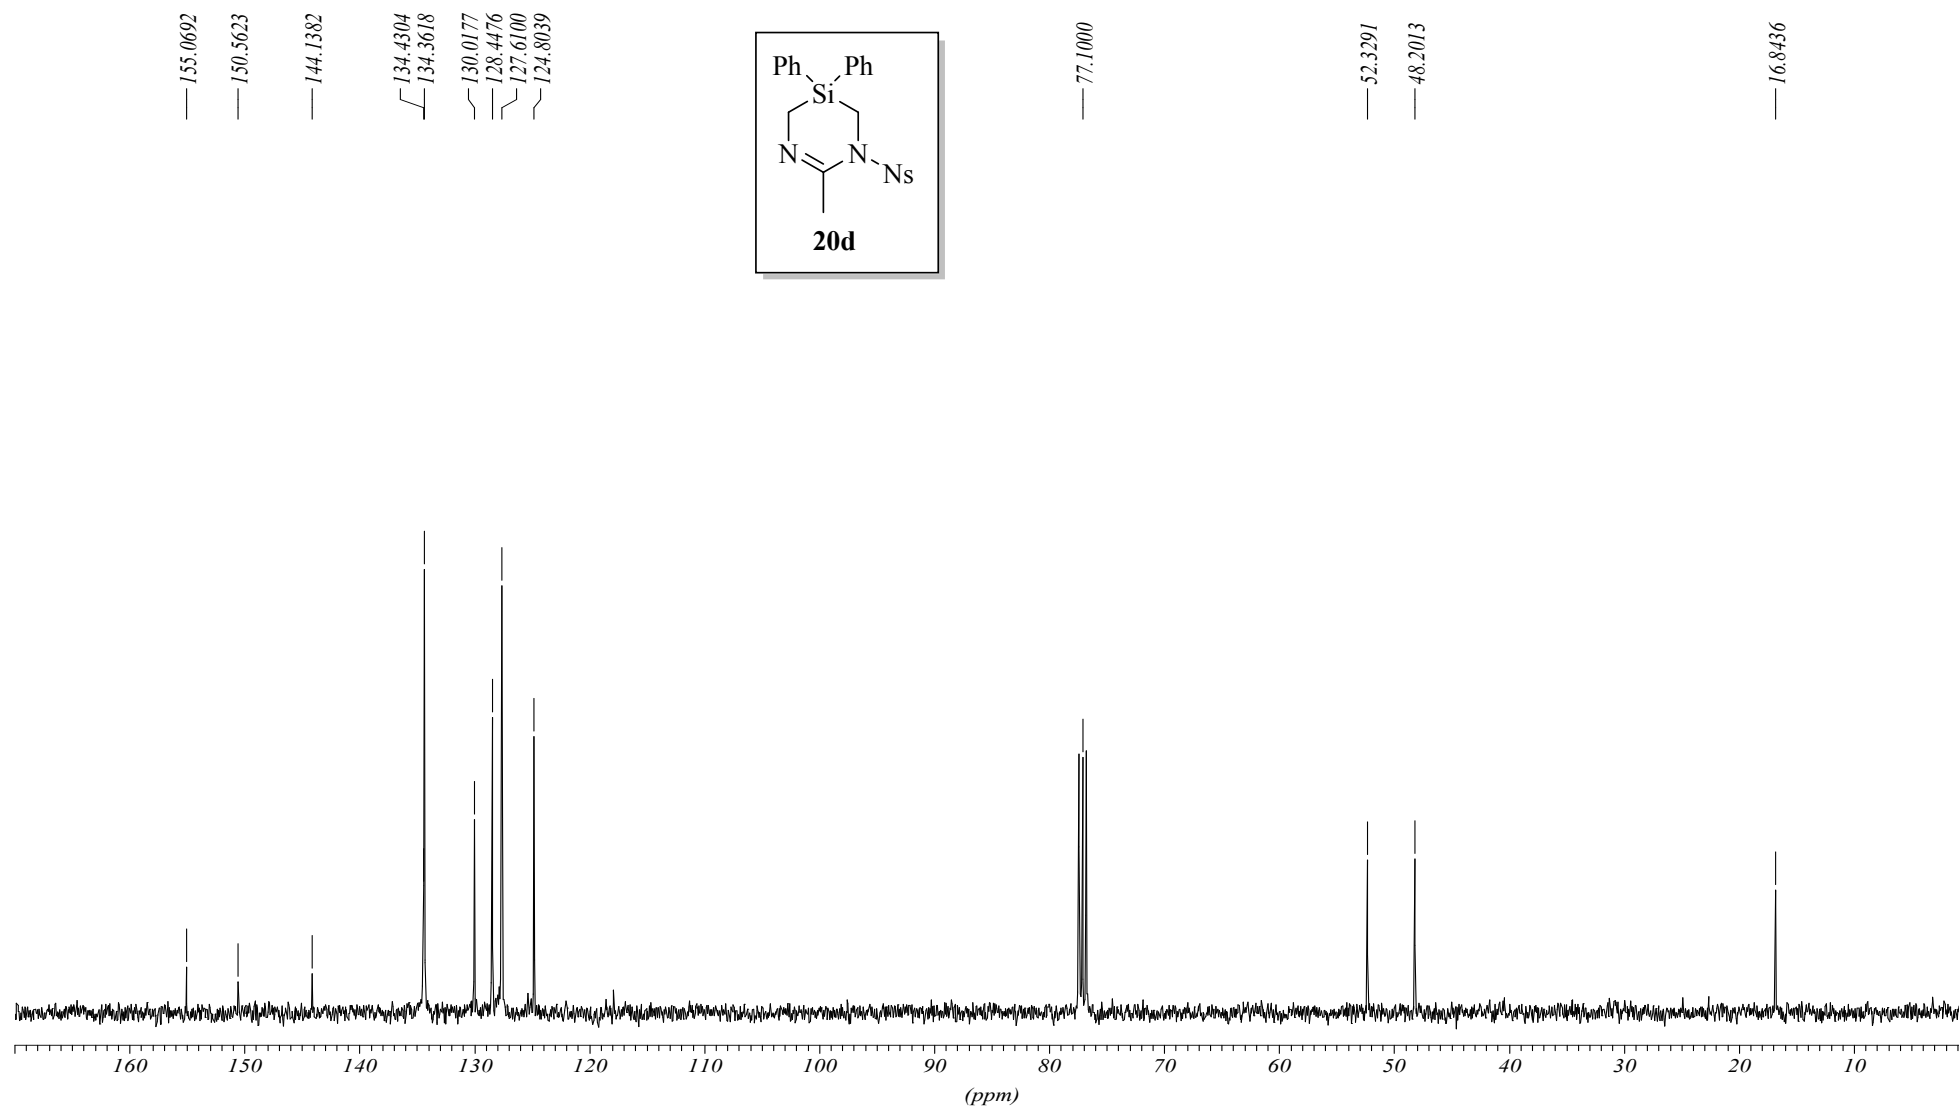

Figure S63.  $\{^{13}\text{C}-^1\text{H}\}$  NMR spectrum of compound **20d**

*2-Methyl-1-((4-nitrophenyl)sulfonyl)-5,5-diphenyl-1,4,5,6-tetrahydro-1,3,5-diazasiline, 20d*

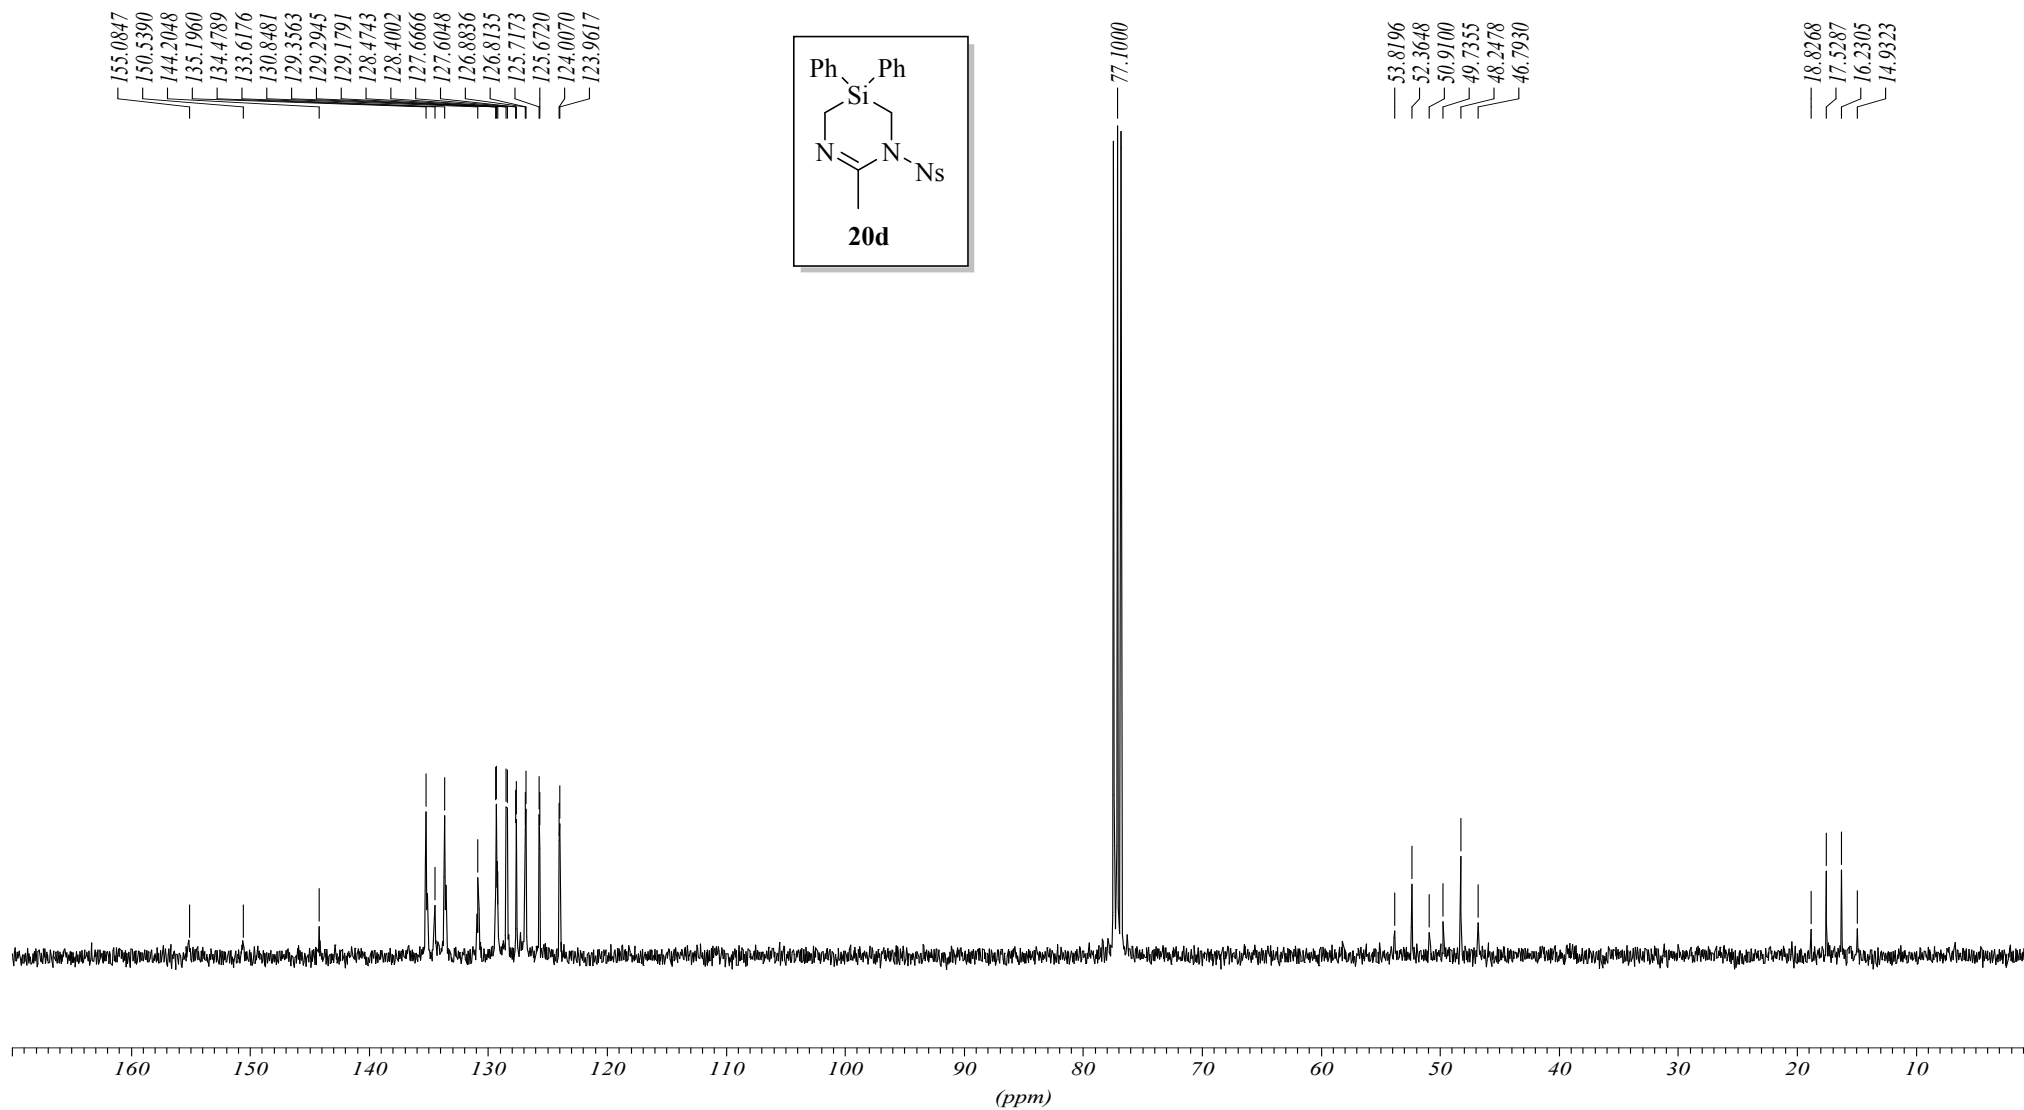



Figure S64.  $^{13}\text{C}$  ( $J$ -mod)NMR spectrum of compound **20d**

*2-Methyl-1-((4-nitrophenyl)sulfonyl)-5,5-diphenyl-1,4,5,6-tetrahydro-1,3,5-diazasiline*, **20d** (R = Ph).

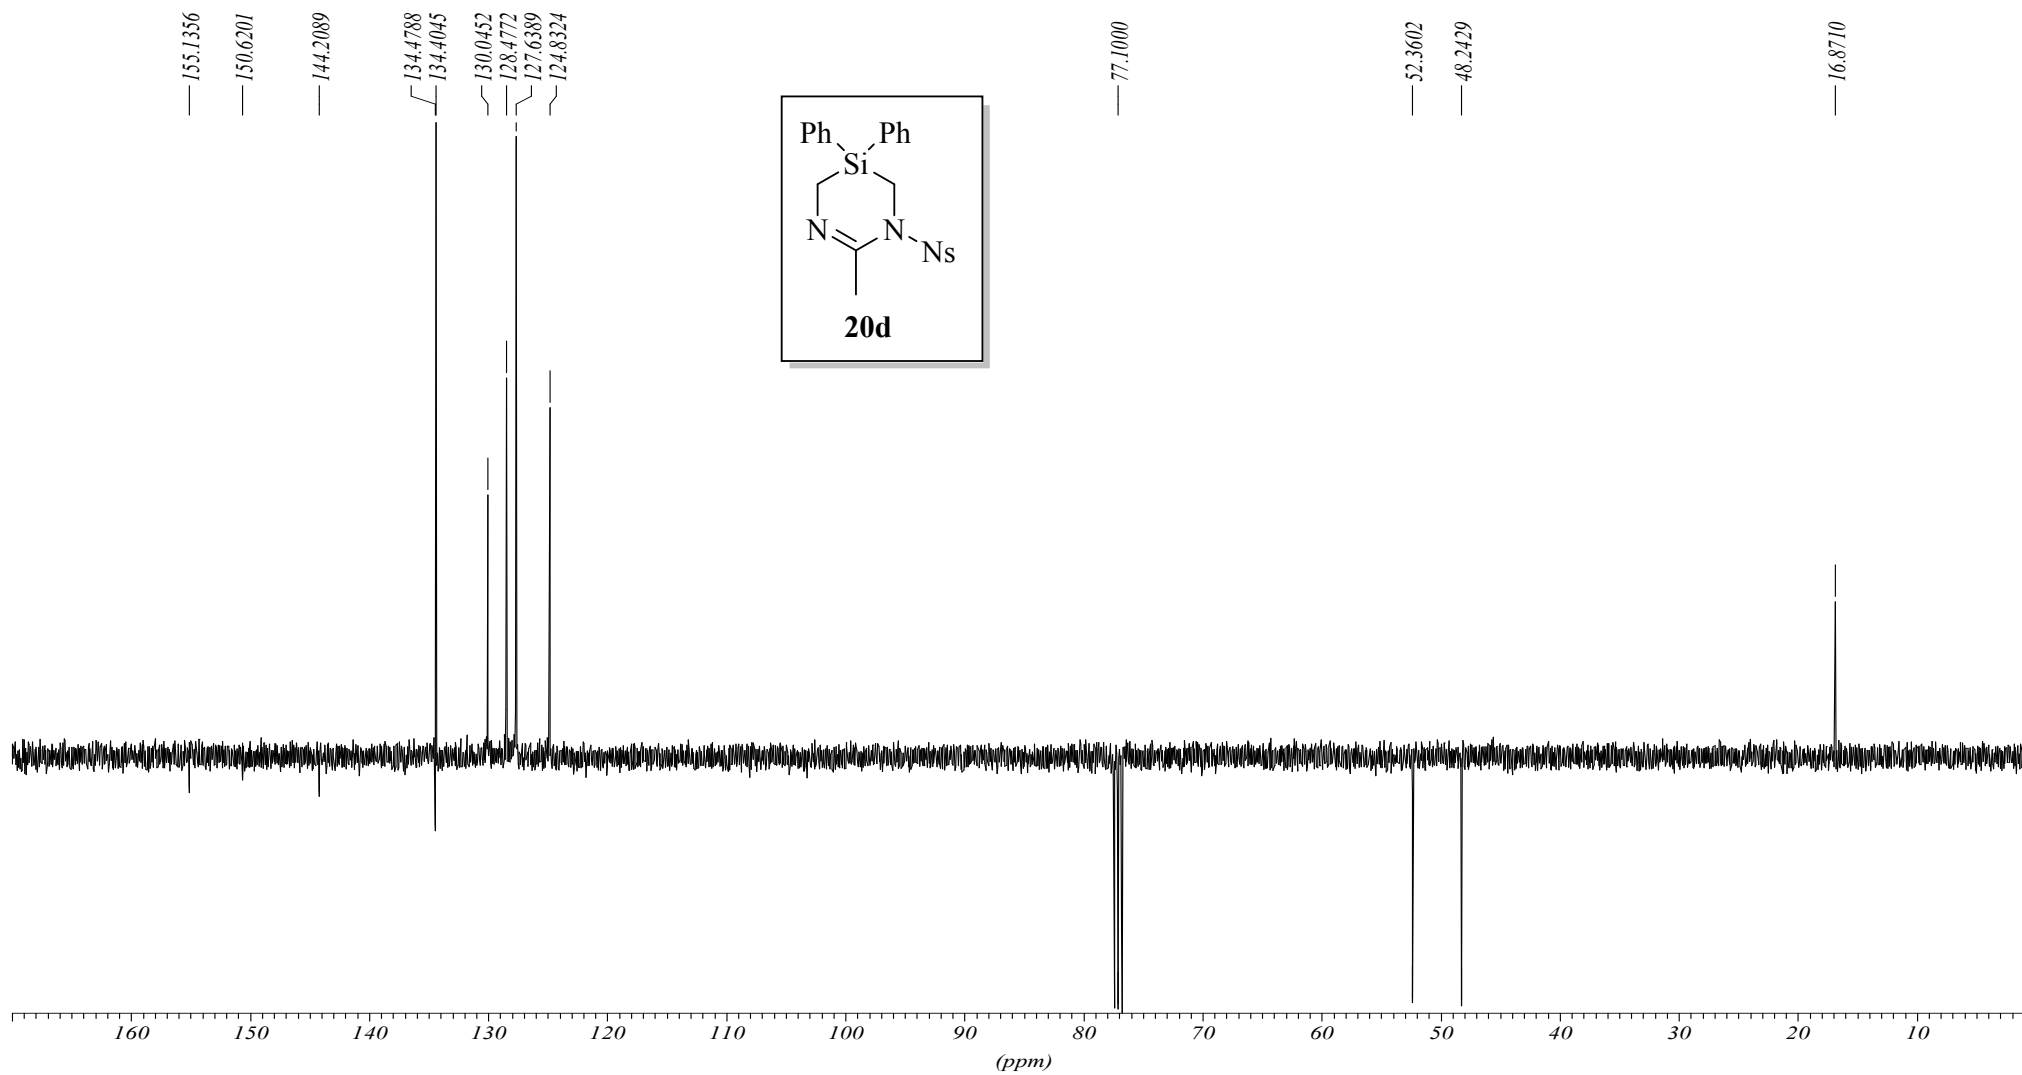

Figure S65. <sup>1</sup>H NMR spectrum of compound **20a**

2,5,5-trimethyl-1-((trifluoromethyl)sulfonyl)-1,4,5,6-tetrahydro-1,3,5-diazasiline, **20a** (R = Me).

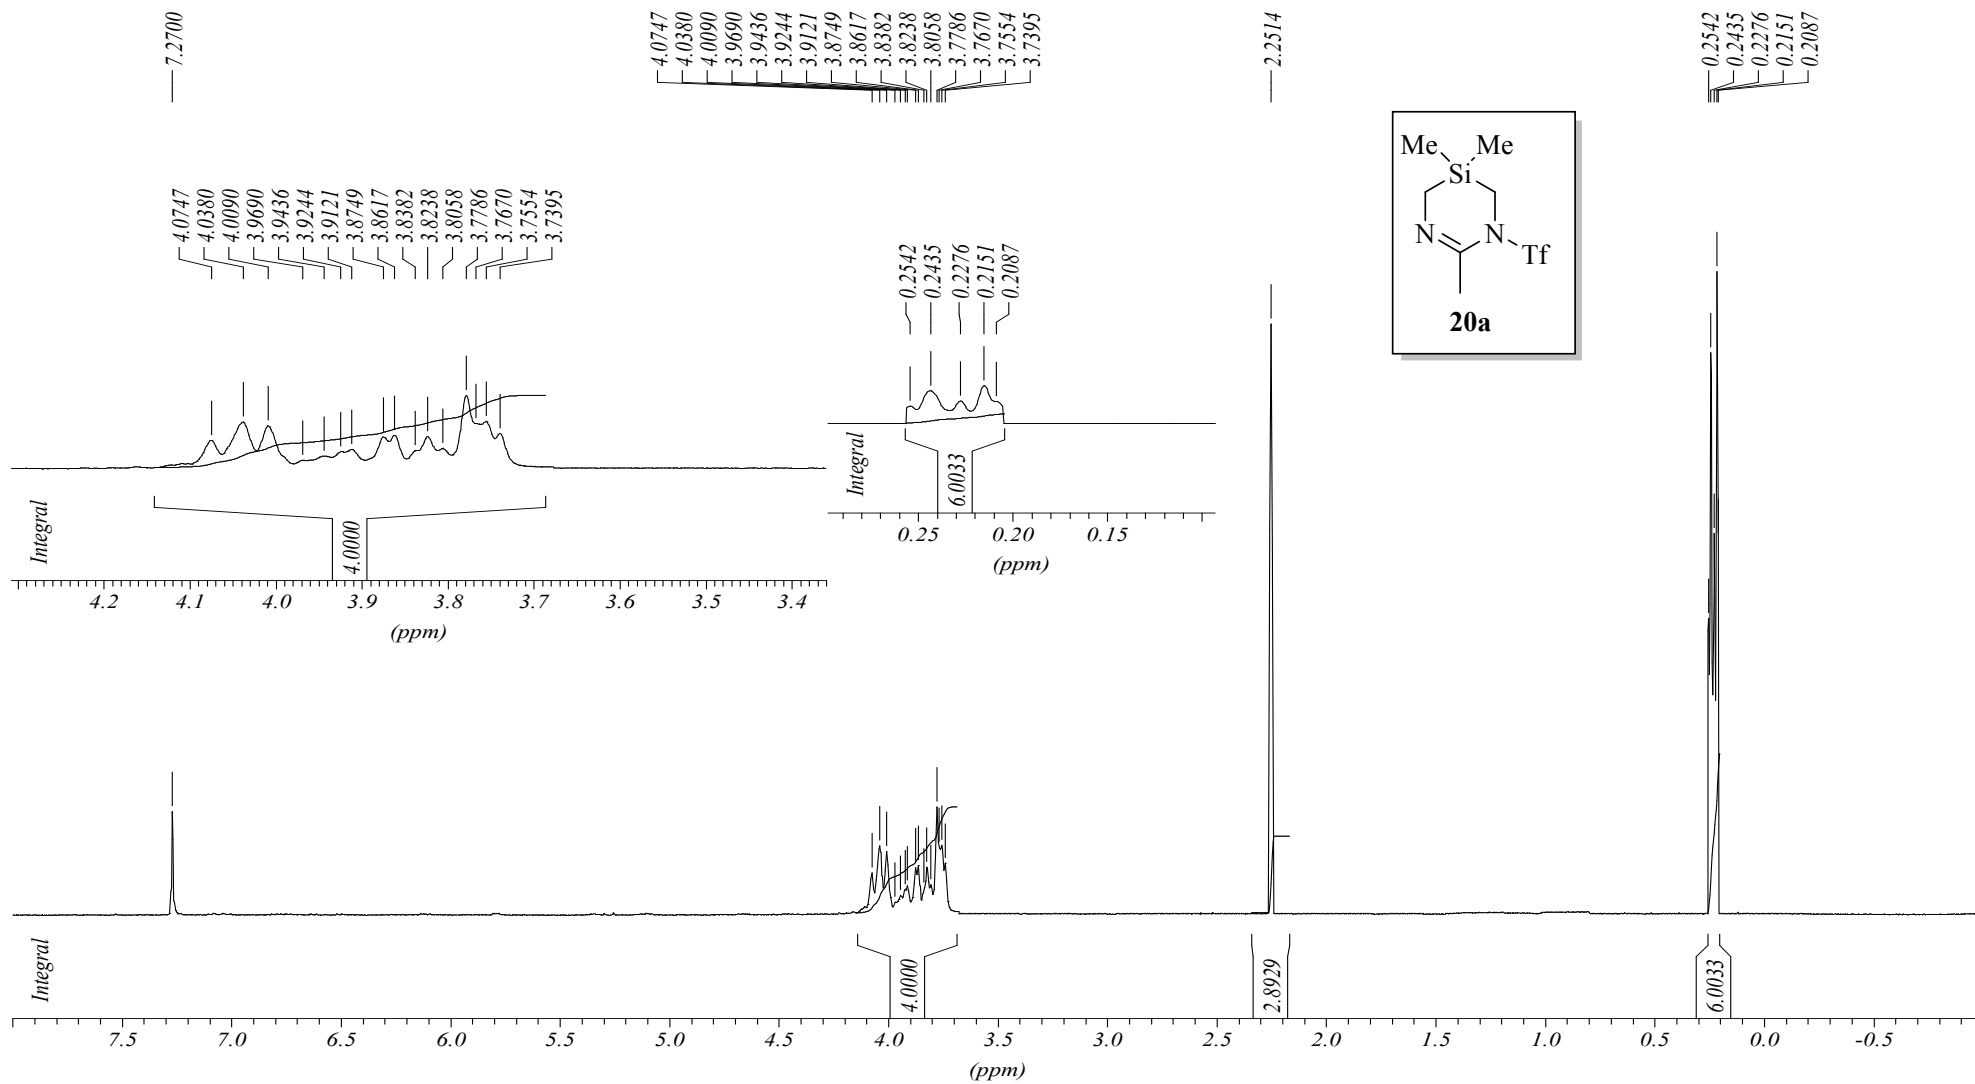

Figure S66.  $^{13}\text{C}$  NMR spectrum of compound **20a**

*2,5,5-Trimethyl-1-((trifluoromethyl)sulfonyl)-1,4,5,6-tetrahydro-1,3,5-diazasiline, 20a* (R = Me).

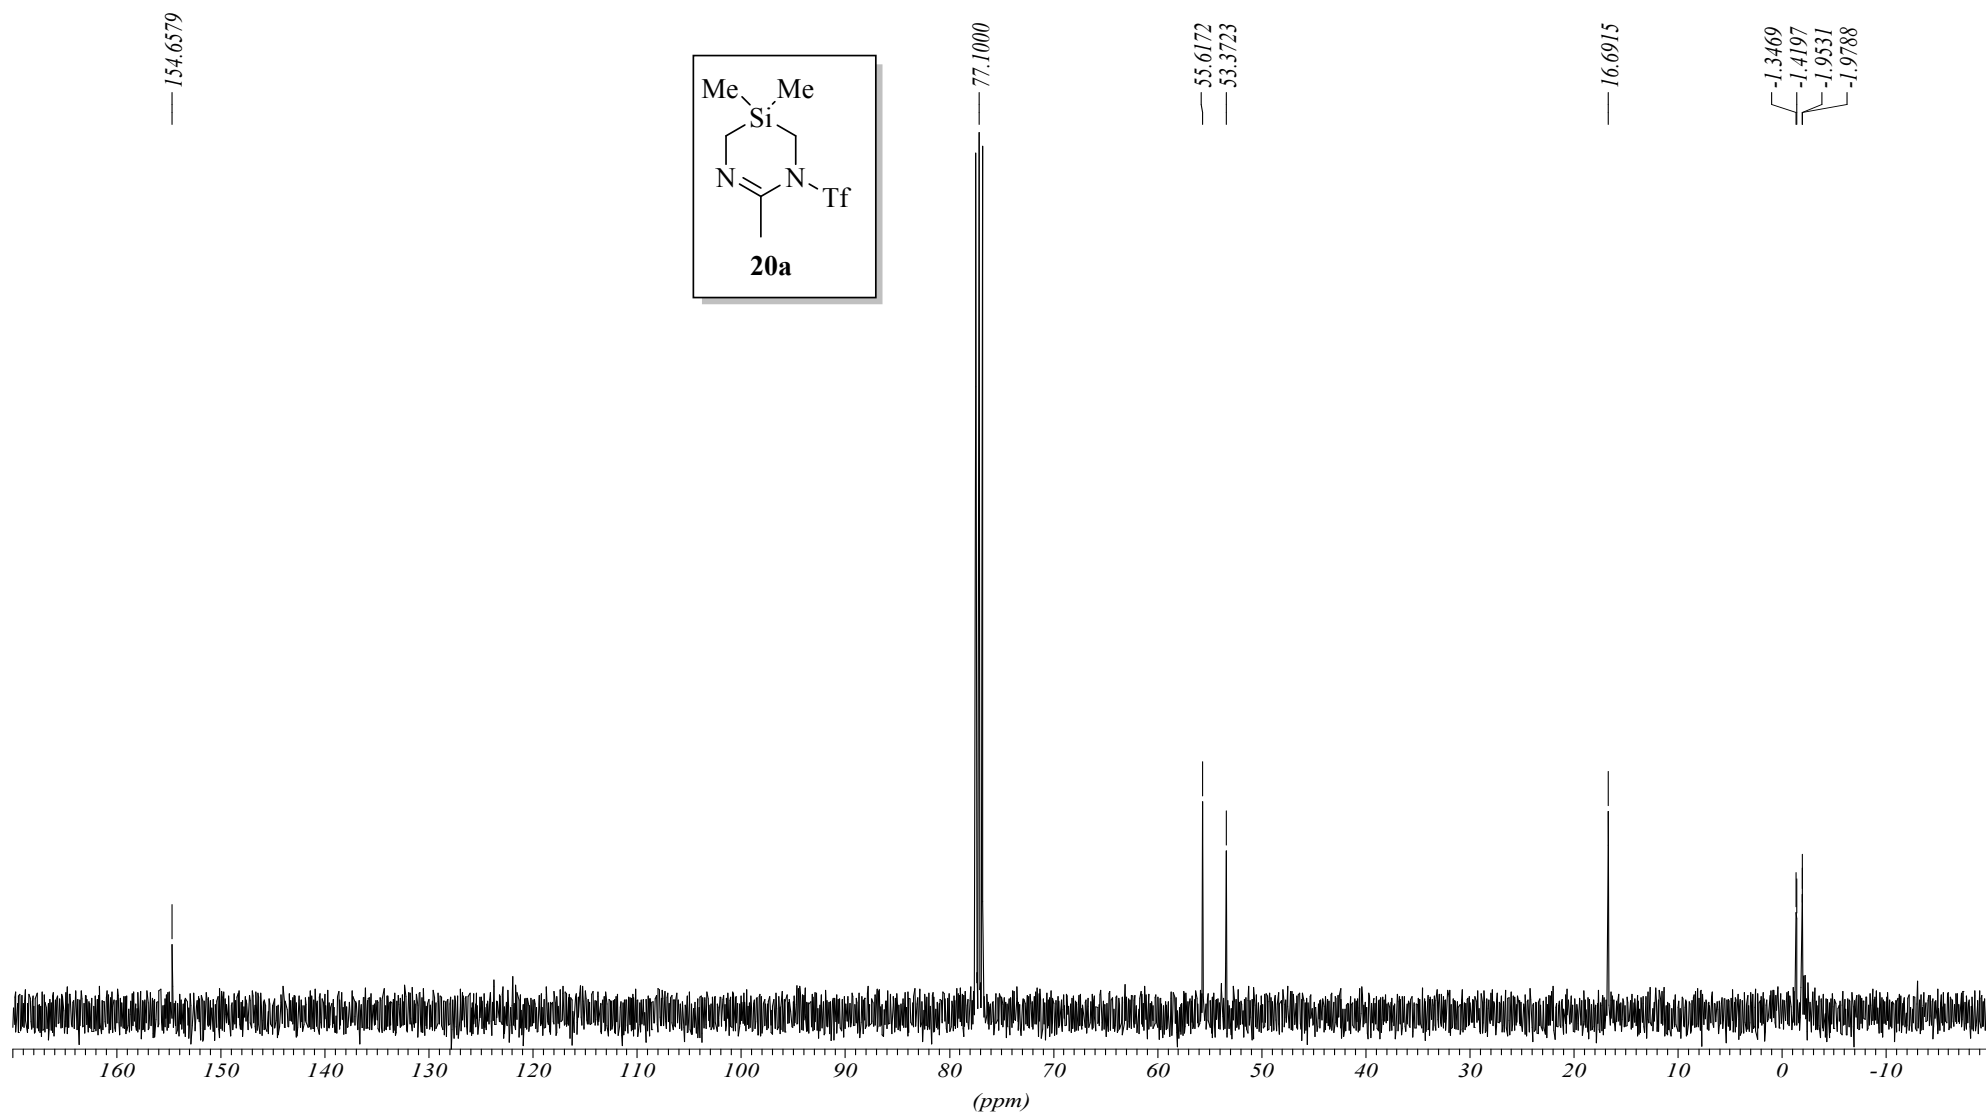

Figure S67. <sup>1</sup>H NMR spectrum of compound **21a**

*3-(Diphenyl(vinyl)silyl)-4-((trifluoromethyl)sulfonyl)-1,4-oxazocane, 21a* (R = Ph).

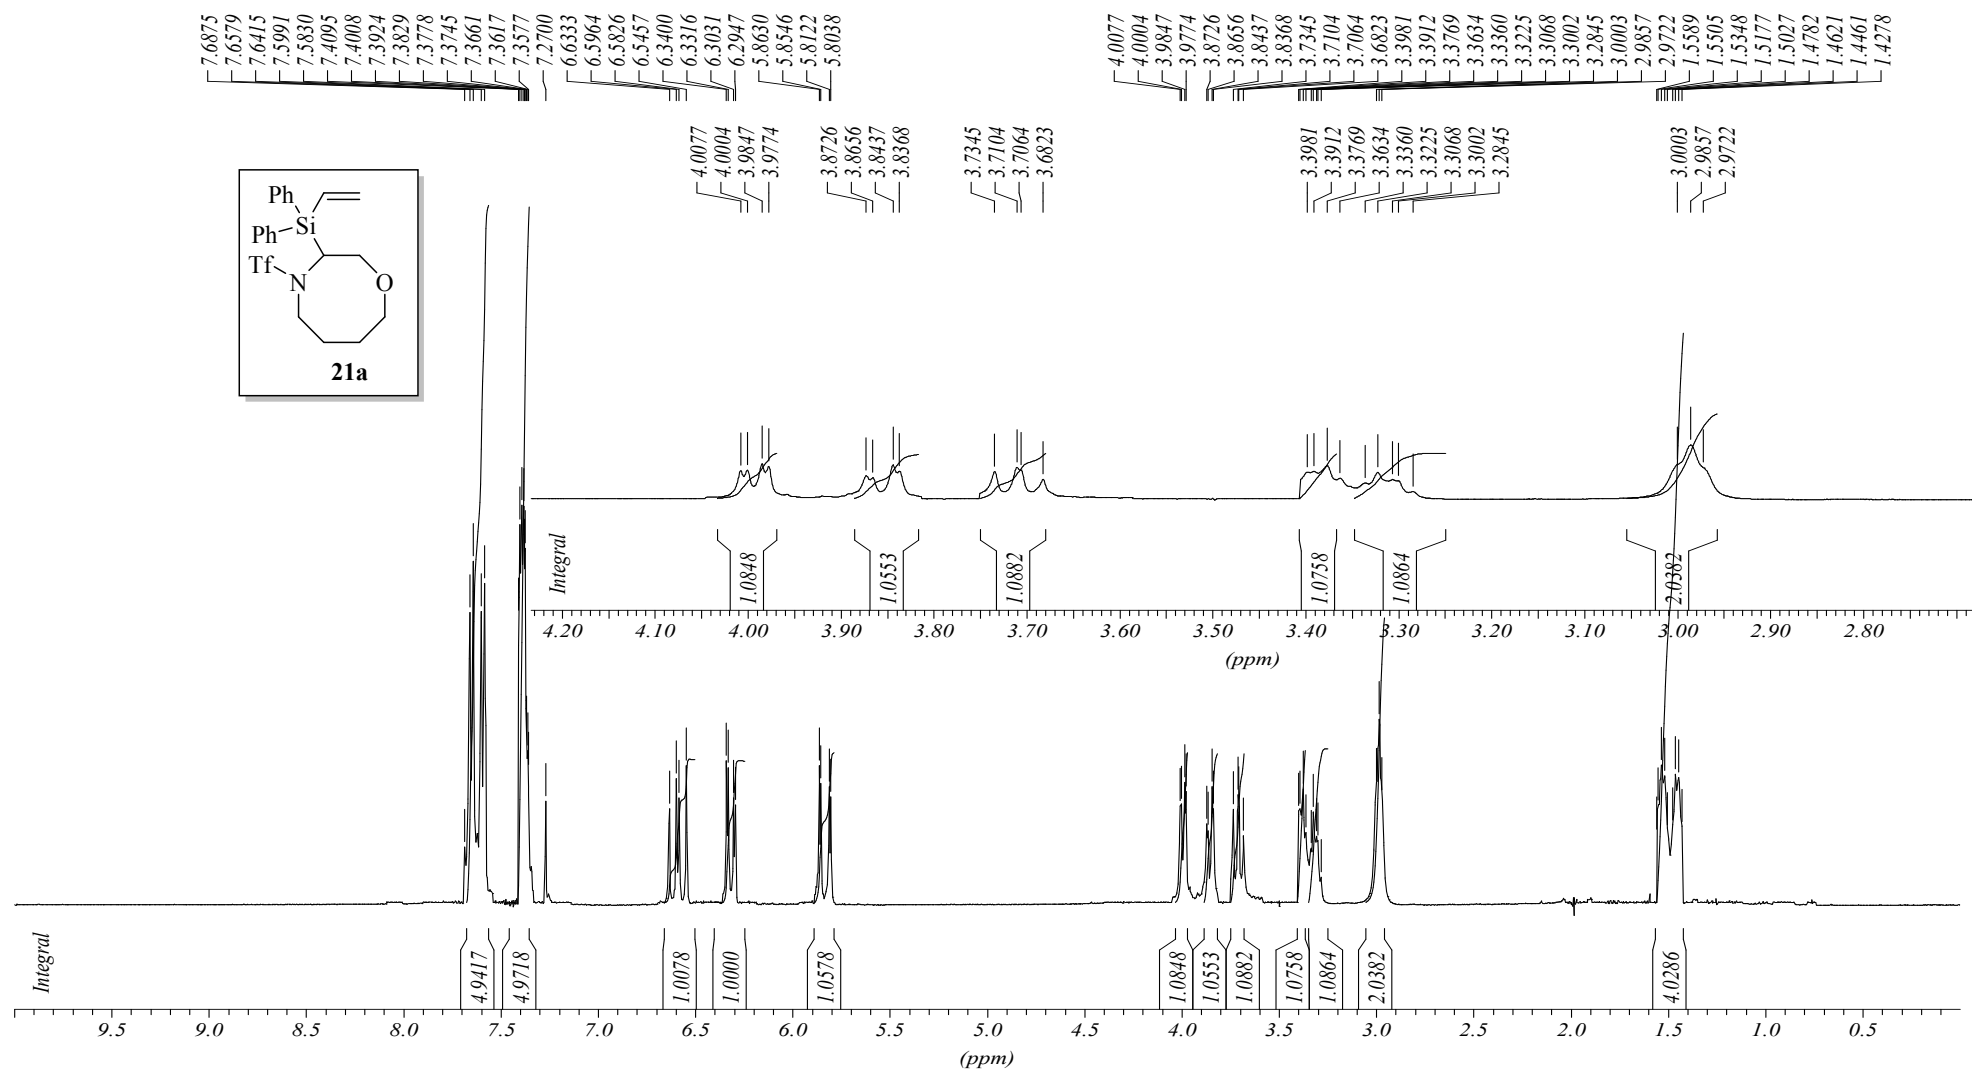

Figure S68.  $^{13}\text{C}$  NMR spectrum of compound **21a**.

*3-(Diphenyl(vinyl)silyl)-4-((trifluoromethyl)sulfonyl)-1,4-oxazocane, 21a* (R = Ph).

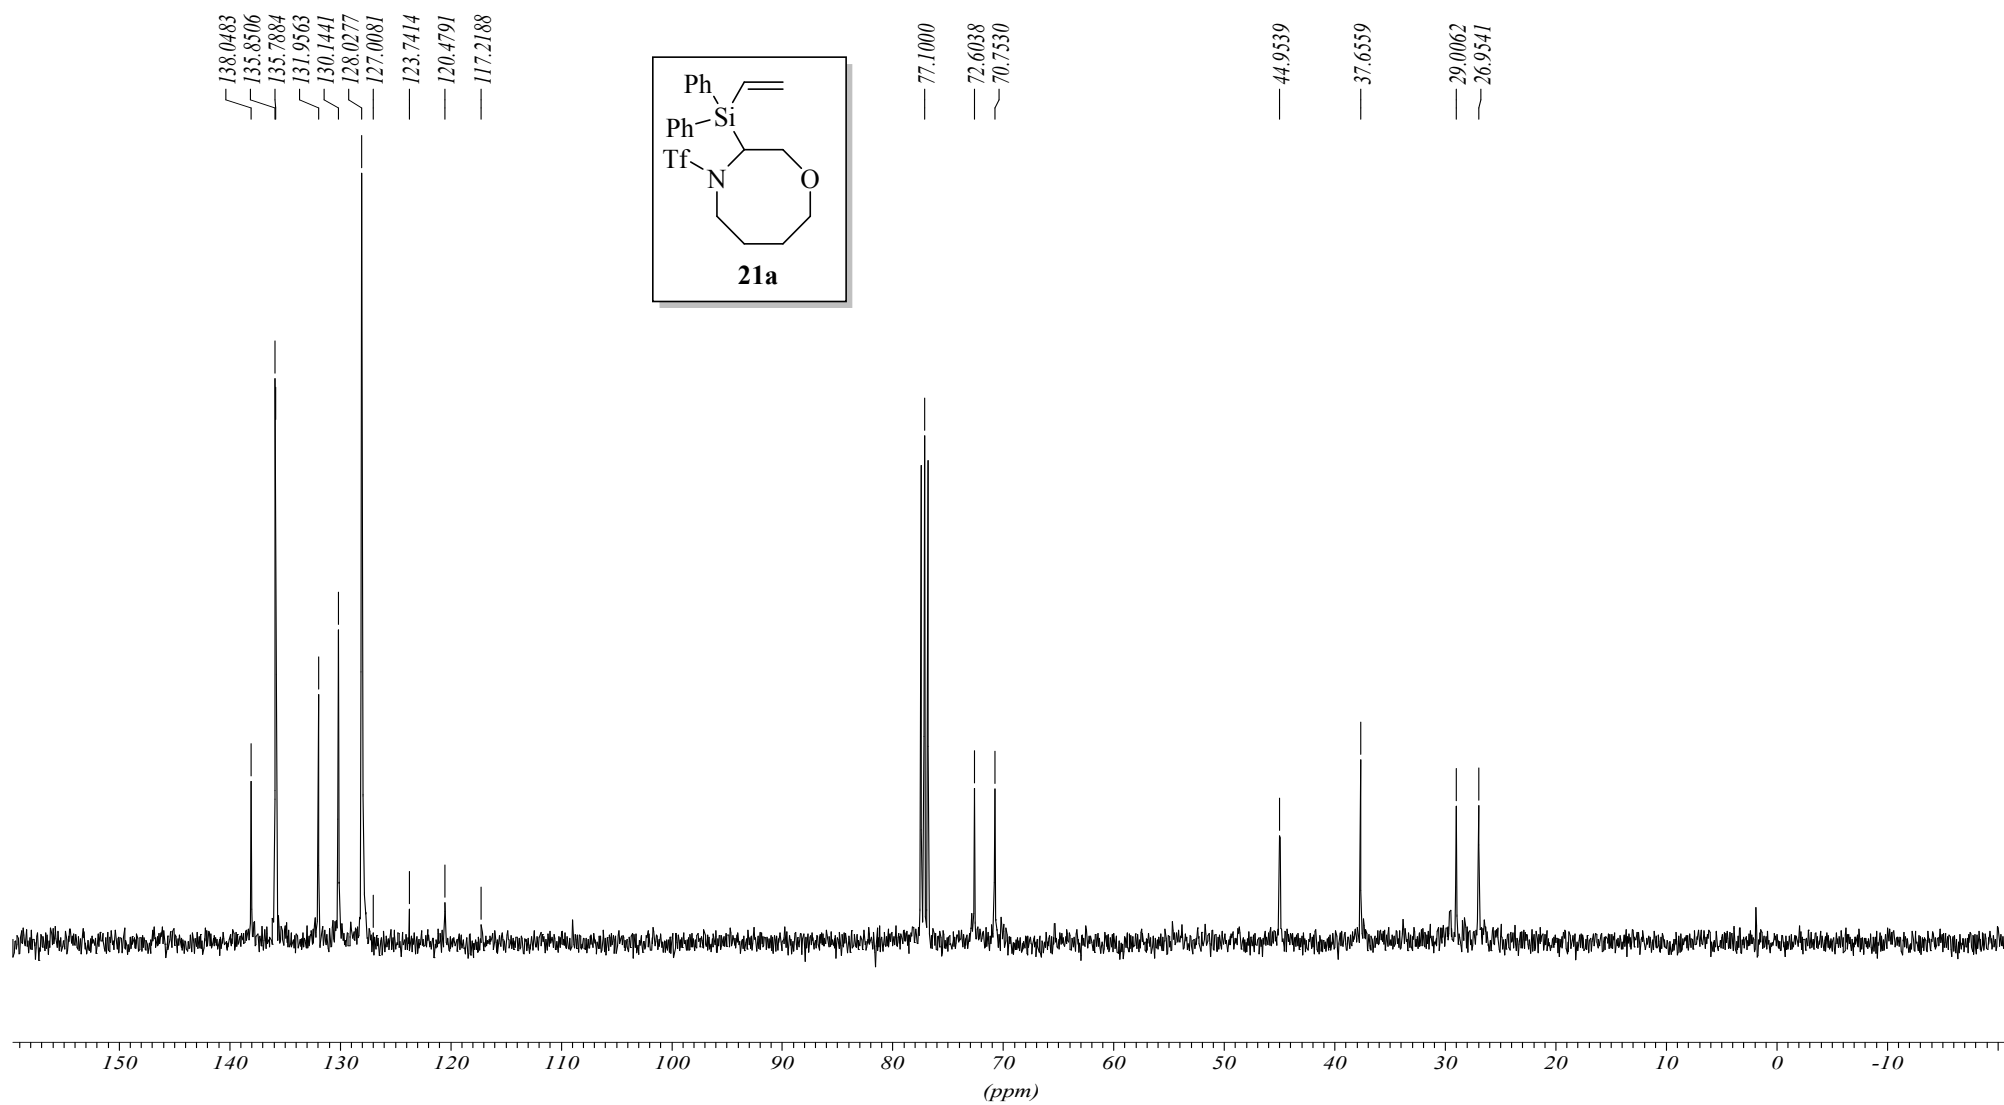

Figure S69. <sup>1</sup>H NMR spectrum of compound **21d**

3-(Diphenyl(vinyl)silyl)-4-((4-nitrophenyl)sulfonyl)-1,4-oxazocane, **21d** (R = Ph).

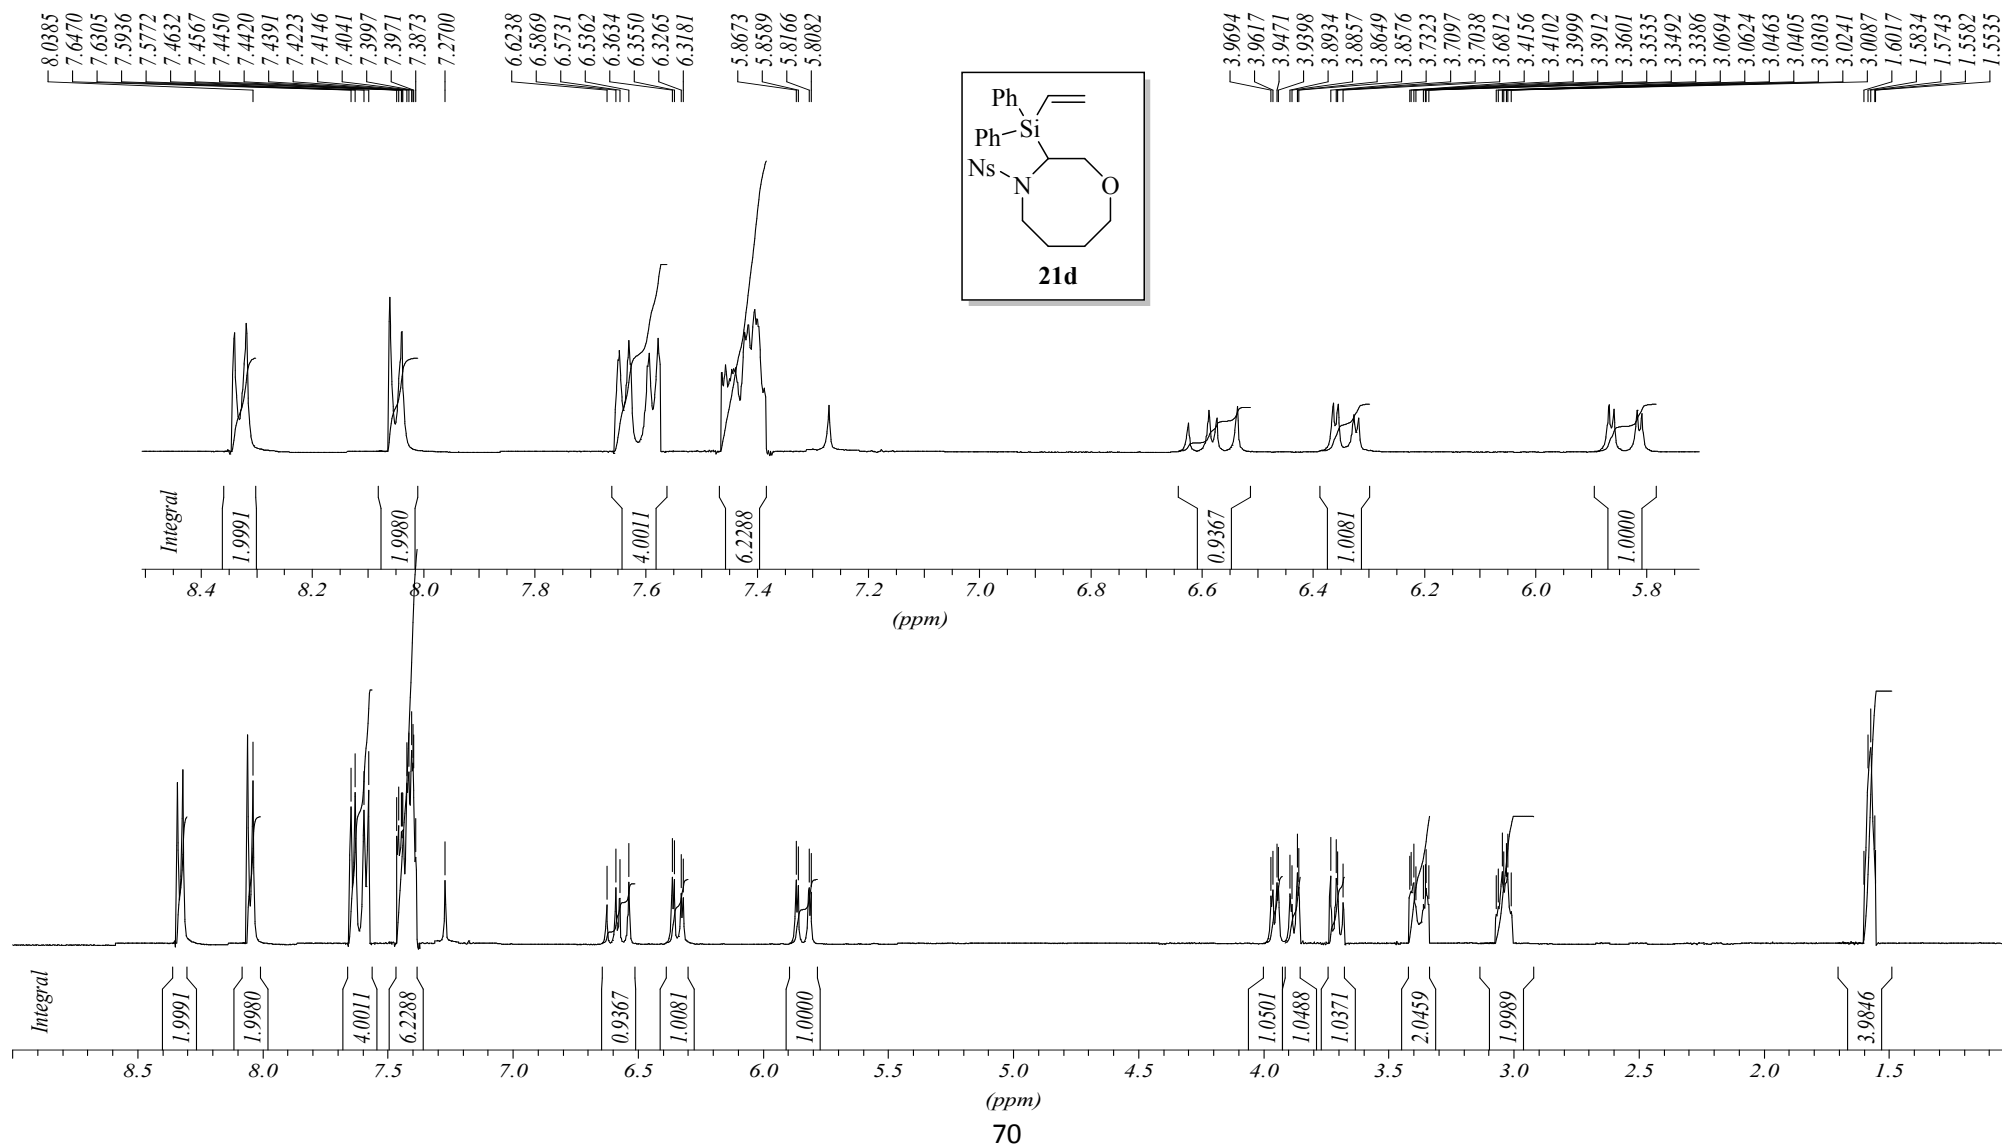

Figure S70.  $^{13}\text{C}$  NMR spectrum of compound **21d**

*3-(Diphenyl(vinyl)silyl)-4-((4-nitrophenyl)sulfonyl)-1,4-oxazocane, 21d* (R = Ph).

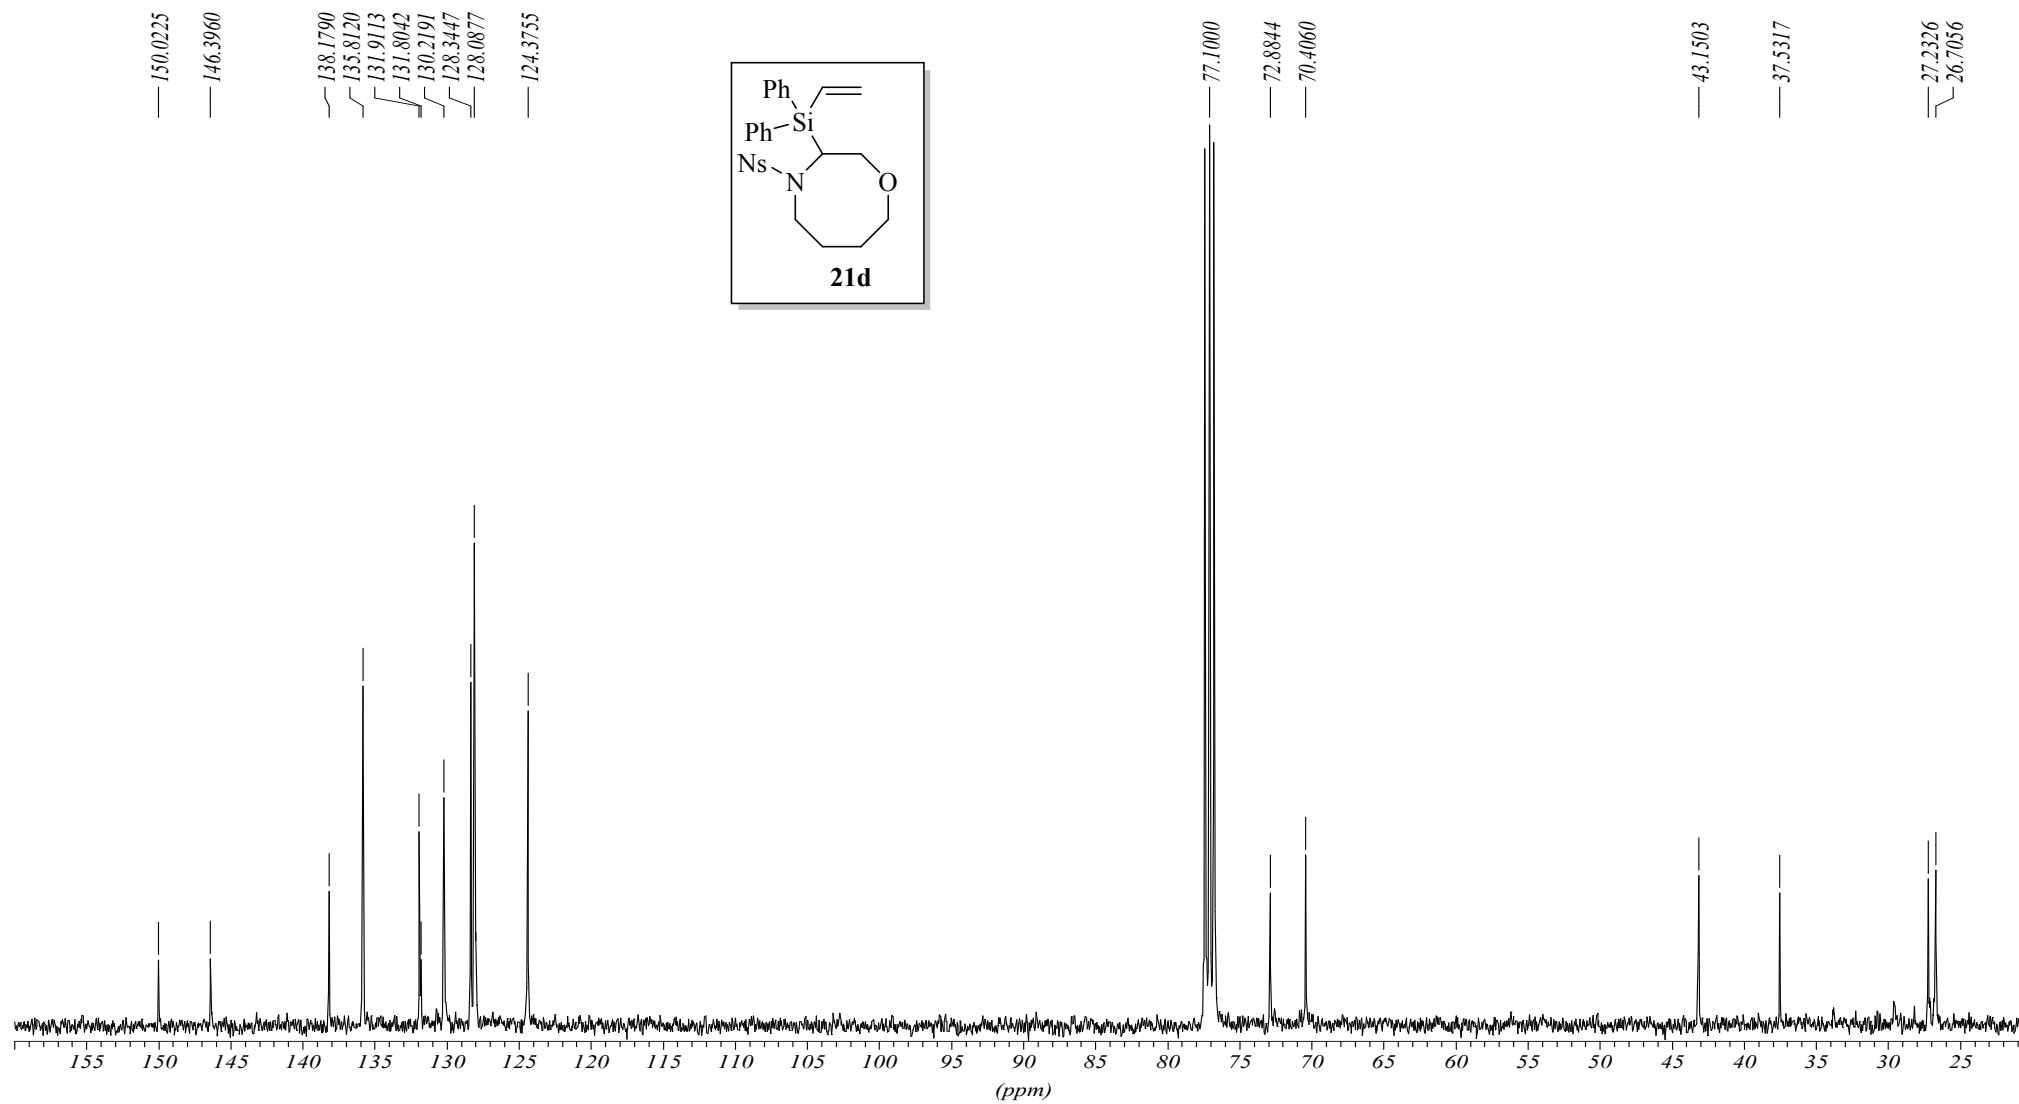

Figure S71. <sup>1</sup>H NMR spectrum of compound **21a**

3-(Dimethyl(vinyl)silyl)-4-((trifluoromethyl)sulfonyl)-1,4-oxazocane, **21a** (R = Me).

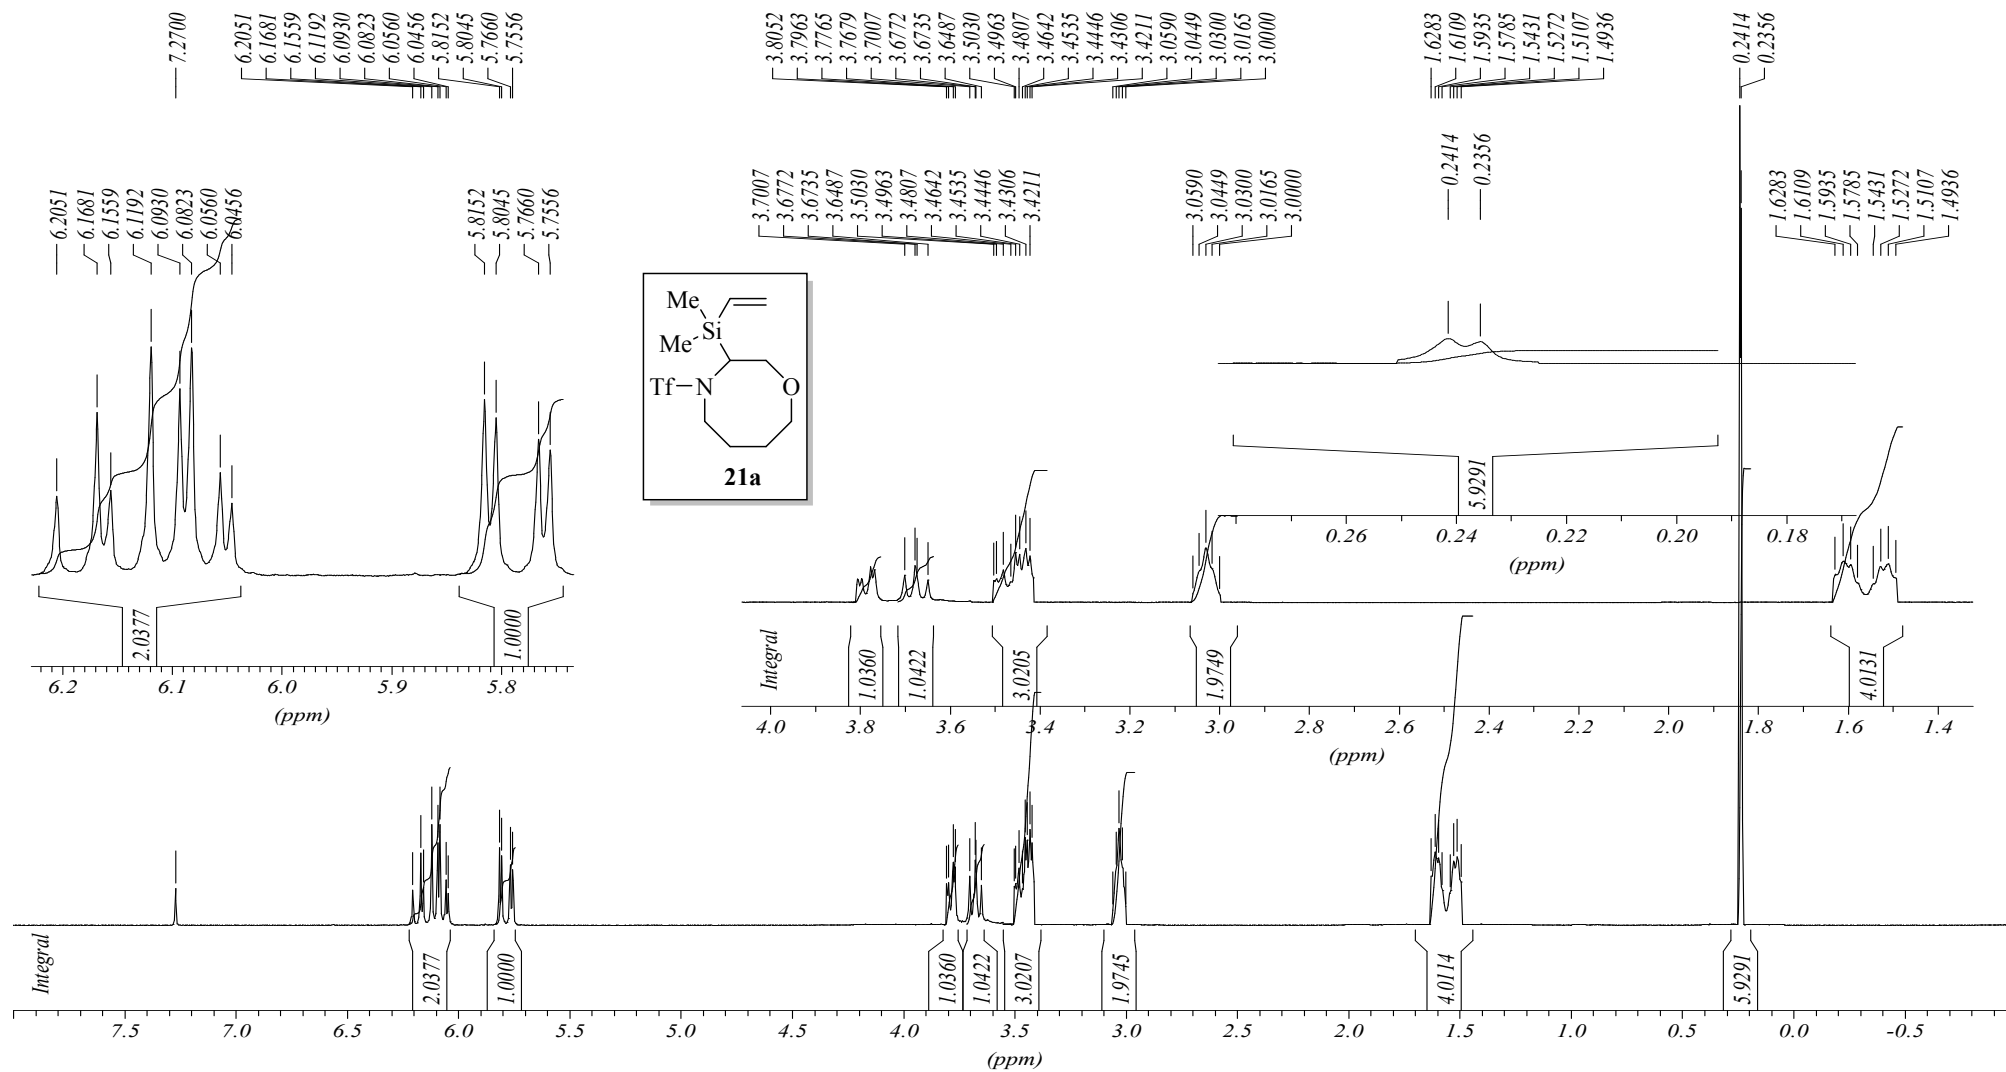



Figure S72.  $^{13}\text{C}$  NMR spectrum of compound **21a**

3-(Dimethyl(vinyl)silyl)-4-((trifluoromethyl)sulfonyl)-1,4-oxazocane, **21a** (R = Me).

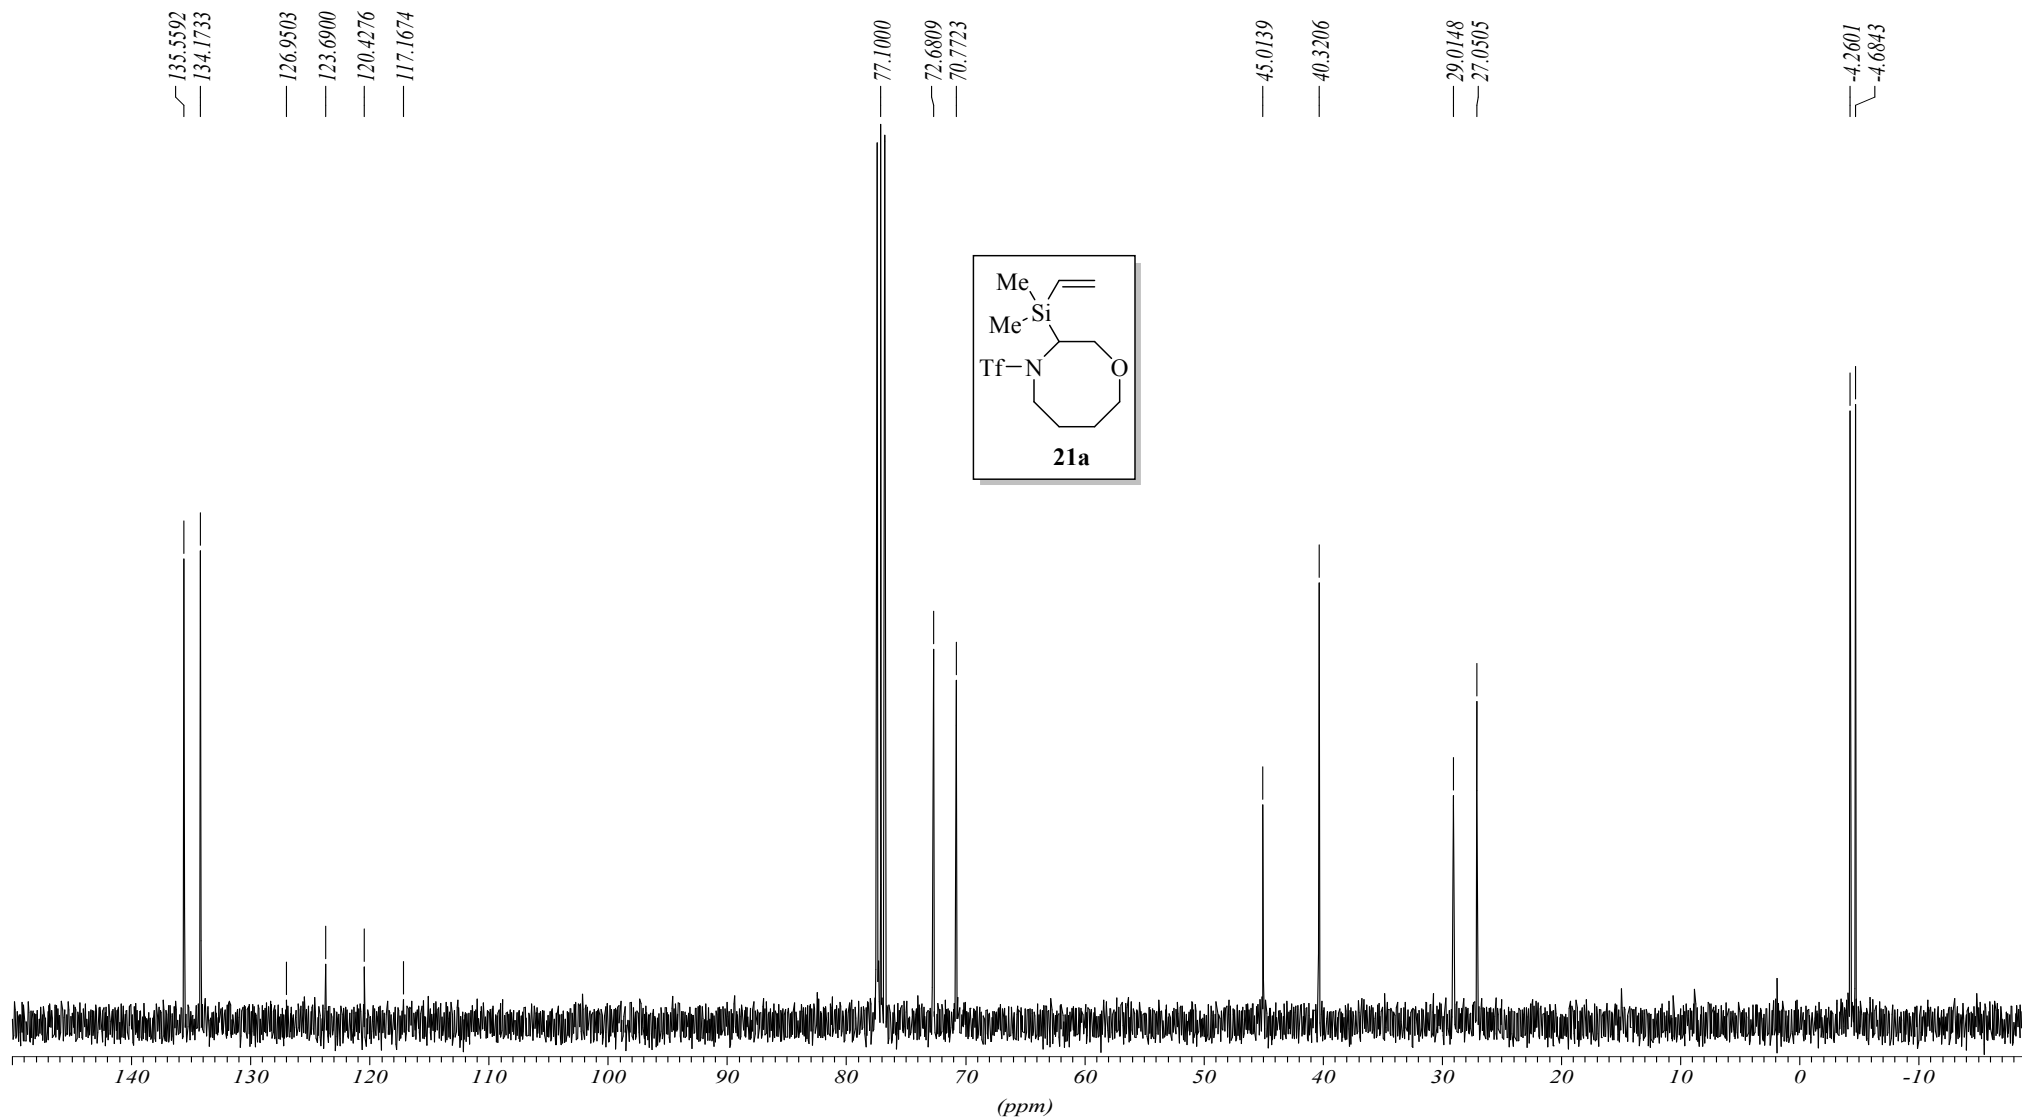

Figure S73.  $^1\text{H}$  NMR monitoring of the reaction mixture (**13d** +  $\text{K}_2\text{CO}_3$ ,  $\text{R}^1 = \text{Ph}$ ): 20, 40 and 60 min after the start of the reaction.

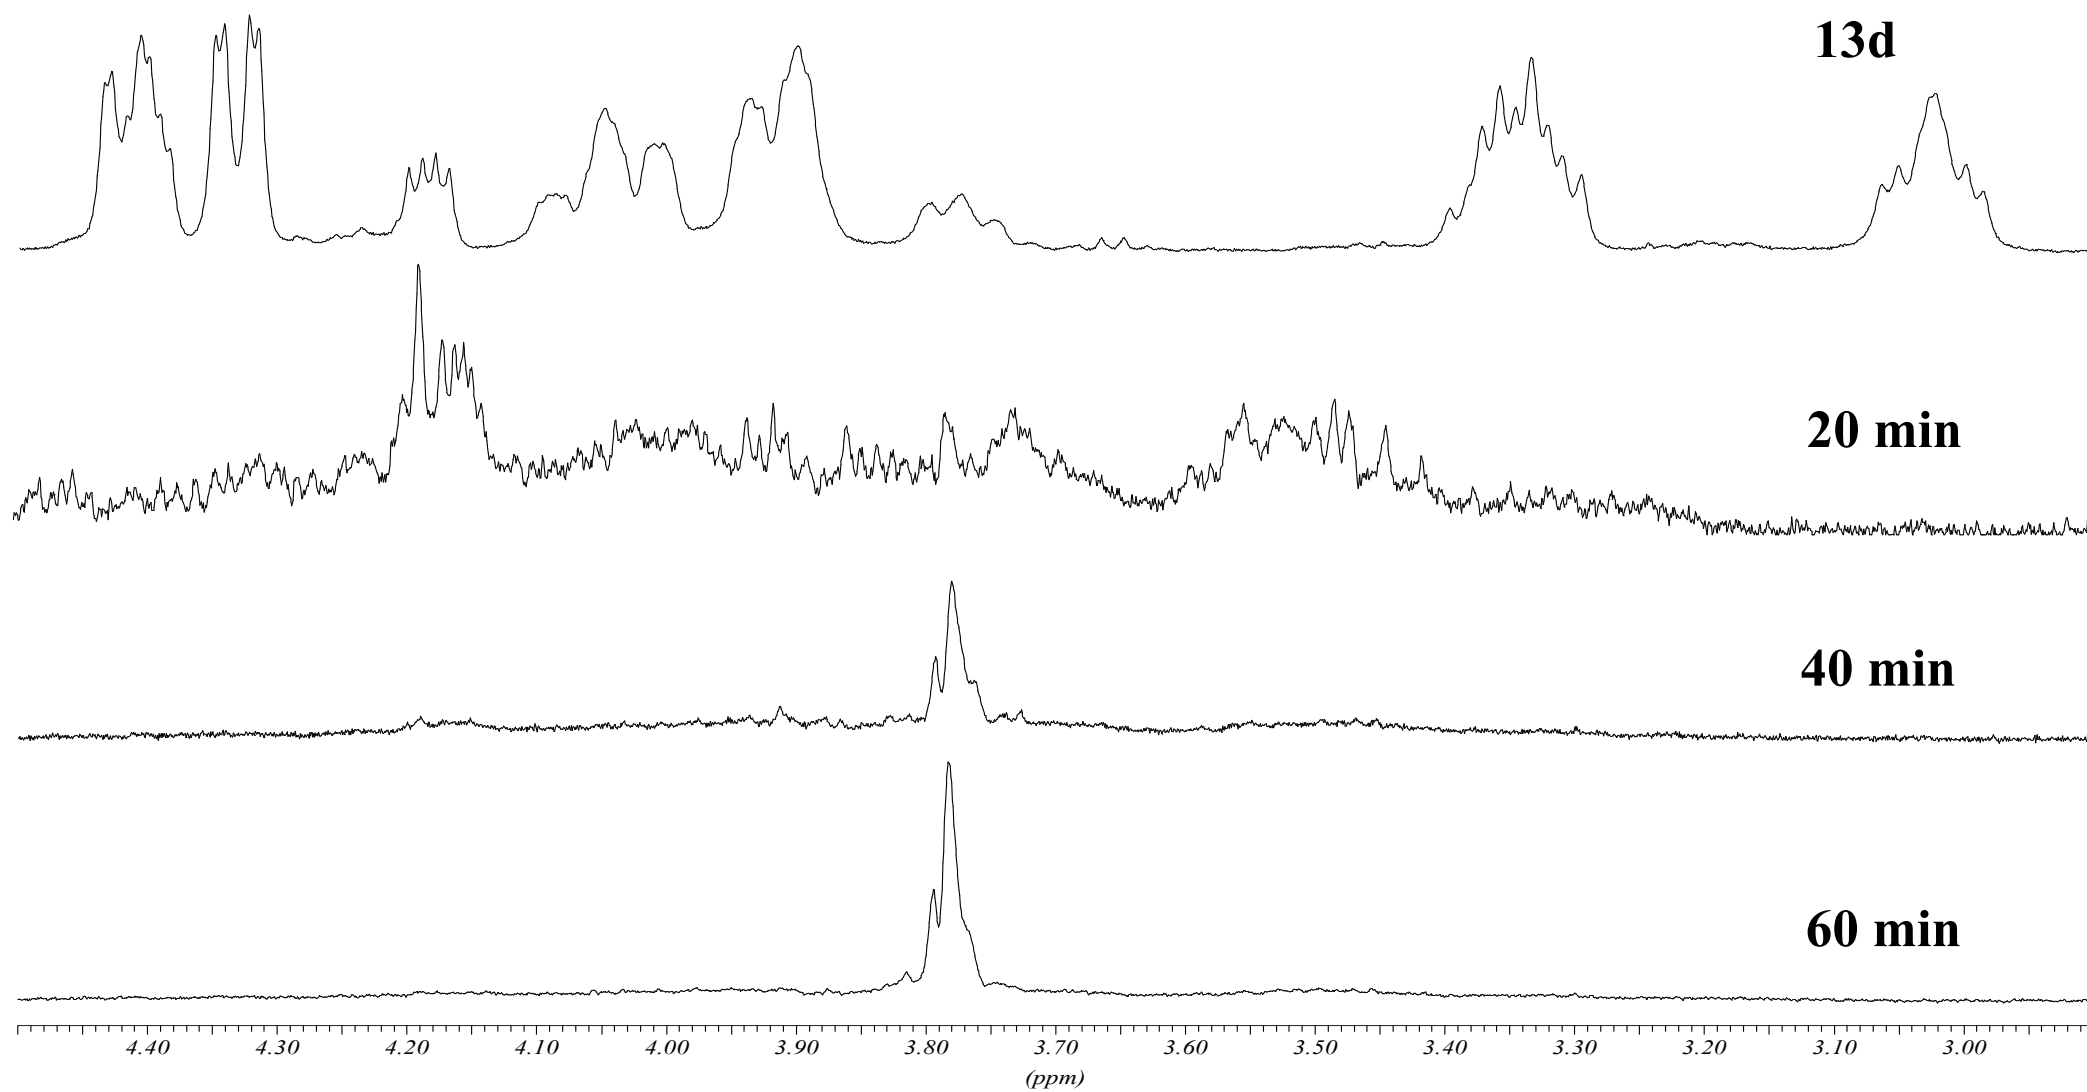

Supplement: d0ra07469a1.pdf [file d0ra07469a1.pdf]
